# Supplementary material for: Development of Fluorescently Labeled SSEA-3, SSEA-4, and Globo-H Glycosphingolipids for Elucidating Molecular Interactions in the Cell Membrane
Source: MDPI journal article supplement (doi:10.3390/ijms20246187), 2019-12-07
Supplement: s1 [file s1]

*Supporting Information*

**Development of fluorescently labeled SSEA-3, SSEA-4,  
and Globo-H glycosphingolipids for elucidating  
molecular interactions in the cell membrane**

Sachi Asano <sup>2,3</sup>, Rita Pal <sup>3</sup>, Hide-Nori Tanaka <sup>1,2,3</sup>, Akihiro Imamura <sup>2,3</sup>,  
Hideharu Ishida <sup>1,2,3</sup>, Kenichi G. N. Suzuki <sup>1,2,3,\*</sup>, and Hiromune Ando <sup>1,2,3,\*</sup>

<sup>1</sup> *Center for Highly Advanced Integration of Nano and Life Sciences (G-CHAIN), Gifu University, 1-1 Yanagido, Gifu 501-1193, Japan*

<sup>2</sup> *The United Graduate School of Agricultural Science, Gifu University, 1-1 Yanagido, Gifu 501-1193, Japan*

<sup>3</sup> *Department of Applied Bioorganic Chemistry, Gifu University, 1-1 Yanagido, Gifu 501-1193, Japan*

*\* Correspondence: kgsuzuki@gifu-u.ac.jp (K. G. N. S.); hando@gifu-u.ac.jp (H. A.)*

**Table of contents**

1. General information
2. Synthetic procedures
3. <sup>1</sup>H and <sup>13</sup>C NMR spectral data for new compounds
4. References

## 1. General information

All reactions were performed under an argon atmosphere. All chemicals were purchased from commercial suppliers and used without further purification, if not stated otherwise. Molecular sieves were purchased from FUJIFILM Wako Pure Chemical Co. (Osaka, Japan) and pre-dried at 300 °C for 2 h in a muffle furnace, and dried in a flask at 300 °C for 2 h in vacuo prior to use. Dry solvents for reaction media (CH<sub>2</sub>Cl<sub>2</sub>, toluene, THF, MeCN, DMF, and pyridine) were purchased from Kanto Chemical Co., Inc. (Tokyo, Japan) and used without purification. Other solvents for reaction media were dried over molecular sieves and used without purification. TLC analysis was performed on Merck TLC plates (silica gel 60F<sub>254</sub> on glass plates), and visualized either by exposure to UV light (253.6 nm) or by soaking in a solution of 10% H<sub>2</sub>SO<sub>4</sub> in ethanol followed by heating. Purification by flash column chromatography was performed on a silica gel (80 and 300 mesh; Fuji Silysia Chemical, Ltd., Aichi, Japan). The quantity of silica gel was usually estimated as 50- to 100-fold weight of crude sample to be charged. Solvent systems for chromatography were specified as v/v ratios. Evaporation, concentration, and drying-up were performed *in vacuo*. <sup>1</sup>H and <sup>13</sup>C NMR spectra were recorded on 500 and 800 MHz spectrometers (Biospin AVANCE III; Bruker, Billerica, MA, USA). Chemical shifts (δ) were measured in ppm relative to TMS δ = 0.00 ppm as an internal standard. Data are presented as follows: chemical shift, multiplicity (s = singlet, d = doublet, t = triplet, q = quartet, quin = quintet, sext = sextet, dd = double doublet, dt = double triplet, and m = multiplet and/or multiple resonances), integration, coupling constant in Hz, and position of the corresponding proton. <sup>1</sup>H-<sup>1</sup>H COSY, <sup>1</sup>H-<sup>13</sup>C HMBC and <sup>1</sup>H-<sup>13</sup>C HMQC methods were used to confirm the NMR signal assignments. High-resolution mass (ESI-TOF MS) spectra were taken with a Bruker micrOTOF. Optical rotations were measured with a high-sensitivity polarimeter (SEPA-300; Horiba, Kyoto, Japan). All analogs labeled with ATTO594-NHS ester (ATTO-TEC; AD 594-35) were stored at -80 °C in glass vials after freeze-drying.

## 2. Synthetic procedures

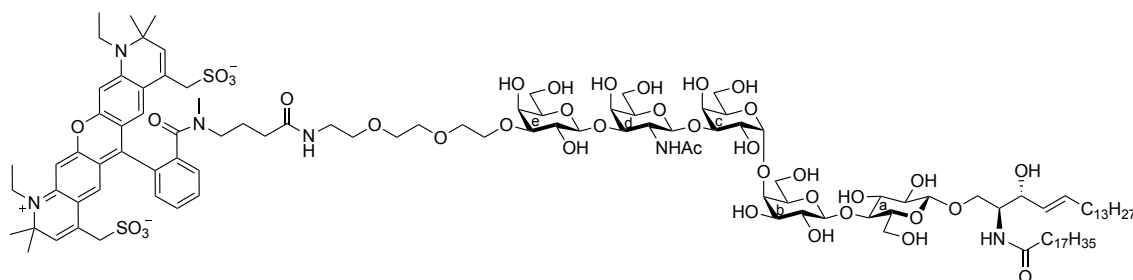

### ATTO594 SSEA-3 (1)

To a solution of compound **20** (3.4 mg, 2.50  $\mu$ mol) in DMF/H<sub>2</sub>O = 11/1 (0.22 mL) were added ATTO594 NHS ester (4.6 mg, 3.29  $\mu$ mol) and Et<sub>3</sub>N (6.10  $\mu$ L, 43.9  $\mu$ mol). After stirring for 4 h at ambient temperature as the progress of the reaction was monitored by TLC (CHCl<sub>3</sub>/MeOH/H<sub>2</sub>O/AcOH = 5/4/1/0.2), the reaction mixture was purified by gel filtration (LH20; CHCl<sub>3</sub>/MeOH = 1/1) and PTLC (CHCl<sub>3</sub>/MeOH/H<sub>2</sub>O = 5/4/1) to give compound **1** (5.1 mg, 100%) as a blue syrup; <sup>1</sup>H NMR (500 MHz, CD<sub>3</sub>OD)  $\delta$  7.75–5.89 (m, 9 H, Ar<sup>ATTO594</sup>), 5.68 (near quin, 1 H,  $J_{5,6a} = J_{5,6b} = 6.5$  Hz,  $J_{4,5} = 15.3$  Hz, H-5<sup>Cer</sup>), 5.44 (dd, 1 H,  $J_{3,4} = 7.5$  Hz, H-4<sup>Cer</sup>), 4.94 (d, 1 H,  $J_{1,2} = 4.0$  Hz, H-1<sup>c</sup>), 4.73–3.20 (m, 56 H, H-1<sup>a</sup>, H-2<sup>a</sup>, H-3<sup>a</sup>, H-4<sup>a</sup>, H-5<sup>a</sup>, H-6a<sup>a</sup>, H-6b<sup>a</sup>, H-1<sup>b</sup>, H-2<sup>b</sup>, H-3<sup>b</sup>, H-4<sup>b</sup>, H-5<sup>b</sup>, H-6a<sup>b</sup>, H-6b<sup>b</sup>, H-2<sup>c</sup>, H-3<sup>c</sup>, H-4<sup>c</sup>, H-5<sup>c</sup>, H-6a<sup>c</sup>, H-6b<sup>c</sup>, H-1<sup>d</sup>, H-2<sup>d</sup>, H-3<sup>d</sup>, H-4<sup>d</sup>, H-5<sup>d</sup>, H-6a<sup>d</sup>, H-6b<sup>d</sup>, H-1<sup>e</sup>, H-2<sup>e</sup>, H-3<sup>e</sup>, H-4<sup>e</sup>, H-5<sup>e</sup>, H-6a<sup>e</sup>, H-6b<sup>e</sup>, H-1a<sup>Cer</sup>, H-1b<sup>Cer</sup>, H-2<sup>Cer</sup>, H-3<sup>Cer</sup>, 5 OCH<sub>2</sub>, NHCH<sub>2</sub>, 3 NCH<sub>2</sub><sup>ATTO594</sup>, 2 CH<sub>2</sub>SO<sub>3</sub><sup>ATTO594</sup>), 2.72 and 2.64 (2 s, 3 H, NCH<sub>3</sub><sup>ATTO594</sup>), 2.18–2.15 (m, 2 H, NHC(=O)CH<sub>2</sub><sup>Cer</sup>), 2.03–2.00 (m, 2 H, H-6a<sup>Cer</sup>, H-6b<sup>Cer</sup>), 1.97 (m, 3 H, Ac), 1.78–1.29 (m, 74 H, 26 CH<sub>2</sub><sup>Cer</sup>, NCH<sub>2</sub>CH<sub>2</sub><sup>ATTO594</sup>, NCH<sub>2</sub>CH<sub>2</sub>CH<sub>2</sub><sup>ATTO594</sup>, 2 NCH<sub>2</sub>CH<sub>3</sub><sup>ATTO594</sup>, 4 Me<sup>ATTO594</sup>), 0.91–0.88 (m, 6 H, 2 Me<sup>Cer</sup>); <sup>13</sup>C NMR (200 MHz, CD<sub>3</sub>OD)  $\delta$  180.3, 176.0, 175.2, 175.1, 175.0, 173.0, 171.5, 171.3, 159.2, 155.1, 154.2, 138.4, 137.6, 137.4, 135.1, 132.2, 131.9, 131.8, 131.4, 131.2, 130.7, 130.5, 129.3, 129.0, 126.1, 124.3, 124.3, 124.2, 122.9, 115.0, 106.3, 105.6, 104.4, 104.3, 102.8, 97.0, 96.9, 83.3, 83.2, 81.3, 81.2, 80.8, 80.0, 80.0, 79.5, 79.0, 76.5, 76.4, 76.4, 76.3, 75.0, 74.7, 73.0, 72.6, 72.5, 71.7, 71.6, 71.5, 71.5, 71.1, 70.6, 70.5, 70.0, 69.7, 69.7, 69.5, 69.5, 66.8, 64.3, 62.7, 61.8, 61.7, 61.6, 61.5, 58.4, 54.7, 54.1, 54.1, 53.9, 53.9, 53.4, 53.0, 50.4, 47.5, 46.8, 41.4, 40.4, 40.3, 38.8, 37.4, 33.7, 33.5, 33.4, 33.2, 33.1, 32.9, 32.8, 32.7, 30.9, 30.9, 30.9, 30.9, 30.8, 30.8, 30.7, 30.6, 30.5, 30.5, 29.5, 29.4, 29.3, 27.2, 25.1, 24.2, 23.8, 23.7, 23.7, 23.5, 23.0, 20.9, 18.4, 14.5, 14.5, 14.4, 13.8, 13.7; HRMS (ESI)  $m/z$ : found [(M-H)/2]<sup>-</sup> 1166.5867, C<sub>115</sub>H<sub>181</sub>N<sub>6</sub>O<sub>39</sub>S<sub>2</sub><sup>-</sup> calcd for [(M-H)/2]<sup>-</sup> 1166.5869.

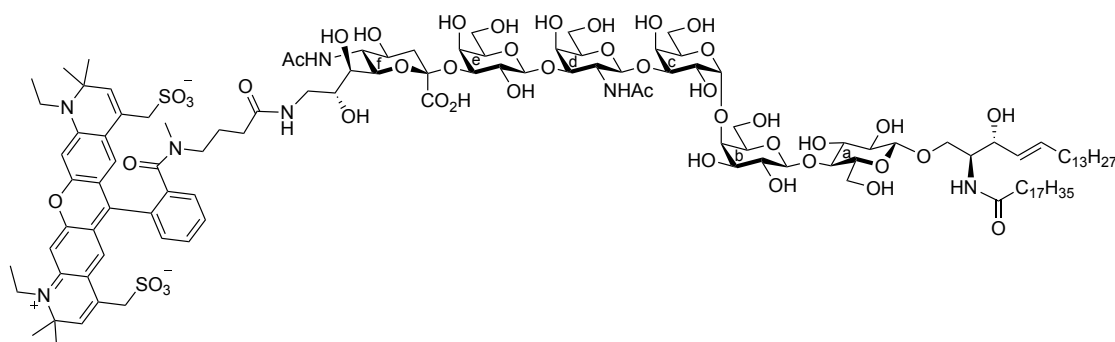

## ATTO594 SSEA-4 (2)

To a solution of compound **38** (3.5 mg, 2.05  $\mu\text{mol}$ ) in DMF/H<sub>2</sub>O = 11/1 (0.21 mL) were added ATTO594 NHS ester (4.3 mg, 3.07  $\mu\text{mol}$ ) and Et<sub>3</sub>N (5.70  $\mu\text{L}$ , 41.0  $\mu\text{mol}$ ). After stirring for 22 h at ambient temperature as the progress of the reaction was monitored by TLC (CHCl<sub>3</sub>/MeOH/5% aq. CaCl<sub>2</sub> = 5/4/1), the reaction mixture was purified by gel filtration (LH20; CHCl<sub>3</sub>/MeOH = 1/1) and PTLC (1<sup>st</sup>: CHCl<sub>3</sub>/MeOH/H<sub>2</sub>O = 5/4/1, 2<sup>nd</sup>: CHCl<sub>3</sub>/MeOH/H<sub>2</sub>O = 5/4/1, 3<sup>rd</sup>: CHCl<sub>3</sub>/MeOH/H<sub>2</sub>O = 5/5/0.5) to give compound **2** (4.2 mg, 82%) as a blue syrup; <sup>1</sup>H NMR (500 MHz, CD<sub>3</sub>OD)  $\delta$  7.75–5.88 (m, 9 H, Ar<sup>ATTO594</sup>), 5.68 (near quin, 1 H,  $J_{5,6a} = J_{5,6b} = 6.5$  Hz,  $J_{4,5} = 15.4$  Hz, H-5<sup>Cer</sup>), 5.44 (dd, 1 H,  $J_{3,4} = 7.8$  Hz, H-4<sup>Cer</sup>), 4.94–3.16 (m, 58 H, H-1<sup>a</sup>, H-2<sup>a</sup>, H-3<sup>a</sup>, H-4<sup>a</sup>, H-5<sup>a</sup>, H-6a<sup>a</sup>, H-6b<sup>a</sup>, H-1<sup>b</sup>, H-2<sup>b</sup>, H-3<sup>b</sup>, H-4<sup>b</sup>, H-5<sup>b</sup>, H-6a<sup>b</sup>, H-6b<sup>b</sup>, H-1<sup>c</sup>, H-2<sup>c</sup>, H-3<sup>c</sup>, H-4<sup>c</sup>, H-5<sup>c</sup>, H-6a<sup>c</sup>, H-6b<sup>c</sup>, H-1<sup>d</sup>, H-2<sup>d</sup>, H-3<sup>d</sup>, H-4<sup>d</sup>, H-5<sup>d</sup>, H-6a<sup>d</sup>, H-6b<sup>d</sup>, H-1<sup>e</sup>, H-2<sup>e</sup>, H-3<sup>e</sup>, H-4<sup>e</sup>, H-5<sup>e</sup>, H-6a<sup>e</sup>, H-6b<sup>e</sup>, H-4<sup>f</sup>, H-5<sup>f</sup>, H-6<sup>f</sup>, H-7<sup>f</sup>, H-8<sup>f</sup>, H-9a<sup>f</sup>, H-9b<sup>f</sup>, H-1a<sup>Cer</sup>, H-1b<sup>Cer</sup>, H-2<sup>Cer</sup>, H-3<sup>Cer</sup>, NHCH<sub>2</sub>, 3 NCH<sub>2</sub><sup>ATTO594</sup>, 2 CH<sub>2</sub>SO<sub>3</sub><sup>ATTO594</sup>), 2.85 (m, 1 H, H-3eq<sup>f</sup>), 2.71 and 2.66 (2 s, 3 H, NCH<sub>3</sub><sup>ATTO594</sup>), 2.18–2.15 (m, 2 H, NHC(=O)CH<sub>2</sub><sup>Cer</sup>), 2.04–1.96 (m, 8 H, H-6a<sup>Cer</sup>, H-6b<sup>Cer</sup>, 2 Ac), 1.83–1.29 (m, 75 H, H-3ax<sup>f</sup>, 26 CH<sub>2</sub><sup>Cer</sup>, NCH<sub>2</sub>CH<sub>2</sub><sup>ATTO594</sup>, NCH<sub>2</sub>CH<sub>2</sub>CH<sub>2</sub><sup>ATTO594</sup>, 2 NCH<sub>2</sub>CH<sub>3</sub><sup>ATTO594</sup>, 4 Me<sup>ATTO594</sup>), 0.91–0.88 (m, 6 H, 2 Me<sup>Cer</sup>); <sup>13</sup>C NMR (200 MHz, CD<sub>3</sub>OD)  $\delta$  176.0, 175.9, 175.3, 175.3, 175.0, 175.0, 175.0, 171.2, 159.2, 159.1, 154.9, 154.2, 138.4, 137.7, 135.1, 132.2, 131.8, 131.4, 131.2, 130.7, 128.9, 126.2, 126.1, 124.2, 124.2, 122.9, 122.9, 115.0, 106.1, 106.1, 105.5, 104.4, 104.4, 102.8, 101.3, 97.2, 97.1, 81.3, 81.2, 81.1, 80.5, 80.0, 77.6, 76.8, 76.5, 76.4, 76.4, 76.2, 75.0, 74.8, 74.7, 73.0, 72.6, 72.5, 71.7, 70.8, 70.8, 70.7, 70.6, 69.9, 69.5, 69.5, 69.4, 69.4, 69.1, 63.0, 62.9, 62.8, 62.7, 61.8, 61.6, 54.7, 54.1, 54.0, 53.9, 53.9, 53.8, 53.2, 47.7, 43.7, 42.0, 41.4, 38.8, 37.4, 33.8, 33.6, 33.2, 33.1, 32.7, 31.0, 30.9, 30.9, 30.9, 30.8, 30.8, 30.7, 30.6, 30.6, 30.5, 29.5, 29.5, 29.4, 27.3, 23.8, 23.8, 23.6, 23.6, 22.8, 22.7, 14.5, 14.5, 13.9, 13.8; HRMS (ESI)  $m/z$ : found [(M-H)/2]<sup>-</sup> 1246.0952, C<sub>120</sub>H<sub>186</sub>N<sub>7</sub>O<sub>44</sub>S<sub>2</sub><sup>-</sup> calcd for [(M-H)/2]<sup>-</sup> 1246.0953.



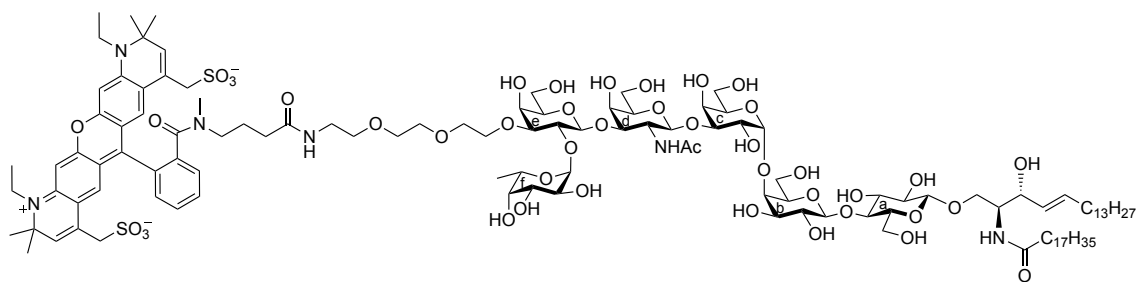

### ATTO594 Globo-H (3)

To a solution of compound **50** (2.3 mg, 1.36  $\mu$ mol) in DMF/H<sub>2</sub>O = 11/1 (0.19 mL) were added ATTO594 NHS ester (3.9 mg, 2.83  $\mu$ mol) and Et<sub>3</sub>N (5.20  $\mu$ L, 37.8  $\mu$ mol). After stirring for 1.5 h at ambient temperature as the progress of the reaction was monitored by TLC (CHCl<sub>3</sub>/MeOH/H<sub>2</sub>O/AcOH = 5/4/1/0.2), the reaction mixture was purified by gel filtration (LH20; CHCl<sub>3</sub>/MeOH = 1/1) and PTLC (CHCl<sub>3</sub>/MeOH/H<sub>2</sub>O = 5/4/1) to give compound **3** (2.3 mg, 68%) as a blue syrup; <sup>1</sup>H NMR (500 MHz, CD<sub>3</sub>OD)  $\delta$  7.74–5.86 (m, 9 H, Ar<sup>ATTO594</sup>), 5.68 (near quin, 1 H,  $J_{5,6a} = J_{5,6b} = 7.0$  Hz,  $J_{4,5} = 15.2$  Hz, H-5<sup>Cer</sup>), 5.44 (dd, 1 H,  $J_{3,4} = 7.8$  Hz, H-4<sup>Cer</sup>), 5.31–3.14 (m, 66 H, H-1<sup>a</sup>, H-2<sup>a</sup>, H-3<sup>a</sup>, H-4<sup>a</sup>, H-5<sup>a</sup>, H-6<sup>a</sup>, H-6b<sup>a</sup>, H-1<sup>b</sup>, H-2<sup>b</sup>, H-3<sup>b</sup>, H-4<sup>b</sup>, H-5<sup>b</sup>, H-6<sup>a</sup>, H-6b<sup>b</sup>, H-1<sup>c</sup>, H-2<sup>c</sup>, H-3<sup>c</sup>, H-4<sup>c</sup>, H-5<sup>c</sup>, H-6<sup>a</sup>, H-6b<sup>c</sup>, H-1<sup>d</sup>, H-2<sup>d</sup>, H-3<sup>d</sup>, H-4<sup>d</sup>, H-5<sup>d</sup>, H-6<sup>a</sup>, H-6b<sup>d</sup>, H-1<sup>e</sup>, H-2<sup>e</sup>, H-3<sup>e</sup>, H-4<sup>e</sup>, H-5<sup>e</sup>, H-6<sup>a</sup>, H-6b<sup>e</sup>, H-1<sup>f</sup>, H-2<sup>f</sup>, H-3<sup>f</sup>, H-4<sup>f</sup>, H-5<sup>f</sup>, H-1a<sup>Cer</sup>, H-1b<sup>Cer</sup>, H-2<sup>Cer</sup>, H-3<sup>Cer</sup>, 5 OCH<sub>2</sub>, NHCH<sub>2</sub>, 3 NCH<sub>2</sub><sup>ATTO594</sup>, 2 CH<sub>2</sub>SO<sub>3</sub><sup>ATTO594</sup>), 2.72 and 2.64 (2 s, 3 H, NCH<sub>3</sub><sup>ATTO594</sup>), 2.18–2.13 (m, 2 H, NHC(=O)CH<sub>2</sub><sup>Cer</sup>), 2.03–1.16 (m, 82 H, H-6<sup>f</sup>, H-6a<sup>Cer</sup>, H-6b<sup>Cer</sup>, Ac, 26 CH<sub>2</sub><sup>Cer</sup>, NCH<sub>2</sub>CH<sub>2</sub><sup>ATTO594</sup>, NCH<sub>2</sub>CH<sub>2</sub>CH<sub>2</sub><sup>ATTO594</sup>, 2 NCH<sub>2</sub>CH<sub>3</sub><sup>ATTO594</sup>, 4 Me<sup>ATTO594</sup>), 0.91–0.88 (m, 6 H, 2 Me<sup>Cer</sup>); <sup>13</sup>C NMR (200 MHz, CD<sub>3</sub>OD)  $\delta$  176.0, 175.1, 174.4, 171.2, 159.3, 154.2, 154.2, 138.4, 138.4, 137.6, 135.1, 131.4, 131.2, 130.8, 128.9, 126.1, 124.3, 124.2, 123.0, 123.0, 115.1, 115.1, 105.6, 105.5, 104.5, 104.1, 102.9, 100.7, 97.1, 97.0, 84.6, 81.3, 80.6, 80.2, 79.1, 76.6, 76.5, 76.3, 75.2, 75.0, 74.8, 73.9, 73.6, 73.1, 72.7, 72.6, 71.7, 71.4, 71.1, 70.7, 70.5, 70.2, 70.0, 69.9, 69.7, 69.7, 67.8, 66.7, 64.5, 62.7, 62.7, 61.9, 61.8, 61.7, 61.7, 61.6, 54.8, 53.9, 53.2, 48.3, 47.7, 41.4, 40.5, 39.3, 38.8, 37.4, 33.9, 33.5, 33.1, 33.1, 33.1, 30.9, 30.9, 30.9, 30.9, 30.8, 30.8, 30.8, 30.7, 30.7, 30.7, 30.5, 30.5, 30.5, 30.5, 29.5, 29.5, 29.3, 29.3, 27.9, 27.2, 24.2, 23.8, 23.6, 21.6, 16.7, 14.5, 14.4, 13.8, 13.8; HRMS (ESI)  $m/z$ : found [(M–H)/2]<sup>–</sup> 1239.6158, C<sub>121</sub>H<sub>191</sub>N<sub>6</sub>O<sub>43</sub>S<sub>2</sub><sup>–</sup> calcd for [(M–H)/2]<sup>–</sup> 1239.6159.

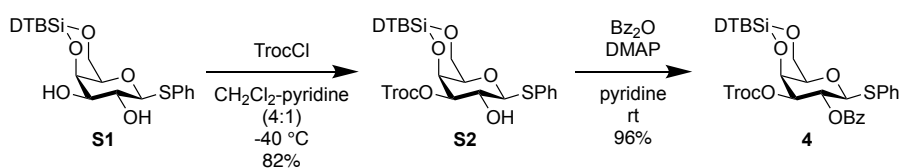

Supporting Scheme 1. Synthesis of Gal donor **4**.

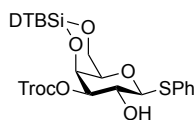

## Compound S2

To a solution of compound **S1**<sup>501</sup> (1.45 g, 3.51 mmol) in CH<sub>2</sub>Cl<sub>2</sub>/pyridine = 4/1 (35 mL) was added TrocCl (566  $\mu$ L, 4.22 mmol) at  $-40^{\circ}\text{C}$ . After stirring for 30 min at  $-40^{\circ}\text{C}$  as the progress of the reaction was monitored by TLC (*n*-hexane/EtOAc = 2/1), the reaction mixture was co-evaporated with toluene and diluted with CHCl<sub>3</sub>. The organic layer was washed with 2 M HCl, H<sub>2</sub>O, satd. aq. NaHCO<sub>3</sub> and brine, dried over Na<sub>2</sub>SO<sub>4</sub>, and concentrated. The residue was purified by silica gel column chromatography (*n*-hexane/EtOAc = 12/1  $\rightarrow$  5/1) to give compound **S2** (1.68 g, 82%) as a white foam;  $[\alpha]_{\text{D}} -1.8^{\circ}$  (c 1.0, CHCl<sub>3</sub>); <sup>1</sup>H NMR (500 MHz, CDCl<sub>3</sub>)  $\delta$  7.57–7.29 (m, 5 H, Ph), 4.93 (d, 1 H,  $J_{\text{gem}} = 11.8$  Hz, C(=O)OCH<sub>2</sub>CCl<sub>3</sub>), 4.79 (d, 1 H,  $J_{3,4} = 3.0$  Hz, H-4), 4.71 (d, 1 H, C(=O)OCH<sub>2</sub>CCl<sub>3</sub>), 4.63–4.58 (m, 2 H, H-1, H-3), 4.30–4.23 (m, 2 H, H-6a, H-6b), 4.13 (td, 1 H,  $J_{2,\text{OH}} = 2.6$  Hz,  $J_{1,2} = J_{2,3} = 9.6$  Hz, H-2), 3.50 (br s, 1 H, H-5), 2.54 (d, 1 H, OH-2), 1.04 (s, 9 H, <sup>t</sup>Bu), 1.00 (s, 9 H, <sup>t</sup>Bu); <sup>13</sup>C NMR (125 MHz, CDCl<sub>3</sub>)  $\delta$  153.5, 132.8, 129.1, 128.2, 94.3, 89.9, 81.4, 76.9, 74.9, 69.7, 67.1, 67.1, 27.5, 27.4, 23.3, 20.6; HRMS (ESI) *m/z*: found [M+Na]<sup>+</sup> 609.0675, C<sub>23</sub>H<sub>33</sub>Cl<sub>3</sub>O<sub>7</sub>SSi calcd for [M+Na]<sup>+</sup> 609.0674.

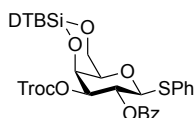

## Compound 4

To a solution of compound **S2** (4.42 g, 7.52 mmol) in pyridine (75 mL) were added Bz<sub>2</sub>O (2.56 g, 11.3 mmol) and DMAP (91.9 mg, 0.752 mmol) at  $0^{\circ}\text{C}$ . After stirring for 20 h at ambient temperature as the progress of the reaction was monitored by TLC (*n*-hexane/EtOAc = 3/1), the reaction was quenched with MeOH, and the mixture was co-evaporated with toluene, and diluted with CHCl<sub>3</sub>. The organic layer was washed with 2 M HCl, H<sub>2</sub>O, satd. aq. NaHCO<sub>3</sub> and brine, dried over Na<sub>2</sub>SO<sub>4</sub>, and concentrated. The residue was purified by silica gel column chromatography (*n*-hexane/EtOAc = 8/1) to give compound **4** (5.01 g, 96%) as a white foam;  $[\alpha]_{\text{D}} +62.5^{\circ}$  (c 1.0, CHCl<sub>3</sub>); <sup>1</sup>H NMR (500 MHz, CDCl<sub>3</sub>)  $\delta$  8.05–7.22 (m, 10 H, Ph), 5.79 (t, 1 H,  $J_{1,2} = J_{2,3} = 9.9$  Hz, H-2), 4.95 (dd, 1 H,  $J_{3,4} = 3.0$  Hz, H-3), 4.89 (d, 1 H, H-1), 4.80 (d, 1 H, H-4), 4.75 (d, 1 H,  $J_{\text{gem}} = 12.0$  Hz, C(=O)OCH<sub>2</sub>CCl<sub>3</sub>), 4.65 (d, 1 H, C(=O)OCH<sub>2</sub>CCl<sub>3</sub>), 4.33–4.27 (m, 2 H, H-6a, H-6b), 3.57 (br s, 1 H, H-5), 1.15 (s, 9 H, <sup>t</sup>Bu), 1.03 (s, 9 H, <sup>t</sup>Bu); <sup>13</sup>C NMR (125 MHz, CDCl<sub>3</sub>)  $\delta$  165.2, 153.7, 133.8, 133.4, 132.5, 129.9, 129.5, 128.9, 128.4, 127.9, 94.2, 87.6, 79.2, 76.8, 74.8, 70.3, 67.9, 67.0, 27.5, 27.5, 23.3, 20.7; HRMS (ESI) *m/z*: found [M+Na]<sup>+</sup>

713.0938, C<sub>30</sub>H<sub>37</sub>Cl<sub>3</sub>O<sub>8</sub>Si calcd for [M+Na]<sup>+</sup> 713.0936.

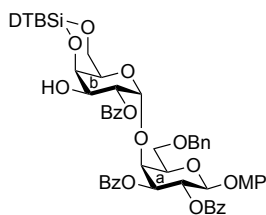

### Compound 7

To a solution of donor **4** (2.74 g, 3.96 mmol) and acceptor **5**<sup>502</sup> (1.34 g, 2.64 mmol) in CH<sub>2</sub>Cl<sub>2</sub> (66 mL) were added NIS (1.78 g, 7.92 mmol) and 4 Å molecular sieves (6.50 g). After stirring for 1 h at ambient temperature, TfOH (210 µL, 2.38 mmol) was added at 0 °C. After stirring for 3 h at 0 °C as the progress of the reaction was monitored by TLC (toluene/acetone = 5/2), the reaction mixture was neutralized with satd. aq. NaHCO<sub>3</sub> and filtered through a pad of Celite. The pad was washed with CHCl<sub>3</sub>. The combined filtrate and washings were diluted with CHCl<sub>3</sub> and washed with satd. aq. Na<sub>2</sub>S<sub>2</sub>O<sub>3</sub> and brine. The organic layer was dried over Na<sub>2</sub>SO<sub>4</sub> and concentrated. The residue was purified by silica gel column chromatography (toluene/EtOAc = 90/1) to obtain crude mixture of **6**, which was dissolved in AcOH (30 mL) and zinc powder (15.4 g, 236 mmol) was added. After stirring for 2.5 h at ambient temperature as the progress of the reaction was monitored by TLC (toluene/EtOAc = 12/1), the reaction mixture was filtered through a pad of Celite. The pad was washed with CHCl<sub>3</sub>. The combined filtrate and washings were co-evaporated with toluene and diluted with CHCl<sub>3</sub>. The organic layer was washed with satd. aq. Na<sub>2</sub>CO<sub>3</sub> and brine, dried over Na<sub>2</sub>SO<sub>4</sub>, and concentrated. The residue was purified by silica gel column chromatography (toluene/EtOAc = 20/1 → 6/1) to give compound **7** (2.04 g, 78%) as a white foam; [α]<sub>D</sub> +80.5° (c 1.0, CHCl<sub>3</sub>); <sup>1</sup>H NMR (500 MHz, CDCl<sub>3</sub>) δ 8.20–6.76 (m, 24 H, 5 Ar), 5.98 (dd, 1 H, *J*<sub>1,2</sub> = 7.7 Hz, *J*<sub>2,3</sub> = 10.7 Hz, H-2<sup>a</sup>), 5.44 (dd, 1 H, *J*<sub>1,2</sub> = 3.5 Hz, *J*<sub>2,3</sub> = 10.5 Hz, H-2<sup>b</sup>), 5.31 (dd, 1 H, *J*<sub>3,4</sub> = 2.8 Hz, H-3<sup>a</sup>), 5.16–5.14 (m, 2 H, H-1<sup>a</sup>, H-1<sup>b</sup>), 4.49 (d, 1 H, H-4<sup>a</sup>), 4.46 (d, 1 H, *J*<sub>3,4</sub> = 3.0 Hz, H-4<sup>b</sup>), 4.27 (td, 1 H, *J*<sub>3,OH</sub> = 11.5 Hz, H-3<sup>b</sup>), 4.22 (d, 1 H, *J*<sub>gem</sub> = 11.0 Hz, PhCH<sub>2</sub>), 4.16 (d, 1 H, PhCH<sub>2</sub>), 4.15 (br s, 1 H, H-5<sup>b</sup>), 3.95 (near t, 1 H, H-5<sup>a</sup>), 3.76 (s, 3 H, OMe), 3.69 (dd, 1 H, *J*<sub>5,6a</sub> = 7.5 Hz, *J*<sub>gem</sub> = 9.4 Hz, H-6a<sup>a</sup>), 3.54 (dd, 1 H, *J*<sub>5,6b</sub> = 6.3 Hz, H-6b<sup>a</sup>), 3.37 (m, 2 H, H-6a<sup>b</sup>, H-6b<sup>b</sup>), 2.49 (d, 1 H, OH-3<sup>b</sup>), 1.05 (s, 9 H, <sup>t</sup>Bu), 0.99 (s, 9 H, <sup>t</sup>Bu); <sup>13</sup>C NMR (125 MHz, CDCl<sub>3</sub>) δ 166.6, 165.7, 165.5, 155.7, 151.1, 137.2, 133.7, 133.3, 133.2, 130.3, 129.8, 129.7, 129.4, 129.0, 129.0, 128.7, 128.4, 128.4, 128.2, 128.0, 127.9, 119.2, 114.5, 101.0, 98.0, 77.2, 73.8, 73.8, 73.7, 73.4, 73.3, 71.1, 69.5, 68.6, 67.7, 67.2, 66.2, 55.6, 27.5, 27.3, 23.3, 20.7; HRMS (ESI) *m/z*: found [M+Na]<sup>+</sup> 1013.3752, C<sub>55</sub>H<sub>62</sub>O<sub>15</sub>Si calcd for [M+Na]<sup>+</sup> 1013.3750.

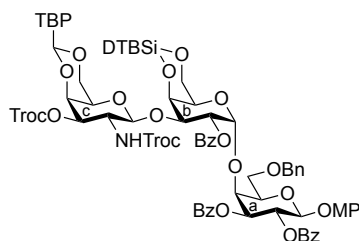

## Compound 9

To a solution of donor **8**<sup>503</sup> (2.98 g, 3.89 mmol) and acceptor **7** (3.86 g, 3.89 mmol) in CH<sub>2</sub>Cl<sub>2</sub> (78 mL) were added NIS (1.05 g, 4.67 mmol) and 4 Å molecular sieves (7.80 g). After stirring for 1 h at ambient temperature, TfOH (3.4 μL, 38.9 μmol) was added at –40 °C. After stirring for 2.5 h at –40 °C as the progress of the reaction was monitored by TLC (toluene/acetone = 20/1), the reaction mixture was neutralized with satd. aq. NaHCO<sub>3</sub> and filtered through a pad of Celite. The pad was washed with CHCl<sub>3</sub>. The combined filtrate and washings were diluted with CHCl<sub>3</sub> and washed with satd. aq. Na<sub>2</sub>S<sub>2</sub>O<sub>3</sub> and brine. The organic layer was dried over Na<sub>2</sub>SO<sub>4</sub> and concentrated. The residue was purified by silica gel column chromatography (toluene/EtOAc = 100/1) to give compound **9** (6.04 g, 94%) as a white foam; [α]<sub>D</sub> +107.3° (c 1.0, CHCl<sub>3</sub>); <sup>1</sup>H NMR (500 MHz, acetone-*d*<sub>6</sub>) δ 8.24–6.79 (m, 29 H, 6 Ar, NH-2<sup>c</sup>), 5.97 (dd, 1 H, *J*<sub>1,2</sub> = 7.9 Hz, *J*<sub>2,3</sub> = 10.8 Hz, H-2<sup>a</sup>), 5.80 (dd, 1 H, *J*<sub>1,2</sub> = 3.9 Hz, *J*<sub>2,3</sub> = 10.8 Hz, H-2<sup>b</sup>), 5.64 (s, 1 H, ArCH<), 5.56 (dd, 1 H, *J*<sub>3,4</sub> = 2.8 Hz, H-3<sup>a</sup>), 5.49 (d, 1 H, H-1<sup>a</sup>), 5.35 (d, 1 H, H-1<sup>b</sup>), 5.32 (d, 1 H, *J*<sub>1,2</sub> = 8.0 Hz, H-1<sup>c</sup>), 5.21 (dd, 1 H, *J*<sub>3,4</sub> = 3.5 Hz, *J*<sub>2,3</sub> = 11.5 Hz, H-3<sup>c</sup>), 5.10 (d, 1 H, *J*<sub>3,4</sub> = 2.4 Hz, H-4<sup>b</sup>), 4.87 (d, 1 H, *J*<sub>gem</sub> = 12.0 Hz, C(=O)OCH<sub>2</sub>CCl<sub>3</sub>), 4.80 (d, 1 H, C(=O)OCH<sub>2</sub>CCl<sub>3</sub>), 4.61 (d, 1 H, H-4<sup>c</sup>), 4.54 (d, 1 H, H-4<sup>a</sup>), 4.51 (dd, 1 H, H-3<sup>b</sup>), 4.36 (d, 1 H, *J*<sub>gem</sub> = 12.5 Hz, H-6a<sup>c</sup>), 4.29 (t, 1 H, *J*<sub>5,6a</sub> = *J*<sub>5,6b</sub> = 6.8 Hz, H-5<sup>a</sup>), 4.26–4.21 (m, 4 H, H-5<sup>b</sup>, H-6b<sup>c</sup>, PhCH<sub>2</sub>, C(=O)OCH<sub>2</sub>CCl<sub>3</sub>), 4.15 (d, 1 H, *J*<sub>gem</sub> = 11.5 Hz, PhCH<sub>2</sub>), 4.06 (near q, 1 H, *J*<sub>2,NH</sub> = 8.5 Hz, H-2<sup>c</sup>), 3.91 (s, 1 H, H-5<sup>c</sup>), 3.74–3.72 (m, 4 H, OMe, C(=O)OCH<sub>2</sub>CCl<sub>3</sub>), 3.64–3.54 (m, 3 H, H-6a<sup>a</sup>, H-6b<sup>a</sup>, H-6a<sup>b</sup>), 3.48 (dd, 1 H, *J*<sub>5,6b</sub> = 0.8 Hz, *J*<sub>gem</sub> = 12.3 Hz, H-6b<sup>b</sup>), 1.31 (s, 9 H, <sup>t</sup>Bu), 1.08 (s, 9 H, <sup>t</sup>Bu), 1.06 (s, 9 H, <sup>t</sup>Bu); <sup>13</sup>C NMR (125 MHz, acetone-*d*<sub>6</sub>) δ 166.6, 166.2, 156.6, 154.7, 154.2, 152.4, 152.2, 139.1, 136.8, 134.6, 134.3, 134.1, 131.3, 130.9, 130.6, 130.3, 130.2, 129.6, 129.5, 129.5, 129.1, 128.5, 128.4, 127.3, 125.5, 119.5, 115.3, 103.2, 101.6, 101.3, 98.8, 97.0, 95.5, 79.2, 78.3, 77.4, 76.7, 74.9, 74.7, 74.6, 74.4, 73.8, 73.5, 73.4, 70.8, 70.0, 69.6, 69.0, 68.8, 67.5, 67.0, 55.8, 53.2, 35.1, 31.6, 28.1, 28.0, 24.0, 21.3; HRMS (ESI) *m/z*: found [M+Na]<sup>+</sup> 1666.3463, C<sub>78</sub>H<sub>87</sub>Cl<sub>6</sub>NO<sub>23</sub>Si calcd for [M+Na]<sup>+</sup> 1666.3462.

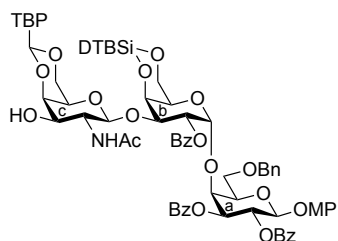

## Compound 10

To a solution of compound **9** (100 mg, 60.7  $\mu$ mol) in AcOH (2.5 mL) was added zinc powder (500 mg, 7.64 mmol). After stirring for 1 h at ambient temperature as the progress of the reaction was monitored by TLC (CHCl<sub>3</sub>/MeOH = 20/1), the reaction mixture was filtered through a pad of Celite. The pad was washed with CHCl<sub>3</sub>. The combined filtrate and washings were diluted with CHCl<sub>3</sub> and washed with satd. aq. Na<sub>2</sub>S<sub>2</sub>O<sub>3</sub> and brine. The organic layer was dried over Na<sub>2</sub>SO<sub>4</sub>, concentrated, and dried for 2 h. The residue was dissolved in CH<sub>2</sub>Cl<sub>2</sub> (5.0 mL), followed by the addition of Ac<sub>2</sub>O (8.60  $\mu$ L, 91.1  $\mu$ mol). After stirring for 1 h at ambient temperature as the progress of the reaction was monitored by TLC (CHCl<sub>3</sub>/MeOH = 20/1), the reaction mixture was concentrated. The residue was purified by silica gel column chromatography (CHCl<sub>3</sub>/EtOAc = 20/1) to give compound **10** (69.9 mg, 86%) as a white foam;  $[\alpha]_D^{+101.8^\circ}$  (c 1.0, CHCl<sub>3</sub>); <sup>1</sup>H NMR (500 MHz, CDCl<sub>3</sub>)  $\delta$  8.21–6.75 (m, 28 H, 6 Ar), 6.03 (dd, 1 H,  $J_{1,2}$  = 8.0 Hz,  $J_{2,3}$  = 10.9 Hz, H-2<sup>a</sup>), 5.74 (dd, 1 H,  $J_{1,2}$  = 4.0 Hz,  $J_{2,3}$  = 10.5 Hz, H-2<sup>b</sup>), 5.59 (d, 1 H,  $J_{2,NH}$  = 3.5 Hz, NH-2<sup>c</sup>), 5.55 (s, 1 H, ArCH<), 5.35 (dd, 1 H,  $J_{3,4}$  = 2.9 Hz, H-3<sup>a</sup>), 5.20 (d, 1 H, H-1<sup>b</sup>), 5.11 (d, 1 H, H-1<sup>a</sup>), 4.81 (d, 1 H,  $J_{3,OH}$  = 5.5 Hz, OH-3<sup>c</sup>), 4.76 (d, 1 H,  $J_{1,2}$  = 7.5 Hz, H-1<sup>c</sup>), 4.74 (d, 1 H,  $J_{3,4}$  = 2.5 Hz, H-4<sup>b</sup>), 4.51 (d, 1 H, H-4<sup>a</sup>), 4.41 (br d, 1 H,  $J_{gem}$  = 11.5 Hz, H-6a<sup>c</sup>), 4.29 (dd, 1 H, H-3<sup>b</sup>), 4.18–4.15 (m, 2 H, H-4<sup>c</sup>, PhCH<sub>2</sub>), 4.12 (d, 1 H,  $J_{gem}$  = 11.0 Hz, PhCH<sub>2</sub>), 4.11 (br d, 1 H, H-6b<sup>c</sup>), 4.04 (br s, 1 H, H-5<sup>b</sup>), 3.94 (near t, 1 H, H-5<sup>a</sup>), 3.88–3.80 (m, 2 H, H-2<sup>c</sup>, H-3<sup>c</sup>), 3.76 (s, 3 H, OMe), 3.63 (br s, 1 H, H-5<sup>c</sup>), 3.57 (dd, 1 H,  $J_{5,6a}$  = 7.3 Hz,  $J_{gem}$  = 9.3 Hz, H-6a<sup>a</sup>), 3.48 (dd, 1 H,  $J_{5,6b}$  = 6.8 Hz, H-6b<sup>a</sup>), 3.34–3.28 (m, 2 H, H-6a<sup>b</sup>, H-6b<sup>b</sup>), 1.41 (s, 3 H, Ac), 1.31 (s, 9 H, <sup>t</sup>Bu), 1.06 (s, 9 H, <sup>t</sup>Bu), 0.99 (s, 9 H, <sup>t</sup>Bu); <sup>13</sup>C NMR (125 MHz, CDCl<sub>3</sub>)  $\delta$  172.8, 166.1, 165.8, 165.7, 155.7, 152.0, 151.3, 137.2, 135.1, 133.8, 133.8, 133.4, 130.2, 129.7, 129.7, 129.3, 129.2, 128.9, 128.8, 128.5, 128.4, 128.0, 127.9, 126.4, 125.0, 119.1, 114.5, 101.9, 101.5, 101.5, 97.7, 76.3, 75.0, 73.8, 73.6, 73.5, 73.3, 73.0, 71.9, 69.7, 69.5, 69.1, 68.0, 67.2, 66.9, 66.4, 55.7, 55.6, 34.6, 31.3, 27.5, 23.4, 22.6, 20.6; HRMS (ESI)  $m/z$ : found [M+Na]<sup>+</sup> 1360.5485, C<sub>74</sub>H<sub>87</sub>NO<sub>20</sub>Si calcd for [M+Na]<sup>+</sup> 1360.5483.

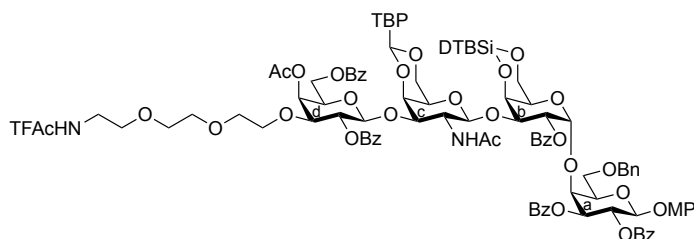

## Compound 12

To a solution of donor **11** (208 mg, 0.259 mmol) and acceptor **10** (347 mg, 0.259 mmol) in  $\text{CH}_2\text{Cl}_2$  (5.2 mL) was added 4 Å molecular sieves (AW-300, 700 mg). After stirring for 1 h at ambient temperature, TMSOTf (4.7  $\mu\text{L}$ , 25.9  $\mu\text{mol}$ ) was added at 0 °C. After stirring for 4 h at 0 °C as the progress of the reaction was monitored by TLC (toluene/ $\text{CHCl}_3$ /EtOAc = 3/1/1), the reaction mixture was neutralized with satd. aq.  $\text{NaHCO}_3$  and filtered through a pad of Celite. The pad was washed with  $\text{CHCl}_3$ . The combined filtrate and washings were diluted with  $\text{CHCl}_3$  and washed with brine. The organic layer was dried over  $\text{Na}_2\text{SO}_4$  and concentrated. The residue was purified by silica gel column chromatography (toluene/ $\text{CHCl}_3$ /EtOAc = 5/1/1) to give compound **12** (432 mg, 84%) as a white amorphous solid;  $[\alpha]_D^{+25} +61.5^\circ$  (c 1.0,  $\text{CHCl}_3$ );  $^1\text{H}$  NMR (500 MHz,  $\text{CDCl}_3$ )  $\delta$  8.08–6.72 (m, 39 H, 8 Ar,  $\text{CF}_3\text{C}(=\text{O})\text{NH}$ ), 5.92 (dd, 1 H,  $J_{1,2} = 8.0$  Hz,  $J_{2,3} = 11.0$  Hz, H-2<sup>a</sup>), 5.58–5.55 (m, 2 H, H-2<sup>b</sup>, H-4<sup>d</sup>), 5.41 (s, 1 H, ArCH<), 5.34–5.28 (m, 3 H, H-3<sup>a</sup>, H-2<sup>d</sup>, NH-2<sup>c</sup>), 5.23 (d, 1 H,  $J_{1,2} = 8.5$  Hz, H-1<sup>c</sup>), 5.15 (d, 1 H,  $J_{1,2} = 3.8$  Hz, H-1<sup>b</sup>), 5.08 (d, 1 H, H-1<sup>a</sup>), 4.84 (dd, 1 H,  $J_{3,4} = 3.3$  Hz,  $J_{2,3} = 11.3$  Hz, H-3<sup>c</sup>), 4.72 (d, 1 H,  $J_{1,2} = 8.0$  Hz, H-1<sup>d</sup>), 4.68 (d, 1 H,  $J_{3,4} = 2.8$  Hz, H-4<sup>b</sup>), 4.60 (dd, 1 H,  $J_{5,6a} = 7.7$  Hz,  $J_{\text{gem}} = 11.5$  Hz, H-6a<sup>d</sup>), 4.37 (d, 1 H,  $J_{3,4} = 3.0$  Hz, H-4<sup>a</sup>), 4.30–4.27 (m, 2 H, H-4<sup>c</sup>, H-6b<sup>d</sup>), 4.22 (dd, 1 H,  $J_{2,3} = 10.5$  Hz, H-3<sup>b</sup>), 4.18 (br d, 1 H,  $J_{\text{gem}} = 11.3$  Hz, H-6a<sup>c</sup>), 4.08–4.03 (m, 3 H, H-5<sup>b</sup>, 2  $\text{PhCH}_2$ ), 4.01 (dd, 1 H,  $J_{5,6b} = 4.9$  Hz, H-5<sup>d</sup>), 3.88 (t, 1 H,  $J_{5,6a} = J_{5,6b} = 6.5$  Hz, H-5<sup>a</sup>), 3.75 (s, 3 H, OMe), 3.71–3.67 (m, 2 H, H-3<sup>d</sup>,  $\text{OCH}_2$ ), 3.63 (br d, 1 H, H-6b<sup>c</sup>), 3.51–3.25 (m, 17 H, H-6a<sup>a</sup>, H-6b<sup>a</sup>, H-6a<sup>b</sup>, H-6b<sup>b</sup>, H-2<sup>c</sup>, H-5<sup>c</sup>, 9  $\text{OCH}_2$ , 2  $\text{NHCH}_2$ ), 2.20 (s, 3 H, Ac), 1.33 (s, 9 H, <sup>t</sup>Bu), 0.99 (s, 9 H, <sup>t</sup>Bu), 0.89 (s, 9 H, <sup>t</sup>Bu), 0.66 (s, 3 H, Ac);  $^{13}\text{C}$  NMR (125 MHz,  $\text{CDCl}_3$ )  $\delta$  171.0, 170.7, 166.0, 166.0, 165.9, 165.5, 164.9, 157.4, 157.1, 155.6, 151.5, 151.3, 137.5, 135.5, 133.6, 133.6, 133.3, 133.3, 133.1, 130.3, 129.9, 129.8, 129.7, 129.6, 129.4, 129.4, 128.9, 128.7, 128.5, 128.4, 128.4, 128.3, 127.7, 126.3, 124.9, 118.9, 117.1, 114.8, 114.4, 102.5, 101.2, 100.8, 99.6, 98.0, 78.9, 76.0, 74.9, 74.1, 74.0, 73.9, 73.5, 73.2, 71.3, 71.0, 70.8, 70.5, 70.2, 70.1, 69.6, 69.4, 69.0, 68.6, 68.1, 68.0, 66.7, 66.5, 66.2, 62.9, 55.6, 54.9, 39.6, 34.6, 31.3, 27.5, 27.3, 23.3, 22.4, 20.9, 20.6; HRMS (ESI)  $m/z$ : found  $[\text{M}+\text{Na}]^+$  1999.7412,  $\text{C}_{104}\text{H}_{119}\text{F}_3\text{N}_2\text{O}_{31}\text{Si}$  calcd for  $[\text{M}+\text{Na}]^+$  1999.7410.

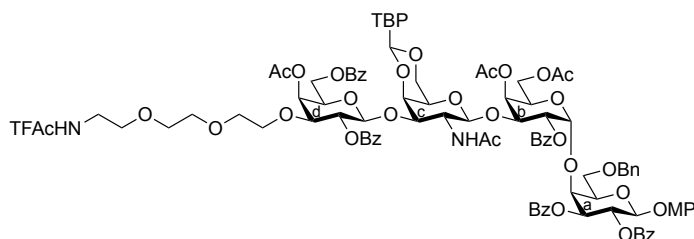

### Compound 13

To a solution of compound **12** (893 mg, 0.451 mmol) in THF (4.5 mL) was added 1 M TBAHF in THF (4.51 mL, 4.51 mmol). After stirring for 14 h at ambient temperature as the progress of the reaction was monitored by TLC (*n*-hexane/acetone = 1/1), the reaction mixture was diluted with CHCl<sub>3</sub> and washed with 2 M HCl, H<sub>2</sub>O, satd. aq. NaHCO<sub>3</sub> and brine. The organic layer was dried over Na<sub>2</sub>SO<sub>4</sub>, concentrated and dried for 2 h. The residue was dissolved in pyridine (4.5 mL), followed by the addition of Ac<sub>2</sub>O (170 μL, 1.80 mmol) and DMAP (5.5 mg, 45.1 μmol) at 0 °C. After stirring for 20 h at ambient temperature as the progress of the reaction was monitored by TLC (*n*-hexane/acetone = 1/1), the reaction was quenched with MeOH at 0 °C and diluted with CHCl<sub>3</sub>. The organic layer was washed with 2 M HCl, H<sub>2</sub>O, satd. aq. NaHCO<sub>3</sub> and brine, dried over Na<sub>2</sub>SO<sub>4</sub>, and concentrated. The residue was purified by silica gel column chromatography (*n*-hexane/acetone = 4/3) to give compound **13** (736 mg, 85%) as a white amorphous solid; [α]<sub>D</sub> +60.3° (c 1.0, CHCl<sub>3</sub>); <sup>1</sup>H NMR (500 MHz, CDCl<sub>3</sub>) δ 8.09–6.73 (m, 39 H, 8 Ar, CF<sub>3</sub>C(=O)NH), 6.01 (dd, 1 H, *J*<sub>1,2</sub> = 7.7 Hz, *J*<sub>2,3</sub> = 10.8 Hz, H-2<sup>a</sup>), 5.56 (d, 1 H, *J*<sub>3,4</sub> = 3.2 Hz, H-4<sup>d</sup>), 5.49 (dd, 1 H, *J*<sub>1,2</sub> = 4.0 Hz, *J*<sub>2,3</sub> = 10.5 Hz, H-2<sup>b</sup>), 5.44 (d, 1 H, *J*<sub>3,4</sub> = 2.5 Hz, H-4<sup>b</sup>), 5.36–5.33 (m, 2 H, H-3<sup>a</sup>, ArCH<), 5.31 (dd, 1 H, *J*<sub>1,2</sub> = 8.3 Hz, *J*<sub>2,3</sub> = 9.8 Hz, H-2<sup>d</sup>), 5.22 (d, 1 H, *J*<sub>1,2</sub> = 8.0 Hz, H-1<sup>c</sup>), 5.19 (d, 1 H, H-1<sup>b</sup>), 5.09 (d, 1 H, H-1<sup>a</sup>), 5.01 (d, 1 H, *J*<sub>2,NH</sub> = 6.5 Hz, NH-2<sup>c</sup>), 4.72–4.69 (m, 2 H, H-3<sup>c</sup>, H-1<sup>d</sup>), 4.58 (dd, 1 H, *J*<sub>5,6a</sub> = 7.4 Hz, *J*<sub>gem</sub> = 11.4 Hz, H-6a<sup>d</sup>), 4.50 (d, 1 H, *J*<sub>3,4</sub> = 3.0 Hz, H-4<sup>a</sup>), 4.47–4.44 (m, 2 H, H-3<sup>b</sup>, H-4<sup>c</sup>), 4.29 (dd, 1 H, *J*<sub>5,6b</sub> = 5.3 Hz, H-6b<sup>d</sup>), 4.25–4.22 (m, 2 H, H-5<sup>b</sup>, PhCH<sub>2</sub>), 4.19 (br d, 1 H, *J*<sub>gem</sub> = 11.5 Hz, H-6a<sup>c</sup>), 4.10 (d, 1 H, *J*<sub>gem</sub> = 12.0 Hz, PhCH<sub>2</sub>), 4.04 (dd, 1 H, H-5<sup>d</sup>), 3.90 (t, 1 H, *J*<sub>5,6a</sub> = *J*<sub>5,6b</sub> = 7.0 Hz, H-5<sup>a</sup>), 3.76 (s, 3 H, OMe), 3.72–3.67 (m, 2 H, H-3<sup>d</sup>, OCH<sub>2</sub>), 3.58 (br d, 1 H, H-6b<sup>c</sup>), 3.52–3.27 (m, 16 H, H-6a<sup>a</sup>, H-6b<sup>a</sup>, H-6a<sup>b</sup>, H-6b<sup>b</sup>, H-5<sup>c</sup>, 9 OCH<sub>2</sub>, 2 NHCH<sub>2</sub>), 3.19 (m, 1 H, H-2<sup>c</sup>), 2.19 (s, 3 H, Ac), 2.04 (s, 3 H, Ac), 1.79 (s, 3 H, Ac), 1.31 (s, 9 H, <sup>t</sup>Bu), 0.94 (s, 3 H, Ac); <sup>13</sup>C NMR (125 MHz, CDCl<sub>3</sub>) δ 171.1, 170.7, 170.1, 169.9, 166.0, 165.9, 165.8, 165.4, 164.9, 157.4, 157.1, 155.6, 151.7, 151.3, 137.3, 135.5, 133.6, 133.6, 133.3, 133.1, 130.2, 129.9, 129.7, 129.7, 129.6, 129.5, 129.4, 128.8, 128.7, 128.4, 128.4, 127.8, 127.7, 126.4, 125.0, 119.0, 117.1, 114.5, 102.5, 101.1, 101.0, 98.4, 96.8, 78.8, 76.2, 75.8, 73.7, 73.5, 73.2, 72.8, 72.5, 71.3, 71.1, 70.9, 70.5, 70.2, 70.1, 69.7, 69.5, 68.8, 68.6, 67.2, 66.7, 66.5, 62.9, 61.5, 55.7, 54.7, 39.6, 34.6, 31.3, 29.3, 22.6, 20.9, 20.9, 20.6; HRMS (ESI) *m/z*: found [M+Na]<sup>+</sup> 1943.6601, C<sub>100</sub>H<sub>107</sub>F<sub>3</sub>N<sub>2</sub>O<sub>33</sub> calcd for [M+Na]<sup>+</sup> 1943.6600.

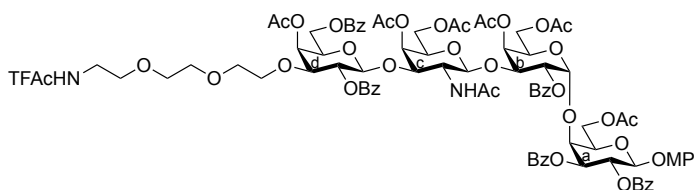

## Compound 14

To a solution of compound **13** (736 mg, 0.383 mmol) in 1,4-dioxane/MeOH = 1/1 (19 mL) was added Pd(OH)<sub>2</sub>-C (53.8 mg, 20% on carbon). After stirring for 16 h at ambient temperature under H<sub>2</sub> gas as the progress of the reaction was monitored by TLC (CHCl<sub>3</sub>/MeOH = 20/1), the reaction mixture was filtered through a pad of Celite, the pad was washed with CHCl<sub>3</sub>, the combined filtrate and washings were concentrated, co-evaporated with toluene, and dried for 2 h. The residue was dissolved in pyridine (3.8 mL), followed by the addition of Ac<sub>2</sub>O (145  $\mu$ L, 1.53 mmol) and DMAP (4.7 mg, 38.3  $\mu$ mol) at 0 °C. After stirring for 20 h at ambient temperature as the progress of the reaction was monitored by TLC (CHCl<sub>3</sub>/MeOH = 20/1), Ac<sub>2</sub>O (145  $\mu$ L, 1.53 mmol) was added to complete the reaction. After stirring for another 49 h, the reaction was quenched with MeOH at 0 °C, and the mixture was co-evaporated with toluene, and diluted with CHCl<sub>3</sub>. The organic layer was washed with 2 M HCl, H<sub>2</sub>O, satd. aq. NaHCO<sub>3</sub> and brine, dried over Na<sub>2</sub>SO<sub>4</sub>, and concentrated. The residue was purified by silica gel column chromatography (toluene/acetone = 3/1) to give compound **14** (607 mg, 87%) as a white amorphous solid; [ $\alpha$ ]<sub>D</sub> +72.7° (c 1.0, CHCl<sub>3</sub>); <sup>1</sup>H NMR (500 MHz, CDCl<sub>3</sub>)  $\delta$  8.06–6.78 (m, 30 H, 6 Ar, CF<sub>3</sub>C(=O)NH), 5.93 (dd, 1 H, *J*<sub>1,2</sub> = 7.8 Hz, *J*<sub>2,3</sub> = 10.5 Hz, H-2<sup>a</sup>), 5.54 (m, 2 H, H-4<sup>b</sup>, H-4<sup>d</sup>), 5.48 (d, 1 H, *J*<sub>3,4</sub> = 3.5 Hz, H-4<sup>c</sup>), 5.42 (dd, 1 H, *J*<sub>1,2</sub> = 3.5 Hz, *J*<sub>2,3</sub> = 10.5 Hz, H-2<sup>b</sup>), 5.29 (dd, 1 H, *J*<sub>3,4</sub> = 3.0 Hz, H-3<sup>a</sup>), 5.23 (dd, 1 H, *J*<sub>1,2</sub> = 7.9 Hz, *J*<sub>2,3</sub> = 9.9 Hz, H-2<sup>d</sup>), 5.21 (d, 1 H, *J*<sub>1,2</sub> = 8.0 Hz, H-1<sup>c</sup>), 5.17 (d, 1 H, H-1<sup>b</sup>), 5.11 (d, 1 H, H-1<sup>a</sup>), 5.08 (d, 1 H, *J*<sub>2,NH</sub> = 6.5 Hz, NH-2<sup>c</sup>), 4.77 (dd, 1 H, *J*<sub>2,3</sub> = 11.0 Hz, H-3<sup>c</sup>), 4.62 (d, 1 H, H-1<sup>d</sup>), 4.50 (near t, 1 H, *J*<sub>5,6b</sub> = 6.0 Hz, *J*<sub>5,6a</sub> = 7.0 Hz, H-5<sup>c</sup>), 4.47 (dd, 1 H, *J*<sub>5,6a</sub> = 6.8 Hz, *J*<sub>gem</sub> = 11.4 Hz, H-6a<sup>d</sup>), 4.43–4.40 (m, 2 H, H-3<sup>b</sup>, H-6a<sup>b</sup>), 4.35 (d, 1 H, H-4<sup>a</sup>), 4.31 (dd, 1 H, *J*<sub>5,6b</sub> = 6.5 Hz, H-6b<sup>d</sup>), 4.10 (dd, 1 H, *J*<sub>5,6a</sub> = 5.0 Hz, *J*<sub>gem</sub> = 11.5 Hz, H-6a<sup>a</sup>), 4.02–3.93 (m, 4 H, H-6b<sup>a</sup>, H-5<sup>b</sup>, H-6b<sup>b</sup>, H-5<sup>d</sup>), 3.87 (near t, 1 H, *J*<sub>5,6b</sub> = 7.0 Hz, H-5<sup>a</sup>), 3.80–3.75 (m, 4 H, H-6a<sup>c</sup>, OMe), 3.70 (m, 1 H, OCH<sub>2</sub>), 3.65 (dd, 1 H, *J*<sub>3,4</sub> = 3.0 Hz, H-3<sup>d</sup>), 3.53 (dd, 1 H, *J*<sub>gem</sub> = 11.0 Hz, H-6b<sup>c</sup>), 3.51–3.23 (m, 11 H, 9 OCH<sub>2</sub>, 2 NHCH<sub>2</sub>), 3.02 (m, 1 H, H-2<sup>c</sup>), 2.16 (s, 3 H, Ac), 2.12 (s, 3 H, Ac), 2.07 (s, 3 H, Ac), 2.05 (s, 3 H, Ac), 1.88 (s, 3 H, Ac), 1.87 (s, 3 H, Ac), 0.73 (s, 3 H, Ac); <sup>13</sup>C NMR (125 MHz, CDCl<sub>3</sub>)  $\delta$  170.8, 170.6, 170.4, 170.3, 170.0, 170.0, 169.1, 166.2, 166.1, 165.8, 165.2, 165.0, 157.4, 155.7, 151.1, 133.7, 133.6, 133.4, 133.3, 130.0, 129.9, 129.7, 129.7, 129.6, 129.3, 128.9, 128.7, 128.6, 128.6, 128.5, 128.5, 128.5, 118.8, 117.1, 114.5, 101.7, 101.0, 98.7, 98.4, 78.6, 77.6, 74.8, 74.6, 73.4, 72.4, 72.0, 71.5, 71.4, 70.8, 70.8, 70.4, 70.2, 70.2, 70.1, 70.0, 69.4, 69.2, 68.5, 67.7, 66.4, 62.6, 62.0, 61.3, 61.0, 55.7, 55.5, 39.6, 22.2, 20.8, 20.7, 20.6, 20.5;



HRMS (ESI)  $m/z$ : found  $[M+Na]^+$  1835.5513,  $C_{88}H_{95}F_3N_2O_{36}$  calcd for  $[M+Na]^+$  1835.5509.

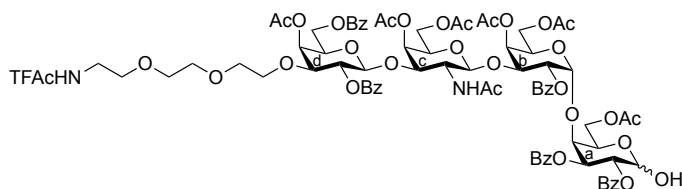

### Compound 15

To a solution of compound **14** (595 mg, 0.328 mmol) in MeCN/toluene/H<sub>2</sub>O = 6/5/3 (6.6 mL) was added cerium (IV) ammonium nitrate (1.80 g, 3.28 mmol) at 0 °C. After stirring for 4 h at 0 °C as the progress of the reaction was monitored by TLC (CHCl<sub>3</sub>/MeOH = 30/1, developed twice), the reaction mixture was diluted with EtOAc. The organic layer was washed with H<sub>2</sub>O, satd. aq. NaHCO<sub>3</sub> and brine, dried over Na<sub>2</sub>SO<sub>4</sub>, and concentrated. The residue was purified by silica gel column chromatography (CHCl<sub>3</sub>/MeOH = 80/1) to give compound **15** (349 mg, 62%,  $\alpha:\beta$  = 1:0.3) as a white amorphous solid;  $\alpha$  isomer; <sup>1</sup>H NMR (500 MHz, CDCl<sub>3</sub>)  $\delta$  8.06–7.33 (m, 25 H, 5 Ph), 7.17 (br s, 1 H, CF<sub>3</sub>C(=O)NH), 5.75 (dd, 1 H,  $J_{3,4}$  = 3.0 Hz,  $J_{2,3}$  = 10.9 Hz, H-3<sup>a</sup>), 5.71 (near t, 1 H,  $J_{1,OH}$  = 3.0 Hz,  $J_{1,2}$  = 3.4 Hz, H-1<sup>a</sup>), 5.61 (dd, 1 H, H-2<sup>a</sup>), 5.55 (m, 1 H, H-4<sup>d</sup>), 5.51–5.49 (m, 2 H, H-4<sup>b</sup>, H-4<sup>c</sup>), 5.41 (dd, 1 H,  $J_{1,2}$  = 3.4 Hz,  $J_{2,3}$  = 10.3 Hz, H-2<sup>b</sup>), 5.26–5.21 (m, 2 H, H-1<sup>c</sup>, H-2<sup>d</sup>), 5.19 (d, 1 H, H-1<sup>b</sup>), 5.11 (d, 1 H,  $J_{2,NH}$  = 6.5 Hz, NH-2<sup>c</sup>), 4.76 (dd, 1 H,  $J_{3,4}$  = 3.8 Hz,  $J_{2,3}$  = 10.8 Hz, H-3<sup>c</sup>), 4.62 (d, 1 H,  $J_{1,2}$  = 7.5 Hz, H-1<sup>d</sup>), 4.50–4.46 (m, 2 H, H-5<sup>c</sup>, H-6a<sup>d</sup>), 4.40–4.36 (m, 2 H, H-3<sup>b</sup>, H-6a<sup>b</sup>), 4.33–4.28 (m, 2 H, H-4<sup>a</sup>, H-6b<sup>d</sup>), 4.12 (dd, 1 H,  $J_{5,6a}$  = 5.0 Hz,  $J_{gem}$  = 11.5 Hz, H-6a<sup>a</sup>), 4.02–3.99 (m, 2 H, H-6b<sup>a</sup>, H-6b<sup>b</sup>), 3.96–3.94 (m, 2 H, H-5<sup>b</sup>, H-5<sup>d</sup>), 3.86 (near t, 1 H, H-5<sup>a</sup>), 3.77–3.64 (m, 3 H, H-6a<sup>c</sup>, H-3<sup>d</sup>, OCH<sub>2</sub>), 3.59 (dd, 1 H,  $J_{5,6b}$  = 7.0 Hz,  $J_{gem}$  = 11.4 Hz, H-6b<sup>c</sup>), 3.51–3.24 (m, 11 H, 9 OCH<sub>2</sub>, 2 NHCH<sub>2</sub>), 3.02 (m, 1 H, H-2<sup>c</sup>), 2.80 (d, 1 H, OH-1<sup>a</sup>), 2.17 (s, 3 H, Ac), 2.12 (s, 3 H, Ac), 2.06 (s, 3 H, Ac), 2.05 (s, 3 H, Ac), 1.87 (s, 3 H, Ac), 1.70 (s, 3 H, Ac), 0.72 (s, 3 H, Ac); HRMS (ESI)  $m/z$ : found  $[M+Na]^+$  1729.5090,  $C_{81}H_{89}F_3N_2O_{35}$  calcd for  $[M+Na]^+$  1729.5090.

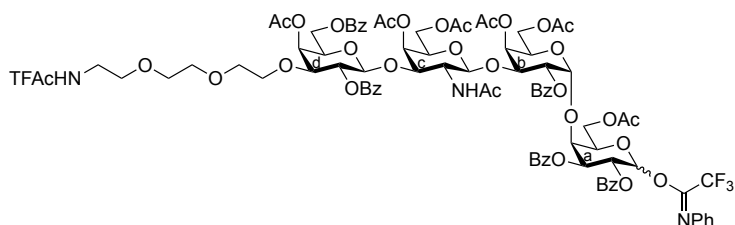

### Compound 16

To a solution of compound **15** (32.7 mg, 19.1  $\mu$ mol) in acetone (0.38 mL) were added CF<sub>3</sub>C(=NPh)Cl (6.2  $\mu$ L, 38.3  $\mu$ mol) and K<sub>2</sub>CO<sub>3</sub> (13.2 mg, 95.7  $\mu$ mol). After stirring for 6 h at ambient temperature as

the progress of the reaction was monitored by TLC (CHCl<sub>3</sub>/MeOH = 20/1), the reaction mixture was concentrated. The residue was purified by silica gel column chromatography (CHCl<sub>3</sub>/MeOH = 80/1) to give compound **16** (33.9 mg, 94%,  $\alpha:\beta$  = 1:0.3) as a white amorphous solid;  $\alpha$  isomer; <sup>1</sup>H NMR (500 MHz, CDCl<sub>3</sub>)  $\delta$  8.06–6.48 (m, 31 H, 6 Ph, CF<sub>3</sub>C(=O)NH), 6.05 (br s, 1 H, H-1<sup>a</sup>), 5.87 (br dd, 1 H, H-2<sup>a</sup>), 5.74 (br dd, 1 H, H-3<sup>a</sup>), 5.55 (d, 1 H,  $J_{3,4}$  = 3.5 Hz, H-4<sup>d</sup>), 5.52 (d, 1 H,  $J_{3,4}$  = 3.5 Hz, H-4<sup>b</sup>), 5.49 (d, 1 H,  $J_{3,4}$  = 3.3 Hz, H-4<sup>c</sup>), 5.41 (dd, 1 H,  $J_{1,2}$  = 4.0 Hz,  $J_{2,3}$  = 10.5 Hz, H-2<sup>b</sup>), 5.25–5.19 (m, 3 H, H-1<sup>b</sup>, H-1<sup>c</sup>, H-2<sup>d</sup>), 5.13 (d, 1 H,  $J_{2,NH}$  = 6.5 Hz, NH-2<sup>c</sup>), 4.75 (dd, 1 H,  $J_{2,3}$  = 11.0 Hz, H-3<sup>c</sup>), 4.63 (d, 1 H,  $J_{1,2}$  = 8.0 Hz, H-1<sup>d</sup>), 4.50–4.46 (m, 2 H, H-5<sup>c</sup>, H-6a<sup>d</sup>), 4.42 (br s, 1 H, H-4<sup>a</sup>), 4.39–4.36 (m, 2 H, H-3<sup>b</sup>, H-5<sup>b</sup>), 4.33–4.27 (m, 2 H, H-6a<sup>b</sup>, H-6b<sup>d</sup>), 4.12 (dd, 1 H,  $J_{5,6a}$  = 5.5 Hz,  $J_{gem}$  = 11.5 Hz, H-6a<sup>a</sup>), 4.04–3.97 (m, 2 H, H-6b<sup>a</sup>, H-6b<sup>b</sup>), 3.95 (near t, 1 H, H-5<sup>d</sup>), 3.86 (near t, 1 H, H-5<sup>a</sup>), 3.76 (dd, 1 H,  $J_{5,6a}$  = 6.3 Hz,  $J_{gem}$  = 11.3 Hz, H-6a<sup>c</sup>), 3.72–3.64 (m, 2 H, H-3<sup>d</sup>, OCH<sub>2</sub>), 3.61 (dd, 1 H,  $J_{5,6b}$  = 6.5 Hz, H-6b<sup>c</sup>), 3.50–3.24 (m, 11 H, 9 OCH<sub>2</sub>, 2 NHCH<sub>2</sub>), 3.03 (m, 1 H, H-2<sup>c</sup>), 2.16 (s, 3 H, Ac), 2.12 (s, 3 H, Ac), 2.06 (s, 3 H, Ac), 2.05 (s, 3 H, Ac), 1.90 (s, 3 H, Ac), 1.75 (s, 3 H, Ac), 0.73 (s, 3 H, Ac); HRMS (ESI)  $m/z$ : found [M+Na]<sup>+</sup> 1900.5390, C<sub>89</sub>H<sub>93</sub>F<sub>6</sub>N<sub>3</sub>O<sub>35</sub> calcd for [M+Na]<sup>+</sup> 1900.5386.

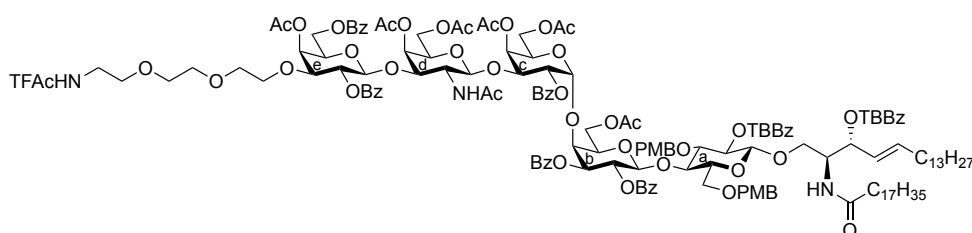

## Compound 18

To a solution of donor **16** (50.0 mg, 26.6  $\mu$ mol) and acceptor **17**<sup>S03</sup> (51.4 mg, 39.9  $\mu$ mol) in CH<sub>2</sub>Cl<sub>2</sub> (1.3 mL) was added 4 Å molecular sieves (AW-300, 130 mg). After stirring for 1 h at ambient temperature, TMSOTf (0.96  $\mu$ L, 5.32  $\mu$ mol) was added at 0 °C. After stirring for 3 h at 0 °C as the progress of the reaction was monitored by TLC (toluene/acetone = 3/1), the reaction mixture was neutralized with satd. aq. NaHCO<sub>3</sub> and filtered through a pad of Celite. The pad was washed with CHCl<sub>3</sub>. The combined filtrate and washings were diluted with CHCl<sub>3</sub> and washed with brine. The organic layer was dried over Na<sub>2</sub>SO<sub>4</sub> and concentrated. The residue was purified by silica gel column chromatography (toluene/acetone = 10/1  $\rightarrow$  4/1) to give compound **18** (51.4 mg, 65%) as a white amorphous solid; [ $\alpha$ ]<sub>D</sub> +50.7° (c 1.9, CHCl<sub>3</sub>); <sup>1</sup>H NMR (500 MHz, CDCl<sub>3</sub>)  $\delta$  8.06–6.66 (m, 42 H, 9 Ar, CF<sub>3</sub>C(=O)NH), 5.78 (near quin, 1 H,  $J_{5,6a}$  =  $J_{5,6b}$  = 6.5 Hz,  $J_{4,5}$  = 15.5 Hz, H-5<sup>Cer</sup>), 5.68–5.64 (m, 2 H, H-2<sup>b</sup>, NH-2<sup>Cer</sup>), 5.53 (d, 1 H,  $J_{3,4}$  = 3.0 Hz, H-4<sup>e</sup>), 5.46 (t, 1 H,  $J_{2,3}$  =  $J_{3,4}$  = 7.4 Hz, H-3<sup>Cer</sup>), 5.44 (d, 1 H,  $J_{3,4}$  = 2.0 Hz, H-4<sup>c</sup>), 5.39 (dd, 1 H, H-4<sup>Cer</sup>), 5.34–5.31 (m, 2 H, H-2<sup>c</sup>, H-4<sup>d</sup>), 5.19 (dd, 1 H,  $J_{1,2}$  = 8.0 Hz,  $J_{2,3}$  = 9.5 Hz, H-2<sup>e</sup>), 5.17–5.13

(m, 2 H, H-2<sup>a</sup>, H-1<sup>c</sup>), 5.09 (dd, 1 H,  $J_{3,4} = 2.8$  Hz,  $J_{2,3} = 10.8$  Hz, H-3<sup>b</sup>), 5.03 (d, 1 H,  $J_{2,\text{NH}} = 7.0$  Hz, NH-2<sup>d</sup>), 4.94 (d, 1 H,  $J_{1,2} = 8.0$  Hz, H-1<sup>d</sup>), 4.91 (d, 1 H,  $J_{1,2} = 8.0$  Hz, H-1<sup>b</sup>), 4.67 (d, 1 H,  $J_{\text{gem}} = 11.8$  Hz, ArCH<sub>2</sub>), 4.62 (d, 1 H, ArCH<sub>2</sub>), 4.58 (d, 1 H, H-1<sup>e</sup>), 4.54 (dd, 1 H,  $J_{3,4} = 3.5$  Hz,  $J_{2,3} = 11.0$  Hz, H-3<sup>d</sup>), 4.48 (dd, 1 H,  $J_{5,6a} = 6.5$  Hz,  $J_{\text{gem}} = 11.0$  Hz, H-6a<sup>e</sup>), 4.43–4.41 (m, 2 H, H-5<sup>d</sup>, ArCH<sub>2</sub>), 4.37–4.22 (m, 6 H, H-1<sup>a</sup>, H-4<sup>b</sup>, H-3<sup>c</sup>, H-6b<sup>e</sup>, H-1a<sup>Cer</sup>, H-2<sup>Cer</sup>), 4.11–4.05 (m, 2 H, H-4<sup>a</sup>, ArCH<sub>2</sub>), 4.00–3.91 (m, 4 H, H-6a<sup>b</sup>, H-6a<sup>c</sup>, H-5<sup>e</sup>, H-1b<sup>Cer</sup>), 3.83–3.67 (m, 10 H, H-3<sup>a</sup>, H-6b<sup>b</sup>, H-5<sup>c</sup>, H-6a<sup>d</sup>, 2 OMe), 3.62–3.22 (m, 19 H, H-5<sup>a</sup>, H-6a<sup>a</sup>, H-6b<sup>a</sup>, H-5<sup>b</sup>, H-6b<sup>c</sup>, H-6b<sup>d</sup>, H-3<sup>e</sup>, 10 OCH<sub>2</sub>, 2 NHCH<sub>2</sub>), 2.97 (m, 1 H, H-2<sup>d</sup>), 2.15 (s, 3 H, Ac), 2.08 (s, 3 H, Ac), 2.07 (s, 3 H, Ac), 2.01 (s, 3 H, Ac), 1.96–1.92 (m, 2 H, H-6a<sup>Cer</sup>, H-6b<sup>Cer</sup>), 1.89 (s, 3 H, Ac), 1.81 (s, 3 H, Ac), 1.71–1.66 (m, 2 H, NHC(=O)CH<sub>2</sub>), 1.38–1.08 (m, 70 H, 26 CH<sub>2</sub><sup>Cer</sup>, 2 <sup>t</sup>Bu), 0.89–0.85 (m, 6 H, 2 Me<sup>Cer</sup>), 0.60 (s, 3 H, Ac); <sup>13</sup>C NMR (125 MHz, CDCl<sub>3</sub>)  $\delta$  172.6, 170.5, 170.4, 170.3, 169.9, 169.9, 169.9, 166.2, 166.0, 165.8, 165.2, 165.1, 165.0, 165.0, 159.3, 159.0, 157.4, 157.1, 157.0, 156.5, 137.1, 133.6, 133.6, 133.4, 133.3, 133.3, 130.5, 130.1, 129.9, 129.8, 129.7, 129.7, 129.7, 129.6, 129.6, 129.6, 129.5, 129.1, 128.9, 128.8, 128.8, 128.7, 128.5, 128.5, 127.6, 126.8, 125.4, 125.3, 124.9, 117.1, 114.8, 113.9, 113.7, 101.5, 101.1, 100.6, 99.2, 98.4, 79.0, 78.6, 77.6, 75.3, 74.8, 74.7, 74.1, 73.5, 73.4, 73.3, 73.2, 72.5, 72.1, 71.5, 70.9, 70.7, 70.4, 70.3, 70.1, 70.1, 69.1, 68.5, 67.7, 67.5, 67.4, 66.3, 62.3, 61.8, 61.1, 60.9, 55.2, 50.4, 39.6, 36.4, 35.2, 35.0, 32.3, 31.9, 31.1, 30.0, 29.7, 29.7, 29.7, 29.6, 29.6, 29.5, 29.5, 29.4, 29.3, 29.3, 29.0, 25.6, 22.7, 22.0, 21.6, 20.8, 20.7, 20.7, 20.6, 20.5, 14.1; HRMS (ESI)  $m/z$ : found  $[\text{M}/2+\text{Na}]^+$  1511.1882, C<sub>161</sub>H<sub>208</sub>F<sub>3</sub>N<sub>3</sub>O<sub>46</sub> calcd for  $[\text{M}/2+\text{Na}]^+$  1511.1883.

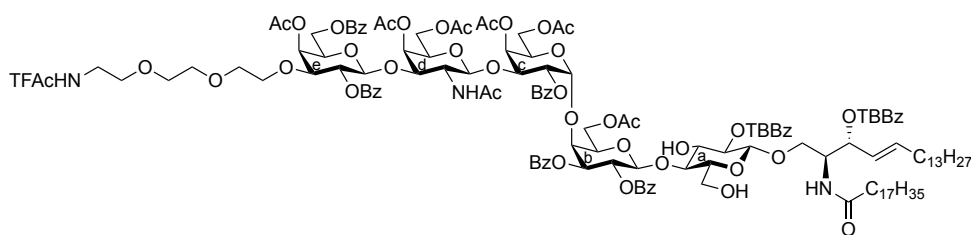

## Compound 19

To a solution of compound **18** (55.5 mg, 18.6  $\mu\text{mol}$ ) in CH<sub>2</sub>Cl<sub>2</sub> (1.2 mL) was added TFA (620  $\mu\text{L}$ , 8.10 mmol) at 0 °C. After stirring for 30 min at 0 °C as the progress of the reaction was monitored by TLC (toluene/acetone = 3/1, developed twice), the reaction mixture was neutralized with satd. aq. NaHCO<sub>3</sub> and diluted with CHCl<sub>3</sub>. The organic layer was washed with satd. aq. NaHCO<sub>3</sub> and brine, dried over Na<sub>2</sub>SO<sub>4</sub>, and concentrated. The residue was purified by silica gel column chromatography (toluene/acetone = 4/1) to give compound **19** (49.0 mg, 96%) as a white amorphous solid;  $[\alpha]_{\text{D}} +58.7^\circ$  (c 1.1, CHCl<sub>3</sub>); <sup>1</sup>H NMR (500 MHz, CDCl<sub>3</sub>)  $\delta$  8.05–7.03 (m, 34 H, 7 Ar, CF<sub>3</sub>C(=O)NH), 5.90 (near quin, 1 H,  $J_{5,6a} = J_{5,6b} = 6.5$  Hz,  $J_{4,5} = 15.5$  Hz, H-5<sup>Cer</sup>), 5.80 (d, 1 H,  $J_{2,\text{NH}} = 10.0$  Hz, NH-2<sup>Cer</sup>), 5.76 (dd, 1 H,  $J_{1,2} =$

8.0 Hz,  $J_{2,3} = 10.8$  Hz, H-2<sup>b</sup>), 5.59 (t, 1 H,  $J_{2,3} = J_{3,4} = 8.8$  Hz, H-3<sup>Cer</sup>), 5.54 (d, 1 H,  $J_{3,4} = 3.0$  Hz, H-4<sup>e</sup>), 5.50 (d, 1 H,  $J_{3,4} = 3.2$  Hz, H-4<sup>d</sup>), 5.48–5.41 (m, 3 H, H-2<sup>c</sup>, H-4<sup>c</sup>, H-4<sup>Cer</sup>), 5.25 (dd, 1 H,  $J_{3,4} = 3.0$  Hz, H-3<sup>b</sup>), 5.23 (dd, 1 H,  $J_{1,2} = 7.7$  Hz,  $J_{2,3} = 10.3$  Hz, H-2<sup>e</sup>), 5.17 (d, 1 H,  $J_{1,2} = 8.0$  Hz, H-1<sup>d</sup>), 5.15–5.11 (m, 2 H, H-2<sup>a</sup>, NH-2<sup>d</sup>), 5.00 (d, 1 H,  $J_{1,2} = 3.5$  Hz, H-1<sup>c</sup>), 4.89 (d, 1 H, H-1<sup>b</sup>), 4.76 (dd, 1 H,  $J_{2,3} = 11.0$  Hz, H-3<sup>d</sup>), 4.61 (d, 1 H,  $J_{1,2} = 7.5$  Hz, H-1<sup>e</sup>), 4.50–4.41 (m, 4 H, H-1<sup>a</sup>, H-5<sup>d</sup>, H-6a<sup>e</sup>, H-2<sup>Cer</sup>), 4.33–4.27 (m, 3 H, H-4<sup>b</sup>, H-3<sup>c</sup>, H-6b<sup>e</sup>), 4.20 (dd, 1 H,  $J_{5,6a} = 7.8$  Hz,  $J_{gem} = 10.3$  Hz, H-6a<sup>b</sup>), 4.14–4.11 (m, 2 H, H-6a<sup>c</sup>, OH-3<sup>a</sup>), 4.03–3.85 (m, 8 H, H-3<sup>a</sup>, H-4<sup>a</sup>, H-5<sup>b</sup>, H-6b<sup>b</sup>, H-5<sup>c</sup>, H-6b<sup>c</sup>, H-5<sup>e</sup>, H-1a<sup>Cer</sup>), 3.70 (m, 1 H, OCH<sub>2</sub>), 3.67–3.63 (m, 2 H, H-6a<sup>d</sup>, H-3<sup>e</sup>), 3.55 (dd, 1 H,  $J_{1b,2} = 3.5$  Hz,  $J_{gem} = 9.5$  Hz, H-1b<sup>Cer</sup>), 3.50–3.24 (m, 13 H, H-6a<sup>a</sup>, H-6b<sup>d</sup>, 9 OCH<sub>2</sub>, 2 NHCH<sub>2</sub>), 3.16 (br d, 1 H, H-5<sup>a</sup>), 3.04–2.97 (m, 2 H, H-6b<sup>a</sup>, H-2<sup>d</sup>), 2.90 (br s, 1 H, OH-6<sup>a</sup>), 2.16 (s, 3 H, Ac), 2.11 (s, 3 H, Ac), 2.09 (s, 3 H, Ac), 2.03 (s, 3 H, Ac), 2.00–1.96 (m, 4 H, H-6a<sup>Cer</sup>, H-6b<sup>Cer</sup>, NHC(=O)CH<sub>2</sub>), 1.84 (s, 3 H, Ac), 1.83 (s, 3 H, Ac), 1.49–1.22 (m, 70 H, 26 CH<sub>2</sub><sup>Cer</sup>, 2 <sup>t</sup>Bu), 0.89–0.86 (m, 6 H, 2 Me<sup>Cer</sup>), 0.65 (s, 3 H, Ac); <sup>13</sup>C NMR (125 MHz, CDCl<sub>3</sub>)  $\delta$  172.7, 170.9, 170.5, 170.4, 170.1, 170.0, 169.9, 169.0, 166.0, 165.9, 165.6, 165.5, 165.2, 165.0, 157.4, 157.1, 157.0, 157.0, 138.5, 133.7, 133.5, 133.4, 133.3, 129.8, 129.8, 129.7, 129.7, 129.6, 129.5, 128.9, 128.8, 128.7, 128.6, 128.5, 128.5, 128.5, 127.3, 125.5, 125.4, 124.9, 117.1, 114.8, 102.2, 101.6, 99.7, 98.8, 98.3, 80.9, 78.6, 77.6, 77.3, 74.6, 74.2, 74.0, 74.0, 73.5, 73.4, 72.7, 72.6, 71.6, 71.2, 70.8, 70.8, 70.4, 70.2, 70.2, 70.1, 69.3, 69.2, 69.1, 68.5, 67.6, 66.4, 66.2, 62.5, 62.0, 61.2, 61.0, 59.6, 55.5, 50.4, 39.6, 36.8, 35.2, 35.1, 32.3, 31.9, 31.2, 31.1, 29.7, 29.7, 29.6, 29.6, 29.5, 29.4, 29.4, 29.3, 29.3, 28.9, 25.6, 22.7, 22.0, 20.8, 20.8, 20.7, 20.6, 20.2, 14.1; HRMS (ESI)  $m/z$ : found  $[M/2+Na]^+$  1391.1305, C<sub>145</sub>H<sub>192</sub>F<sub>3</sub>N<sub>3</sub>O<sub>44</sub> calcd for  $[M/2+Na]^+$  1391.1308.

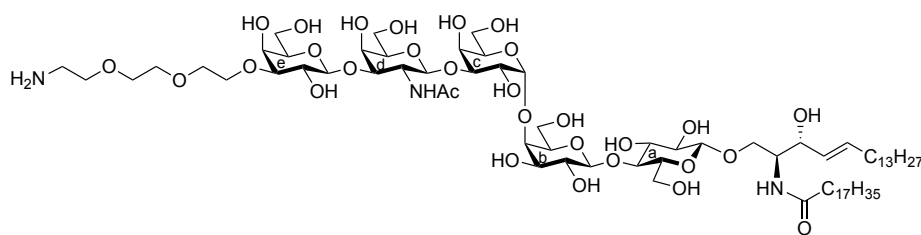

## Compound 20

To a solution of compound **19** (37.5 mg, 13.7  $\mu$ mol) in MeOH/THF = 1/1 (4.6 mL) was added 1 M NaOH aq. (274  $\mu$ L, 0.274 mmol). After stirring for 43 h at ambient temperature as the progress of the reaction was monitored by TLC (CHCl<sub>3</sub>/MeOH/H<sub>2</sub>O/AcOH = 5/4/1/0.2), the reaction mixture was neutralized with Muromac (H<sup>+</sup>), the resin was filtered through cotton, and washed with CHCl<sub>3</sub>/MeOH = 1/1. The combined filtrate and washings were concentrated and co-evaporated with EtOH. The residue was purified by silica gel column chromatography (CHCl<sub>3</sub>/MeOH/H<sub>2</sub>O/28% NH<sub>3</sub> aq. =

5/1/0.05/0 → 5/4/1/0 → 3/3/1/0.1) to give compound **20** (22.3 mg, quant.) as a white amorphous solid;  $[\alpha]_D +24.0^\circ$  (c 1.0, CHCl<sub>3</sub>/MeOH = 1/1); <sup>1</sup>H NMR (500 MHz, CDCl<sub>3</sub>/CD<sub>3</sub>OD = 1/1)  $\delta$  5.70 (near quin, 1 H,  $J_{5,6a} = J_{5,6b} = 6.5$  Hz,  $J_{4,5} = 15.4$  Hz, H-5<sup>Cer</sup>), 5.45 (dd, 1 H,  $J_{3,4} = 7.8$  Hz, H-4<sup>Cer</sup>), 4.99 (d, 1 H,  $J_{1,2} = 4.0$  Hz, H-1<sup>c</sup>), 4.75–4.29 (4 d, 4 H, H-1<sup>a</sup>, H-1<sup>b</sup>, H-1<sup>d</sup>, H-1<sup>e</sup>), 4.22–3.27 (m, 44 H, H-2<sup>a</sup>, H-3<sup>a</sup>, H-4<sup>a</sup>, H-5<sup>a</sup>, H-6a<sup>a</sup>, H-6b<sup>a</sup>, H-2<sup>b</sup>, H-3<sup>b</sup>, H-4<sup>b</sup>, H-5<sup>b</sup>, H-6a<sup>b</sup>, H-6b<sup>b</sup>, H-2<sup>c</sup>, H-3<sup>c</sup>, H-4<sup>c</sup>, H-5<sup>c</sup>, H-6a<sup>c</sup>, H-6b<sup>c</sup>, H-2<sup>d</sup>, H-3<sup>d</sup>, H-4<sup>d</sup>, H-5<sup>d</sup>, H-6a<sup>d</sup>, H-6b<sup>d</sup>, H-2<sup>e</sup>, H-3<sup>e</sup>, H-4<sup>e</sup>, H-5<sup>e</sup>, H-6a<sup>e</sup>, H-6b<sup>e</sup>, H-1a<sup>Cer</sup>, H-1b<sup>Cer</sup>, H-2<sup>Cer</sup>, H-3<sup>Cer</sup>, 5 OCH<sub>2</sub>), 2.92–2.90 (m, 2 H, NH<sub>2</sub>CH<sub>2</sub>), 2.19–2.16 (m, 2 H, NHC(=O)CH<sub>2</sub>), 2.05–2.02 (m, 2 H, H-6a<sup>Cer</sup>, H-6b<sup>Cer</sup>), 1.99 (s, 3 H, Ac), 1.60–1.58 (m, 2 H, NHC(=O)CH<sub>2</sub>CH<sub>2</sub>), 1.38–1.27 (m, 50 H, 25 CH<sub>2</sub><sup>Cer</sup>), 0.90–0.88 (m, 6 H, 2 Me<sup>Cer</sup>); <sup>13</sup>C NMR (125 MHz, CDCl<sub>3</sub>/CD<sub>3</sub>OD = 1/1)  $\delta$  175.2, 174.4, 172.6, 134.9, 130.1, 129.4, 128.7, 125.7, 105.4, 104.6, 103.6, 103.2, 102.3, 82.6, 80.5, 80.5, 80.3, 80.2, 78.7, 75.7, 75.6, 75.4, 75.2, 74.0, 74.0, 72.5, 72.2, 71.7, 71.5, 71.0, 70.8, 70.3, 69.7, 69.3, 69.2, 68.8, 68.4, 66.3, 62.3, 62.0, 61.2, 61.0, 53.8, 52.8, 51.9, 41.1, 39.5, 37.0, 32.9, 32.4, 32.1, 30.9, 30.2, 30.2, 30.2, 30.1, 30.1, 30.0, 29.9, 29.9, 29.9, 29.8, 26.5, 23.2, 23.1, 21.5, 21.0, 14.3, 14.2; HRMS (ESI)  $m/z$ : found  $[M+H]^+$  1548.9364, C<sub>74</sub>H<sub>137</sub>N<sub>3</sub>O<sub>30</sub> calcd for  $[M+H]^+$  1548.9360.

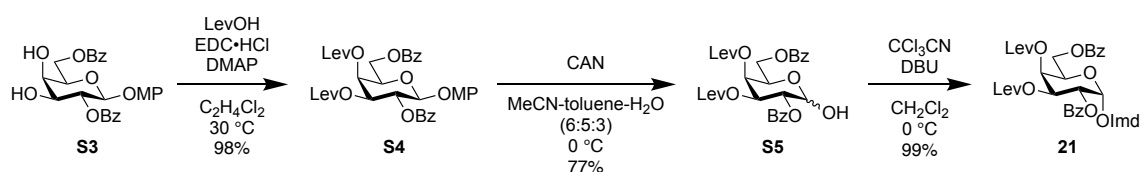

**Supporting Scheme 2.** Synthesis of Gal donor **21**.

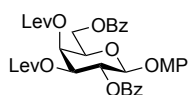

### Compound **S4**

To a solution of compound **S3**<sup>S04</sup> (1.00 g, 2.02 mmol) in C<sub>2</sub>H<sub>4</sub>Cl<sub>2</sub> (40 mL) were added DMAP (247 mg, 2.02 mmol), LevOH (622  $\mu$ L, 6.07 mmol) and EDC·HCl (1.16 g, 6.07 mmol). After stirring for 15 h at 30 °C as the progress of the reaction was monitored by TLC (CHCl<sub>3</sub>/MeOH = 30/1), the reaction mixture was diluted with CHCl<sub>3</sub>. The organic layer was washed with H<sub>2</sub>O and brine, dried over Na<sub>2</sub>SO<sub>4</sub>, and concentrated. The residue was purified by silica gel column chromatography (*n*-hexane/EtOAc = 1/1 → 2/3) to give compound **S4** (1.37 g, 98%) as a white foam;  $[\alpha]_D +20.0^\circ$  (c 1.0, CHCl<sub>3</sub>); <sup>1</sup>H NMR (500 MHz, CDCl<sub>3</sub>)  $\delta$  8.05–6.64 (m, 14 H, 3 Ar), 5.74 (dd, 1 H,  $J_{1,2} = 8.0$  Hz,  $J_{3,4} = 10.5$  Hz, H-2), 5.62 (near d, 1 H,  $J_{3,4} = 3.4$  Hz, H-4), 5.27 (dd, 1 H, H-3), 5.06 (d, 1 H, H-1), 4.57 (dd, 1 H,  $J_{5,6a} = 8.0$  Hz,  $J_{gem} = 11.5$  Hz, H-6a), 4.44 (dd, 1 H,  $J_{5,6b} = 5.5$  Hz, H-6b), 4.22 (near t, 1 H, H-5), 2.85–2.81 (m, 2 H, C(=O)CH<sub>2</sub>),

2.79–2.71 (m, 2 H, C(=O)CH<sub>2</sub>), 2.69–2.58 (m, 2 H, C(=O)CH<sub>2</sub>), 2.52–2.41 (m, 2 H, C(=O)CH<sub>2</sub>), 2.21 (s, 3 H, CH<sub>2</sub>C(=O)Me), 2.03 (s, 3 H, CH<sub>2</sub>C(=O)Me); <sup>13</sup>C NMR (125 MHz, CDCl<sub>3</sub>) δ 206.0, 172.0, 171.9, 166.0, 165.2, 155.7, 151.1, 133.4, 133.3, 129.9, 129.8, 129.5, 129.3, 128.5, 128.5, 118.9, 114.4, 101.2, 71.4, 71.2, 69.3, 67.4, 62.0, 55.6, 37.9, 37.7, 29.8, 29.5, 27.9, 27.9; HRMS (ESI) *m/z*: found [M+Na]<sup>+</sup> 713.2205, C<sub>37</sub>H<sub>38</sub>O<sub>13</sub> calcd for [M+Na]<sup>+</sup> 713.2205.

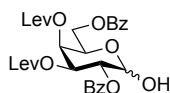

### Compound S5

To a solution of compound **S4** (127 mg, 0.184 mmol) in MeCN/toluene/H<sub>2</sub>O = 6/5/3 (3.7 mL) was added cerium (IV) ammonium nitrate (1.01 g, 1.84 mmol) at 0 °C. After stirring for 6 h at 0 °C as the progress of the reaction was monitored by TLC (toluene/acetone = 4/1), the reaction mixture was diluted with EtOAc. The organic layer was washed with H<sub>2</sub>O, satd. aq. NaHCO<sub>3</sub> and brine, dried over Na<sub>2</sub>SO<sub>4</sub>, and concentrated. The residue was purified by silica gel column chromatography (toluene/acetone = 20/1 → 10/1 → 8/1 → 3/1) to give compound **S5** (83.5 mg, 77%, α:β = 1:0.3) as a white foam; <sup>1</sup>H NMR (500 MHz, CDCl<sub>3</sub>) δ 8.06–7.42 (m, 20 H, 2 Phα,β), 5.71 (t, 1 H, *J*<sub>1,2</sub> = *J*<sub>1,OH</sub> = 2.8 Hz, H-1α), 5.68–5.64 (m, 2 H, H-3α, H-4α), 5.59 (br d, 1 H, H-4β), 5.40 (dd, 1 H, *J*<sub>2,3</sub> = 10.5 Hz, H-2α), 5.33–5.32 (m, 2 H, H-2β, H-3β), 4.87 (m, 1 H, H-1β), 4.67 (t, 1 H, *J*<sub>5,6a</sub> = *J*<sub>5,6b</sub> = 6.8 Hz, H-5α), 4.54 (dd, 1 H, *J*<sub>5,6a</sub> = 6.8 Hz, *J*<sub>gem</sub> = 11.4 Hz, H-6aβ), 4.48 (dd, 1 H, *J*<sub>gem</sub> = 11.5 Hz, H-6aα), 4.38 (dd, 1 H, *J*<sub>5,6b</sub> = 6.5 Hz, H-6bβ), 4.32 (dd, 1 H, H-6bα), 4.16 (dd, 1 H, H-5β), 3.96 (d, 1 H, *J*<sub>1,OH</sub> = 8.5 Hz, OH-1β), 3.03 (d, 1 H, OH-1α), 2.80–2.40 (m, 16 H, 2 C(=O)CH<sub>2</sub>α,β), 2.18 (s, 3 H, CH<sub>2</sub>C(=O)Meβ), 2.17 (s, 3 H, CH<sub>2</sub>C(=O)Meα), 2.05 (s, 3 H, CH<sub>2</sub>C(=O)Meα), 2.03 (s, 3 H, CH<sub>2</sub>C(=O)Meβ); HRMS (ESI) *m/z*: found [M+Na]<sup>+</sup> 607.1786, C<sub>30</sub>H<sub>32</sub>O<sub>12</sub> calcd for [M+Na]<sup>+</sup> 607.1786.

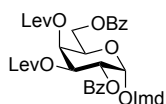

### Compound 21

To a solution of compound **S5** (640 mg, 1.09 mmol) in CH<sub>2</sub>Cl<sub>2</sub> (22 mL) were added CCl<sub>3</sub>CN (2.20 mL, 21.9 mmol) and DBU (32.7 μL, 0.219 mmol) at 0 °C. After stirring for 3.5 h at 0 °C as the progress of the reaction was monitored by TLC (CHCl<sub>3</sub>/MeOH = 30/1), the reaction mixture was concentrated. The residue was purified by silica gel column chromatography (toluene/acetone = 12/1) to give compound **21** (785 mg, 99%) as a colorless syrup; [α]<sub>D</sub> +89.7° (c 1.0, CHCl<sub>3</sub>); <sup>1</sup>H NMR (500 MHz, CDCl<sub>3</sub>) δ 8.58 (s, 1 H, C(=NH)CCl<sub>3</sub>), 8.02–7.43 (m, 10 H, 2 Ph), 6.76 (d, 1 H, *J*<sub>1,2</sub> = 3.0 Hz, H-1), 5.74 (m, 1 H, H-

4), 5.69–5.64 (m, 2 H, H-2, H-3), 4.65 (near t, 1 H, H-5), 4.48 (dd, 1 H,  $J_{5,6a} = 7.0$  Hz,  $J_{gem} = 11.5$  Hz, H-6a), 4.37 (dd, 1 H,  $J_{5,6b} = 6.0$  Hz, H-6b), 2.85–2.60 (m, 6 H, 3 C(=O)CH<sub>2</sub>), 2.56–2.43 (m, 2 H, C(=O)CH<sub>2</sub>), 2.18 (s, 3 H, CH<sub>2</sub>C(=O)Me), 2.04 (s, 3 H, CH<sub>2</sub>C(=O)Me); <sup>13</sup>C NMR (125 MHz, CDCl<sub>3</sub>) δ 206.0, 205.9, 171.9, 171.9, 165.9, 165.6, 160.5, 133.6, 133.2, 129.9, 129.7, 129.5, 128.8, 128.5, 93.6, 90.7, 69.4, 67.8, 67.8, 67.4, 62.0, 37.8, 37.7, 29.7, 29.5, 27.8, 27.8; HRMS (ESI)  $m/z$ : found [M+Na]<sup>+</sup> 750.0882, C<sub>32</sub>H<sub>32</sub>Cl<sub>3</sub>NO<sub>12</sub> calcd for [M+Na]<sup>+</sup> 750.0882.

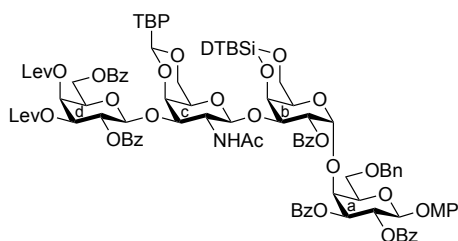

## Compound 22

To a solution of donor **21** (291 mg, 0.399 mmol) and acceptor **10** (446 mg, 0.333 mmol) in CH<sub>2</sub>Cl<sub>2</sub> (7.3 mL) was added 4 Å molecular sieves (AW-300, 1.00 g). After stirring for 1 h at ambient temperature, TMSOTf (6.0 μL, 33.3 μmol) was added at 0 °C. After stirring for 9 h at 0 °C as the progress of the reaction was monitored by TLC (toluene/acetone = 5/1), the reaction mixture was neutralized with satd. aq. NaHCO<sub>3</sub> and filtered through a pad of Celite. The pad was washed with CHCl<sub>3</sub>. The combined filtrate and washings were diluted with CHCl<sub>3</sub> and washed with brine. The organic layer was dried over Na<sub>2</sub>SO<sub>4</sub> and concentrated. The residue was purified by silica gel column chromatography (toluene/acetone = 8/1 → 7/1) to give compound **22** (551 mg, 87%) as a white amorphous solid; [α]<sub>D</sub> +62.4° (c 0.9, CHCl<sub>3</sub>); <sup>1</sup>H NMR (500 MHz, CDCl<sub>3</sub>) δ 8.08–6.72 (m, 38 H, 8 Ar), 5.93 (dd, 1 H,  $J_{1,2} = 7.7$  Hz,  $J_{2,3} = 10.9$  Hz, H-2<sup>a</sup>), 5.56 (dd, 1 H,  $J_{1,2} = 4.0$  Hz,  $J_{2,3} = 10.5$  Hz, H-2<sup>b</sup>), 5.40 (d, 1 H,  $J_{3,4} = 3.3$  Hz, H-4<sup>d</sup>), 5.43 (dd, 1 H,  $J_{1,2} = 8.0$  Hz,  $J_{2,3} = 10.3$  Hz, H-2<sup>d</sup>), 5.41 (s, 1 H, ArCH<), 5.31 (dd, 1 H,  $J_{3,4} = 2.5$  Hz, H-3<sup>a</sup>), 5.25–5.23 (m, 2 H, H-1<sup>c</sup>, NH-2<sup>c</sup>), 5.17 (d, 1 H, H-1<sup>b</sup>), 5.14 (dd, 1 H, H-3<sup>d</sup>), 5.09 (d, 1 H, H-1<sup>a</sup>), 4.87 (dd, 1 H,  $J_{2,3} = 11.0$  Hz,  $J_{3,4} = 3.3$  Hz, H-3<sup>c</sup>), 4.78 (d, 1 H, H-1<sup>d</sup>), 4.70 (d, 1 H,  $J_{3,4} = 2.5$  Hz, H-4<sup>b</sup>), 4.66 (dd, 1 H,  $J_{5,6a} = 7.5$  Hz,  $J_{gem} = 11.3$  Hz, H-6a<sup>d</sup>), 4.36 (d, 1 H, H-4<sup>a</sup>), 4.27 (d, 1 H, H-4<sup>c</sup>), 4.25–4.21 (m, 2 H, H-3<sup>b</sup>, H-6b<sup>d</sup>), 4.17 (d, 1 H,  $J_{gem} = 11.5$  Hz, H-6a<sup>c</sup>), 4.11 (dd, 1 H,  $J_{5,6b} = 5.8$  Hz, H-5<sup>d</sup>), 4.07 (s, 3 H, H-5<sup>b</sup>, PhCH<sub>2</sub>), 3.89 (t, 1 H,  $J_{5,6a} = J_{5,6b} = 6.5$  Hz, H-5<sup>a</sup>), 3.74 (s, 3 H, OMe), 3.60 (d, 1 H, H-6b<sup>c</sup>), 3.54–3.45 (m, 4 H, H-6a<sup>a</sup>, H-6b<sup>a</sup>, H-6a<sup>b</sup>, H-6b<sup>b</sup>), 3.37 (s, 1 H, H-5<sup>c</sup>), 3.27 (m, 1 H, H-2<sup>c</sup>), 2.75–2.72 (m, 4 H, 2 C(=O)CH<sub>2</sub>), 2.56–2.52 (m, 2 H, C(=O)CH<sub>2</sub>), 2.38–2.35 (m, 2 H, C(=O)CH<sub>2</sub>), 2.11 (s, 3 H, CH<sub>2</sub>C(=O)Me), 1.95 (s, 3 H, CH<sub>2</sub>C(=O)Me), 1.33 (s, 9 H, <sup>t</sup>Bu), 1.00 (s, 9 H, <sup>t</sup>Bu), 0.91 (s, 9 H, <sup>t</sup>Bu), 0.62 (s, 3 H, Ac); <sup>13</sup>C NMR (125 MHz, CDCl<sub>3</sub>) δ 206.2, 205.9, 171.8, 171.7, 170.9, 166.0, 165.9, 165.5, 164.8, 155.6, 151.6, 151.3, 137.5,

135.6, 133.6, 133.5, 133.4, 133.3, 130.3, 129.8, 129.7, 129.6, 129.6, 129.4, 129.4, 129.4, 129.0, 128.9, 128.7, 128.5, 128.4, 128.3, 128.2, 127.7, 127.7, 126.4, 125.3, 124.9, 118.9, 114.4, 102.4, 101.1, 100.8, 99.7, 98.0, 75.9, 75.1, 74.1, 73.9, 73.5, 73.2, 71.1, 71.0, 69.6, 69.4, 69.3, 69.0, 68.1, 68.0, 67.5, 66.6, 66.2, 62.4, 55.6, 54.8, 37.8, 37.7, 34.6, 31.4, 29.7, 29.4, 28.0, 27.8, 27.5, 27.4, 23.3, 22.3, 20.6; HRMS (ESI)  $m/z$ : found  $[M+Na]^+$  1926.7271,  $C_{104}H_{117}NO_{31}Si$  calcd for  $[M+Na]^+$  1926.7271.

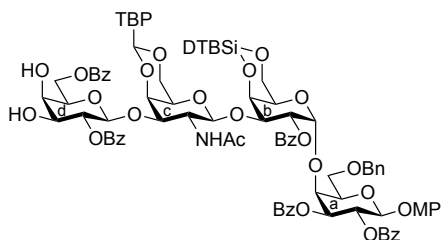

### Compound 23

To a solution of compound **22** (118 mg, 61.9  $\mu$ mol) in MeOH/THF = 1/5 (3.1 mL) was added  $N_2H_4 \cdot AcOH$  (57.0 mg, 0.619 mmol). After stirring for 1 h at ambient temperature as the progress of the reaction was monitored by TLC (toluene/acetone = 2/1), the reaction mixture was diluted with EtOAc. The organic layer was washed with satd. aq.  $NaHCO_3$  and brine, dried over  $Na_2SO_4$ , and concentrated. The residue was purified by silica gel column chromatography (toluene/acetone = 11/3) to give compound **23** (101 mg, 95%) as a white amorphous solid;  $[\alpha]_D^{+25} +57.5^\circ$  (c 1.0,  $CHCl_3$ );  $^1H$  NMR (500 MHz,  $CD_3NO_2$ , 70  $^\circ C$ )  $\delta$  8.14–6.82 (m, 38 H, 8 Ar), 5.96 (dd, 1 H,  $J_{1,2} = 8.0$  Hz,  $J_{2,3} = 10.7$  Hz, H-2<sup>a</sup>), 5.72 (dd, 1 H,  $J_{1,2} = 3.5$  Hz,  $J_{2,3} = 10.5$  Hz, H-2<sup>b</sup>), 5.47 (dd, 1 H,  $J_{3,4} = 2.8$  Hz, H-3<sup>a</sup>), 5.43 (s, 1 H, ArCH<), 5.38–5.36 (m, 2 H, H-1<sup>a</sup>, NH-2<sup>c</sup>), 5.27 (d, 1 H, H-1<sup>b</sup>), 5.14 (near t, 1 H, H-2<sup>d</sup>), 5.04 (br d, 1 H, H-1<sup>c</sup>), 4.91 (br s, 1 H, H-4<sup>c</sup>), 4.81–4.76 (m, 2 H, H-1<sup>d</sup>, H-6a<sup>d</sup>), 4.54–4.51 (m, 2 H, H-4<sup>a</sup>, H-6b<sup>d</sup>), 4.42 (d, 1 H,  $J_{3,4} = 2.5$  Hz, H-4<sup>b</sup>), 4.36–4.09 (m, 9 H, H-5<sup>a</sup>, H-3<sup>b</sup>, H-5<sup>b</sup>, H-3<sup>c</sup>, H-6a<sup>c</sup>, H-4<sup>d</sup>, H-5<sup>d</sup>,  $PhCH_2$ ), 3.94 (m, 1 H, H-3<sup>d</sup>), 3.77 (s, 3 H, OMe), 3.72–3.59 (m, 4 H, H-6a<sup>a</sup>, H-6b<sup>a</sup>, H-2<sup>c</sup>, H-6b<sup>c</sup>), 3.53 (d, 1 H,  $J_{gem} = 12.8$  Hz, H-6a<sup>b</sup>), 3.45 (d, 1 H, H-6b<sup>b</sup>), 3.37 (s, 1 H, H-5<sup>c</sup>), 3.06 (br s, 1 H, OH-3<sup>d</sup>, OH-4<sup>d</sup>), 1.32 (s, 9 H, <sup>t</sup>Bu), 1.04 (s, 9 H, <sup>t</sup>Bu), 1.02 (s, 9 H, <sup>t</sup>Bu), 0.84 (br s, 3 H, Ac);  $^{13}C$  NMR (125 MHz,  $CD_3NO_2$ , 70  $^\circ C$ )  $\delta$  167.9, 167.4, 167.3, 167.2, 157.5, 153.8, 152.7, 139.8, 137.4, 135.1, 134.9, 134.7, 134.6, 131.9, 131.6, 131.3, 131.1, 131.0, 130.9, 130.8, 130.1, 129.9, 129.8, 129.7, 129.1, 127.8, 126.4, 120.3, 116.2, 103.9, 103.3, 102.5, 102.4, 99.4, 79.4, 79.0, 77.1, 75.5, 75.4, 75.1, 75.0, 74.6, 74.4, 74.3, 73.7, 71.8, 70.9, 70.5, 70.2, 69.9, 69.7, 68.1, 68.0, 65.4, 56.6, 54.2, 35.6, 31.8, 28.4, 28.2, 24.3, 23.2, 21.6; HRMS (ESI)  $m/z$ : found  $[M+Na]^+$  1730.6535,  $C_{94}H_{105}NO_{27}Si$  calcd for  $[M+Na]^+$  1730.6535.





2.84 (dd, 1 H,  $J_{\text{gem}} = 12.5$  Hz,  $J_{3\text{eq},4} = 5.0$  Hz, H-3eq), 2.46 (s, 3 H, ArMe), 1.87 (dd, 1 H,  $J_{3\text{ax},4} = 11.5$  Hz, H-3ax), 1.42 (s, 9 H,  $t\text{Bu}$ );  $^{13}\text{C}$  NMR (125 MHz, acetone- $d_6$ )  $\delta$  170.5, 159.0, 145.6, 137.5, 134.5, 130.9, 130.8, 129.8, 129.7, 128.7, 87.4, 80.6, 77.4, 73.0, 70.1, 69.5, 68.3, 54.4, 53.3, 41.7, 28.5, 21.5; HRMS (ESI)  $m/z$ : found  $[\text{M}+\text{Na}]^+$  650.1695,  $\text{C}_{28}\text{H}_{37}\text{NO}_{11}\text{S}_2$  calcd for  $[\text{M}+\text{Na}]^+$  650.1695.

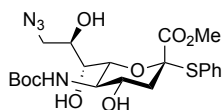

### Compound S7

To a solution of compound **S6** (4.21 g, 6.71 mmol) in DMF (134 mL) were added Drierite (4.21 g), 18-crown-6 (1.05 g, 3.97 mmol) and  $\text{NaN}_3$  (3.49 g, 53.7 mmol). After stirring for 2.5 h at 80 °C as the progress of the reaction was monitored by TLC ( $n$ -hexane/acetone = 3/2), the reaction mixture was filtered through a pad of Celite. The pad was washed with  $\text{CHCl}_3$ . The combined filtrate and washings were co-evaporated with toluene. The residue was purified by silica gel column chromatography ( $n$ -hexane/acetone = 2/1) to give compound **S7** (3.07 g, 92%) as a white foam;  $[\alpha]_{\text{D}} +56.3^\circ$  (c 1.0,  $\text{CHCl}_3$ );  $^1\text{H}$  NMR (500 MHz, acetone- $d_6$ )  $\delta$  7.57–7.37 (m, 5 H, Ph), 6.19 (d, 1 H,  $J_{5,\text{NH}} = 8.5$  Hz, NH-5), 4.57 (d, 1 H,  $J_{4,\text{OH}} = 5.5$  Hz, OH-4), 4.54 (d, 1 H,  $J_{7,\text{OH}} = 4.0$  Hz, OH-7), 3.98 (m, 1 H, H-8), 3.76 (m, 1 H, H-4), 3.68 (s, 3 H, C(=O)OMe), 3.56–3.47 (m, 4 H, H-5, H-7, H-9a, OH-8), 3.32 (dd, 1 H,  $J_{6,7} = 1.5$  Hz,  $J_{5,6} = 10.8$  Hz, H-6), 3.29 (dd, 1 H,  $J_{8,9\text{b}} = 6.5$  Hz,  $J_{\text{gem}} = 13.0$  Hz, H-9b), 2.86 (dd, 1 H,  $J_{3\text{eq},4} = 4.8$  Hz,  $J_{\text{gem}} = 12.8$  Hz, H-3eq), 1.90 (dd, 1 H,  $J_{3\text{ax},4} = 11.8$  Hz, H-3ax), 1.42 (s, 9 H,  $t\text{Bu}$ );  $^{13}\text{C}$  NMR (125 MHz, acetone- $d_6$ )  $\delta$  170.7, 159.0, 137.5, 131.0, 129.8, 129.7, 87.3, 80.6, 77.6, 72.0, 70.8, 68.3, 54.5, 54.4, 53.4, 41.7, 28.5; HRMS (ESI)  $m/z$ : found  $[\text{M}+\text{Na}]^+$  521.1677,  $\text{C}_{21}\text{H}_{30}\text{N}_4\text{O}_8\text{S}$  calcd for  $[\text{M}+\text{Na}]^+$  521.1677.

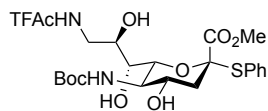

### Compound 25

To a solution of compound **S7** (3.79 g, 5.60 mmol) in MeOH (280 mL) were added  $\text{Et}_3\text{N}$  (7.76 mL, 56.0 mmol), TFAcOMe (2.78 mL, 28.0 mmol) and  $\text{Pd}(\text{OH})_2\text{-C}$  (393 mg, 20% on carbon). After stirring for 1.5 h at ambient temperature as the progress of the reaction was monitored by TLC ( $n$ -hexane/acetone = 3/2), the reaction mixture was filtered through a pad of Celite, the pad was washed with  $\text{CHCl}_3$ , and the combined filtrate and washings were concentrated. The residue was purified by silica gel column chromatography ( $n$ -hexane/acetone = 2/1) to give compound **25** (4.12 g, 95%) as a white foam;  $[\alpha]_{\text{D}}$

+70.8° (c 1.0, CHCl<sub>3</sub>); <sup>1</sup>H NMR (500 MHz, acetone-*d*<sub>6</sub>) δ 8.07 (br s, 1 H, CF<sub>3</sub>C(=O)NH), 7.56–7.36 (m, 5 H, Ph), 6.18 (d, 1 H, *J*<sub>5,NH</sub> = 8.0 Hz, NH-5), 4.63 (d, 1 H, *J*<sub>7,OH</sub> = 4.5 Hz, OH-7), 4.57 (d, 1 H, *J*<sub>4,OH</sub> = 5.5 Hz, OH-4), 3.93 (m, 1 H, H-8), 3.79–3.67 (m, 5 H, H-4, H-9a, C(=O)OMe), 3.53 (near q, 1 H, H-5), 3.46 (d, 1 H, *J*<sub>8,OH</sub> = 3.0 Hz, OH-8), 3.41–3.35 (m, 2 H, H-7, H-9b), 3.31 (dd, 1 H, *J*<sub>6,7</sub> = 1.5 Hz, *J*<sub>5,6</sub> = 10.5 Hz, H-6), 2.85 (dd, 1 H, *J*<sub>3eq,4</sub> = 4.5 Hz, *J*<sub>gem</sub> = 12.5 Hz, H-3eq), 1.90 (dd, 1 H, *J*<sub>3ax,4</sub> = 11.5 Hz, H-3ax), 1.41 (s, 9 H, <sup>*t*</sup>Bu); <sup>13</sup>C NMR (125 MHz, acetone-*d*<sub>6</sub>) δ 170.7, 158.9, 157.6, 157.3, 137.6, 130.9, 129.8, 129.6, 118.4, 116.1, 87.2, 80.5, 77.6, 72.1, 70.1, 68.3, 54.4, 53.3, 43.9, 41.7, 28.5; HRMS (ESI) *m/z*: found [M+Na]<sup>+</sup> 591.1591, C<sub>23</sub>H<sub>31</sub>F<sub>3</sub>N<sub>2</sub>O<sub>9</sub>S calcd for [M+Na]<sup>+</sup> 591.1595.

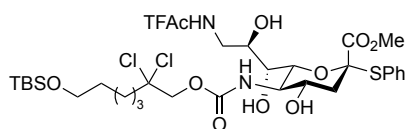

## Compound 26

To a solution of compound **25** (3.12 g, 5.49 mmol) in CH<sub>2</sub>Cl<sub>2</sub> (220 mL) were added anisole (1.19 mL, 11.0 mmol) and TFA (55 mL) at 0 °C. After stirring for 1 h at 0 °C as the progress of the reaction was monitored by TLC (CHCl<sub>3</sub>/MeOH = 10/1), the reaction mixture was concentrated and the resulting amine was dried for 2 h. To a solution of compound **S8** (6.94 g, 22.0 mmol) in MeCN (110 mL) were added Et<sub>3</sub>N (7.65 mL, 54.9 mmol) and DSC (5.75 g, 22.0 mmol). After stirring for 2 h at room temperature as the progress of the reaction was monitored by TLC (*n*-hexane/EtOAc = 5/1), the reaction mixture was added to a solution of amine in MeOH (110 mL) at 0 °C. After stirring for 5 h at ambient temperature as the progress of the reaction was monitored by TLC (CHCl<sub>3</sub>/MeOH = 10/1), the reaction mixture was concentrated. The residue was purified by silica gel column chromatography (*n*-hexane/acetone = 4/1 → 3/1) to give compound **26** (3.75 g, 84%) as a white foam; [α]<sub>D</sub> +57.8° (c 1.0, CHCl<sub>3</sub>); <sup>1</sup>H NMR (500 MHz, acetone-*d*<sub>6</sub>) δ 8.14 (br s, 1 H, CF<sub>3</sub>C(=O)NH), 7.57–7.36 (m, 5 H, Ph), 6.74 (d, 1 H, *J*<sub>5,NH</sub> = 8.5 Hz, NH-5), 4.64–4.61 (m, 2 H, NHC(=O)OCH<sub>2</sub>, OH-4), 4.43 (d, 1 H, *J*<sub>gem</sub> = 12.0 Hz, NHC(=O)OCH<sub>2</sub>), 4.25 (d, 1 H, *J*<sub>7,OH</sub> = 5.5 Hz, OH-7), 3.92 (m, 1 H, H-8), 3.84–3.74 (m, 2 H, H-4, H-9a), 3.67–3.63 (m, 6 H, H-5, 2 CH<sub>2</sub>OSi(<sup>*t*</sup>Bu)Me<sub>2</sub>, C(=O)OMe), 3.47–3.43 (m, 3 H, H-6, H-7, OH-8), 3.25 (m, 1 H, H-9b), 2.85 (m, 1 H, H-3eq), 2.23 (m, 2 H, CCl<sub>2</sub>CH<sub>2</sub>CH<sub>2</sub>), 1.92 (dd, 1 H, *J*<sub>gem</sub> = 12.5 Hz, *J*<sub>3ax,4</sub> = 11.5 Hz, H-3ax), 1.68 (m, 2 H, CCl<sub>2</sub>CH<sub>2</sub>CH<sub>2</sub>), 1.55 (m, 2 H, CH<sub>2</sub>), 1.43 (m, 2 H, CH<sub>2</sub>), 0.89 (s, 9 H, OSi(<sup>*t*</sup>Bu)Me<sub>2</sub>), 0.05 (s, 6 H, OSi(<sup>*t*</sup>Bu)Me<sub>2</sub>); <sup>13</sup>C NMR (125 MHz, acetone-*d*<sub>6</sub>) δ 170.6, 157.8, 157.7, 157.4, 137.6, 130.9, 129.7, 129.6, 118.4, 116.1, 92.0, 87.2, 77.1, 72.3, 72.2, 70.3, 68.4, 63.4, 54.9, 53.3, 44.8, 44.1, 41.7, 33.3, 26.3, 26.0, 25.3, 18.8, –5.2; HRMS (ESI) *m/z*: found [M+Na]<sup>+</sup> 831.2099, C<sub>32</sub>H<sub>49</sub>Cl<sub>2</sub>F<sub>3</sub>N<sub>2</sub>O<sub>10</sub>SSi calcd for [M+Na]<sup>+</sup> 831.2099.

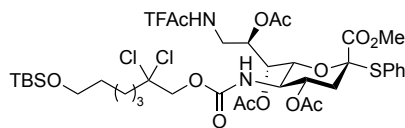

### Compound S9

To a solution of compound **26** (2.10 g, 2.59 mmol) in pyridine (26 mL) were added Ac<sub>2</sub>O (985  $\mu$ L, 10.4 mmol) and DMAP (31.6 mg, 0.259 mmol) at 0 °C. After stirring for 4 h at ambient temperature as the progress of the reaction was monitored by TLC (*n*-hexane/acetone = 2/1), Ac<sub>2</sub>O (491  $\mu$ L, 5.18 mmol) was added to complete the reaction. After stirring for another 2 h at ambient temperature, the reaction was quenched with MeOH at 0 °C. The reaction mixture was co-evaporated with toluene and diluted with CHCl<sub>3</sub>. The organic layer was washed with 2 M HCl, H<sub>2</sub>O, satd. aq. NaHCO<sub>3</sub> and brine, dried over Na<sub>2</sub>SO<sub>4</sub>, and concentrated. The residue was purified by silica gel column chromatography (*n*-hexane/acetone = 5/1) to give compound **S9** (2.22 g, 92%) as a white foam; [ $\alpha$ ]<sub>D</sub> +16.3° (c 1.0, CHCl<sub>3</sub>); <sup>1</sup>H NMR (500 MHz, CDCl<sub>3</sub>)  $\delta$  7.49–7.29 (m, 6 H, Ph, CF<sub>3</sub>C(=O)NH), 5.14 (dt, 1 H, *J*<sub>8,9a</sub> = *J*<sub>8,9b</sub> = 2.6 Hz, *J*<sub>7,8</sub> = 9.5 Hz, H-8), 5.09 (dd, 1 H, *J*<sub>6,7</sub> = 1.5 Hz, H-7), 4.82 (td, 1 H, *J*<sub>3eq,4</sub> = 4.5 Hz, *J*<sub>3ax,4</sub> = *J*<sub>4,5</sub> = 11.0 Hz, H-4), 4.70 (d, 1 H, *J*<sub>5,NH</sub> = 10.0 Hz, NH-5), 4.54 (d, 1 H, *J*<sub>gem</sub> = 12.0 Hz, NHC(=O)OCH<sub>2</sub>), 4.30 (d, 1 H, NHC(=O)OCH<sub>2</sub>), 4.27 (ddd, 1 H, *J*<sub>9a,NH</sub> = 8.8 Hz, *J*<sub>gem</sub> = 14.9 Hz, H-9a), 3.87 (dd, 1 H, *J*<sub>5,6</sub> = 10.5 Hz, H-6), 3.79 (near q, 1 H, H-5), 3.62 (t, 2 H, CH<sub>2</sub>OSi(*t*Bu)Me<sub>2</sub>), 3.54 (s, 3 H, C(=O)OMe), 2.95 (dt, 1 H, *J*<sub>9b,NH</sub> = 3.3 Hz, H-9b), 2.88 (dd, 1 H, *J*<sub>gem</sub> = 13.0 Hz, H-3eq), 2.25 (s, 3 H, Ac), 2.12 (m, 2 H, CCl<sub>2</sub>CH<sub>2</sub>CH<sub>2</sub>), 2.05–2.00 (m, 4 H, H-3ax, Ac), 1.98 (s, 3 H, Ac), 1.66 (m, 2 H, CCl<sub>2</sub>CH<sub>2</sub>CH<sub>2</sub>), 1.56 (m, 2 H, CH<sub>2</sub>), 1.40 (m, 2 H, CH<sub>2</sub>), 0.89 (s, 9 H, OSi(*t*Bu)Me<sub>2</sub>), 0.05 (s, 6 H, Si(*t*Bu)Me<sub>2</sub>); <sup>13</sup>C NMR (125 MHz, CDCl<sub>3</sub>)  $\delta$  172.2, 170.7, 169.7, 167.5, 158.0, 157.7, 154.9, 136.1, 130.0, 129.0, 129.0, 128.5, 128.2, 125.3, 117.0, 114.8, 90.0, 87.5, 74.1, 71.8, 69.3, 68.5, 67.9, 62.9, 52.8, 51.5, 44.1, 38.4, 38.3, 32.5, 26.0, 25.3, 24.5, 21.1, 20.9, 20.7, 18.4, –5.3; HRMS (ESI) *m/z*: found [M+Na]<sup>+</sup> 957.2415, C<sub>38</sub>H<sub>55</sub>Cl<sub>2</sub>F<sub>3</sub>N<sub>2</sub>O<sub>13</sub>SSi calcd for [M+Na]<sup>+</sup> 957.2415.

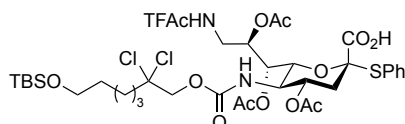

### Compound S10

To a solution of compound **S9** (3.46 g, 3.70 mmol) in pyridine (74 mL) was added LiI (2.48 g, 18.5 mmol) at 0 °C. After stirring for 38 h at 100 °C as the progress of the reaction was monitored by TLC (CHCl<sub>3</sub>/MeOH = 5/1), the reaction mixture was co-evaporated with toluene and diluted with CHCl<sub>3</sub>. The organic layer was washed with 2 M HCl, H<sub>2</sub>O, satd. aq. NaHCO<sub>3</sub> and brine, dried over Na<sub>2</sub>SO<sub>4</sub>, and

concentrated. The residue was purified by silica gel column chromatography (CHCl<sub>3</sub>/MeOH = 60/1 → 20/1) to give compound **10** (3.20 g, 94%) as a white foam; [α]<sub>D</sub> +26.3° (c 1.0, CHCl<sub>3</sub>); <sup>1</sup>H NMR (500 MHz, CDCl<sub>3</sub>/CD<sub>3</sub>OD = 1/1) δ 7.64–7.34 (m, 5 H, Ph), 5.32 (br d, 1 H, *J*<sub>7,8</sub> = 4.0 Hz, H-7), 5.17 (m, 1 H, H-8), 4.95 (td, 1 H, *J*<sub>3eq,4</sub> = 4.5 Hz, *J*<sub>3ax,4</sub> = *J*<sub>4,5</sub> = 11.0 Hz, H-4), 4.54 (d, 1 H, *J*<sub>gem</sub> = 12.0 Hz, NHC(=O)OCH<sub>2</sub>), 4.27 (d, 1 H, NHC(=O)OCH<sub>2</sub>), 4.07–4.02 (m, 2 H, H-6, H-9a), 3.64 (t, 2 H, CH<sub>2</sub>OSi(*t*Bu)Me<sub>2</sub>), 3.57–3.51 (m, 2 H, H-5, H-9b), 2.84 (dd, 1 H, *J*<sub>gem</sub> = 12.3 Hz, H-3eq), 2.20 (s, 3 H, Ac), 2.15 (m, 2 H, CCl<sub>2</sub>CH<sub>2</sub>CH<sub>2</sub>), 2.00 (s, 3 H, Ac), 1.98 (s, 3 H, Ac), 1.75 (t, 1 H, H-3ax), 1.67 (m, 2 H, CCl<sub>2</sub>CH<sub>2</sub>CH<sub>2</sub>), 1.57 (m, 2 H, CH<sub>2</sub>), 1.41 (m, 2 H, CH<sub>2</sub>), 0.90 (s, 9 H, OSi(*t*Bu)Me<sub>2</sub>), 0.07 (s, 6 H, Si(*t*Bu)Me<sub>2</sub>); <sup>13</sup>C NMR (125 MHz, CDCl<sub>3</sub>/CD<sub>3</sub>OD = 1/1) δ 171.7, 171.5, 171.4, 158.7, 156.2, 136.7, 130.3, 129.9, 129.2, 117.7, 115.4, 90.9, 88.7, 74.8, 72.4, 71.9, 71.1, 69.2, 63.5, 51.5, 44.5, 39.7, 38.6, 32.9, 26.2, 25.7, 25.0, 21.1, 20.9, 20.8, 18.7, –5.2; HRMS (ESI) *m/z*: found [M–H]<sup>–</sup> 919.2294, C<sub>37</sub>H<sub>53</sub>Cl<sub>2</sub>F<sub>3</sub>N<sub>2</sub>O<sub>13</sub>SSi calcd for [M–H]<sup>–</sup> 919.2294.

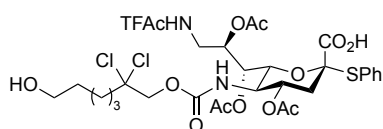

## Compound 27

To a solution of compound **10** (1.50 g, 1.63 mmol) in THF (33 mL) were added AcOH (290 μL, 4.88 mmol) and 1 M TBAF in THF (4.88 mL, 4.88 mmol). After stirring for 36 h at ambient temperature as the progress of the reaction was monitored by TLC (CHCl<sub>3</sub>/MeOH = 3/1), the reaction mixture was diluted with EtOAc. The organic layer was washed with 2 M HCl, H<sub>2</sub>O, satd. aq. NaHCO<sub>3</sub> and brine, dried over Na<sub>2</sub>SO<sub>4</sub>, and concentrated. The residue was purified by silica gel column chromatography (CHCl<sub>3</sub>/MeOH = 40/1 → 10/1) to give compound **27** (1.15 g, 87%) as a white foam; [α]<sub>D</sub> +31.0° (c 1.0, CHCl<sub>3</sub>); <sup>1</sup>H NMR (500 MHz, CDCl<sub>3</sub>/CD<sub>3</sub>OD = 1/1) δ 7.59–7.33 (m, 5 H, Ph), 6.99 (d, 1 H, *J*<sub>5,NH</sub> = 10.0 Hz, NH-5), 5.26 (dd, 1 H, *J*<sub>6,7</sub> = 1.5 Hz, *J*<sub>7,8</sub> = 6.5 Hz, H-7), 5.17 (td, 1 H, *J*<sub>8,9a</sub> = 3.0 Hz, *J*<sub>8,9b</sub> = 6.5 Hz, H-8), 4.92 (td, 1 H, *J*<sub>3eq,4</sub> = 4.7 Hz, *J*<sub>3ax,4</sub> = *J*<sub>4,5</sub> = 10.9 Hz, H-4), 4.53 (d, 1 H, *J*<sub>gem</sub> = 11.5 Hz, NHC(=O)OCH<sub>2</sub>), 4.29 (d, 1 H, NHC(=O)OCH<sub>2</sub>), 4.01 (br d, 1 H, *J*<sub>5,6</sub> = 10.5 Hz, H-6), 3.93 (dd, 1 H, *J*<sub>gem</sub> = 14.8 Hz, H-9a), 3.63–3.57 (m, 3 H, H-5, CH<sub>2</sub>OH), 3.40 (dd, 1 H, H-9b), 2.86 (dd, 1 H, *J*<sub>gem</sub> = 12.5 Hz, H-3eq), 2.22 (s, 3 H, Ac), 2.18 (m, 2 H, CCl<sub>2</sub>CH<sub>2</sub>CH<sub>2</sub>), 2.00 (s, 3 H, Ac), 1.97 (s, 3 H, Ac), 1.85 (t, 1 H, H-3ax), 1.68 (m, 2 H, CCl<sub>2</sub>CH<sub>2</sub>CH<sub>2</sub>), 1.60 (m, 2 H, CH<sub>2</sub>), 1.43 (m, 2 H, CH<sub>2</sub>); <sup>13</sup>C NMR (125 MHz, CDCl<sub>3</sub>/CD<sub>3</sub>OD = 1/1) δ 171.0, 170.1, 170.1, 168.8, 157.7, 157.4, 155.2, 155.2, 135.7, 129.1, 128.4, 128.2, 118.8, 116.6, 114.3, 89.7, 86.5, 73.4, 70.8, 69.5, 69.5, 67.8, 61.1, 50.4, 50.3, 43.5, 43.4, 38.4, 37.5, 31.5, 24.5, 23.9, 19.8, 19.5; HRMS (ESI) *m/z*: found [M–H]<sup>–</sup> 805.1429, C<sub>31</sub>H<sub>39</sub>Cl<sub>2</sub>F<sub>3</sub>N<sub>2</sub>O<sub>13</sub>S calcd for [M–H]<sup>–</sup> 805.1429.

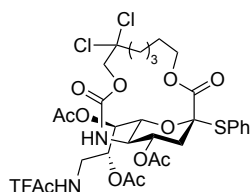

### Compound 28

To a solution of  $\text{PPh}_3$  (1.52 g, 5.79 mmol) in THF (659 mL), a solution of compound **27** (1.17 g, 1.45 mmol) and DMEAD (1.36 g, 5.79 mmol) in THF (181 mL) were added at ambient temperature over a period of 2 h via cannula, followed by washing the flask containing compound **27** and DMTST with THF (66 mL) and transfer to the reaction mixture. After stirring for 1 h at ambient temperature as the progress of the reaction was monitored by TLC (*n*-hexane/acetone = 2/1,  $\text{CHCl}_3/\text{MeOH}$  = 3/1), the reaction was quenched with MeOH and AcOH and the mixture was concentrated. The residue was purified by silica gel column chromatography (*n*-hexane/acetone = 4/1  $\rightarrow$  3/1) to give compound **28** (1.04 g, 91%) as a white foam;  $[\alpha]_D^{+19.5^\circ}$  (c 1.0,  $\text{CHCl}_3$ );  $^1\text{H}$  NMR (500 MHz,  $\text{CD}_3\text{NO}_2$ , 90  $^\circ\text{C}$ )  $\delta$  7.58–7.37 (m, 5 H, Ph), 7.09 (br s, 1 H,  $\text{CF}_3\text{C}(=\text{O})\text{NH}$ ), 5.49 (td, 1 H,  $J_{3eq,4} = 5.0$  Hz,  $J_{3ax,4} = J_{4,5} = 10.7$  Hz, H-4), 5.41 (br s, 1 H, NH-5), 5.37 (br d, 1 H,  $J_{7,8} = 5.9$  Hz, H-7), 5.18 (td, 1 H,  $J_{8,9a} = 3.2$  Hz,  $J_{8,9b} = 5.8$  Hz, H-8), 4.62 (d, 1 H,  $J_{gem} = 12.0$  Hz,  $\text{NHC}(=\text{O})\text{OCH}_2$ ), 4.49–4.44 (m, 3 H, H-6,  $\text{NHC}(=\text{O})\text{OCH}_2$ ,  $\text{C}(=\text{O})\text{OCH}_2$ ), 4.00 (m, 1 H,  $\text{C}(=\text{O})\text{OCH}_2$ ), 3.92 (m, 1 H, H-9a), 3.58 (near dt, 1 H,  $J_{gem} = 14.5$  Hz, H-9b), 3.01 (dd, 1 H,  $J_{gem} = 13.0$  Hz, H-3eq), 2.95 (td, 1 H,  $J_{5,NH} = 6.8$  Hz,  $J_{5,6} = 10.4$  Hz, H-5), 2.43 (m, 1 H,  $\text{CCl}_2\text{CH}_2\text{CH}_2$ ), 2.26 (m, 1 H,  $\text{CCl}_2\text{CH}_2\text{CH}_2$ ), 2.21 (s, 3 H, Ac), 2.00 (s, 6 H, 2 Ac), 1.89–1.83 (m, 3 H, H-3ax,  $\text{CH}_2$ ), 1.65–1.56 (m, 4 H, 2  $\text{CH}_2$ );  $^{13}\text{C}$  NMR (125 MHz,  $\text{CD}_3\text{NO}_2$ , 90  $^\circ\text{C}$ )  $\delta$  172.7, 171.7, 171.6, 169.6, 158.9, 158.6, 155.6, 138.0, 131.4, 130.4, 130.3, 116.5, 91.4, 88.7, 74.7, 72.2, 71.6, 70.9, 69.2, 66.6, 54.6, 46.6, 41.1, 39.8, 28.3, 25.9, 24.1, 21.0, 20.8; HRMS (ESI)  $m/z$ : found  $[\text{M}+\text{Na}]^+$  811.1288,  $\text{C}_{31}\text{H}_{37}\text{Cl}_2\text{F}_3\text{N}_2\text{O}_{12}\text{S}$  calcd for  $[\text{M}+\text{Na}]^+$  811.1289.

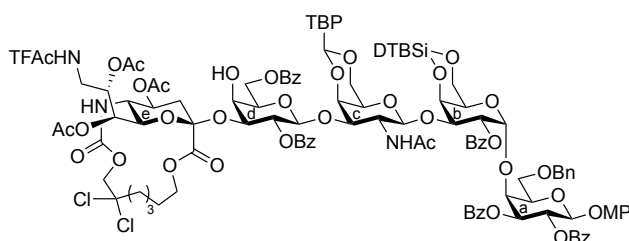

### Compound 30

To a solution of donor **28** (297 mg, 0.376 mmol) and acceptor **23** (214 mg, 0.125 mmol) in  $\text{CH}_2\text{Cl}_2$  (10 mL) were added NIS (101 mg, 0.451 mmol) and 3 Å molecular sieves (511 mg). After stirring for 1 h at ambient temperature, TfOH (2.2  $\mu\text{L}$ , 25.0  $\mu\text{mol}$ ) was added at  $-50$   $^\circ\text{C}$ . After stirring for 10 h at

–50 °C as the progress of the reaction was monitored by TLC (*n*-hexane/CHCl<sub>3</sub>/acetone = 2/1/1, developed twice; CHCl<sub>3</sub>/acetone = 7/1, developed twice), the reaction mixture was neutralized with satd. aq. NaHCO<sub>3</sub> and filtered through a pad of Celite. The pad was washed with CHCl<sub>3</sub>. The combined filtrate and washings were diluted with CHCl<sub>3</sub> and washed with satd. aq. Na<sub>2</sub>S<sub>2</sub>O<sub>3</sub> and brine. The organic layer was dried over Na<sub>2</sub>SO<sub>4</sub> and concentrated. The residue was purified by gel filtration (LH20; CHCl<sub>3</sub>/MeOH = 1/1), then silica gel column chromatography (*n*-hexane/CHCl<sub>3</sub>/acetone = 2/1/1) to give compound **30** (223 mg, 75%) as a white amorphous solid; [α]<sub>D</sub> +60.7° (c 1.0, CHCl<sub>3</sub>); <sup>1</sup>H NMR (500 MHz, CD<sub>3</sub>NO<sub>2</sub>, 80 °C) δ 8.14–6.81 (m, 39 H, 8 Ar, CF<sub>3</sub>C(=O)NH), 5.96 (dd, 1 H, *J*<sub>1,2</sub> = 8.0 Hz, *J*<sub>2,3</sub> = 10.7 Hz, H-2<sup>a</sup>), 5.71 (dd, 1 H, *J*<sub>1,2</sub> = 3.5 Hz, *J*<sub>2,3</sub> = 10.5 Hz, H-2<sup>b</sup>), 5.47 (dd, 1 H, *J*<sub>3,4</sub> = 2.8 Hz, H-3<sup>a</sup>), 5.43 (s, 1 H, ArCH<), 5.37–5.27 (m, 7 H, H-1<sup>a</sup>, H-1<sup>b</sup>, H-4<sup>e</sup>, H-7<sup>e</sup>, H-8<sup>e</sup>, NH-2<sup>c</sup>, NH-5<sup>e</sup>), 5.23 (near t, 1 H, H-2<sup>d</sup>), 5.03 (br s, 1 H, H-1<sup>c</sup>), 4.89 (br s, 1 H, H-4<sup>c</sup>), 4.87 (d, 1 H, *J*<sub>1,2</sub> = 8.0 Hz, H-1<sup>d</sup>), 4.74 (dd, 1 H, *J*<sub>5,6a</sub> = 7.0 Hz, *J*<sub>gem</sub> = 11.5 Hz, H-6a<sup>d</sup>), 4.61–4.22 (m, 12 H, H-4<sup>a</sup>, H-3<sup>b</sup>, H-4<sup>b</sup>, H-3<sup>c</sup>, H-3<sup>d</sup>, H-6b<sup>d</sup>, H-6<sup>e</sup>, 2 PhCH<sub>2</sub>, 2 NHCO(=O)CH<sub>2</sub>, C(=O)OCH<sub>2</sub>), 4.18–4.10 (m, 4 H, H-5<sup>a</sup>, H-5<sup>b</sup>, H-6a<sup>c</sup>, H-5<sup>d</sup>), 4.06 (br s, 1 H, H-4<sup>d</sup>), 3.96–3.88 (m, 2 H, H-9a<sup>e</sup>, C(=O)OCH<sub>2</sub>), 3.80–3.77 (m, 4 H, H-6b<sup>c</sup>, OMe), 3.71–3.61 (m, 3 H, H-6a<sup>a</sup>, H-6b<sup>a</sup>, H-2<sup>c</sup>), 3.54 (d, 1 H, *J*<sub>gem</sub> = 12.8 Hz, H-6a<sup>b</sup>), 3.48 (d, 1 H, H-6b<sup>b</sup>), 3.41 (s, 1 H, H-5<sup>c</sup>), 3.33 (dt, 1 H, *J*<sub>8,9b</sub> = *J*<sub>9b,NH</sub> = 5.9 Hz, *J*<sub>gem</sub> = 14.5 Hz, H-9b<sup>e</sup>), 2.97 (d, 1 H, *J*<sub>4,OH</sub> = 3.5 Hz, OH-4<sup>d</sup>), 2.85 (td, 1 H, *J*<sub>5,NH</sub> = 6.8 Hz, *J*<sub>4,5</sub> = *J*<sub>5,6</sub> = 10.3 Hz, H-5<sup>e</sup>), 2.65 (dd, 1 H, *J*<sub>3eq,4</sub> = 5.3 Hz, *J*<sub>gem</sub> = 12.8 Hz, H-3eq<sup>e</sup>), 2.36 (m, 1 H, CCl<sub>2</sub>CH<sub>2</sub>CH<sub>2</sub>), 2.22 (m, 1 H, CCl<sub>2</sub>CH<sub>2</sub>CH<sub>2</sub>), 2.08 (s, 3 H, Ac), 1.93 (s, 3 H, Ac), 1.91 (s, 3 H, Ac), 1.79–1.69 (m, 3 H, H-3ax<sup>e</sup>, CH<sub>2</sub><sup>e</sup>), 1.63–1.49 (m, 4 H, 2 CH<sub>2</sub><sup>e</sup>), 1.32 (s, 9 H, <sup>t</sup>Bu), 1.04 (s, 9 H, <sup>t</sup>Bu), 1.01 (s, 9 H, <sup>t</sup>Bu), 0.91 (m, 3 H, Ac); <sup>13</sup>C NMR (125 MHz, CD<sub>3</sub>NO<sub>2</sub>, 80 °C) δ 172.8, 172.1, 171.4, 169.4, 167.8, 167.5, 167.3, 167.2, 166.7, 159.2, 158.9, 157.6, 155.7, 153.8, 152.8, 139.8, 137.4, 135.0, 134.8, 134.7, 134.6, 131.9, 131.8, 131.6, 131.4, 131.2, 131.1, 130.9, 130.8, 130.1, 130.1, 129.9, 129.7, 129.0, 129.0, 127.7, 126.3, 120.4, 116.4, 116.2, 103.7, 103.4, 102.5, 99.7, 99.3, 91.4, 79.1, 77.0, 75.7, 75.6, 75.4, 75.2, 75.0, 74.4, 73.8, 72.3, 71.9, 71.4, 70.6, 70.2, 69.9, 69.7, 69.0, 68.2, 68.0, 66.7, 65.2, 56.6, 54.2, 46.3, 41.1, 38.1, 35.6, 31.8, 29.9, 28.4, 28.2, 28.1, 25.5, 24.3, 23.9, 23.2, 21.6, 21.4, 20.9, 20.8; HRMS (ESI) *m/z*: found [M+Na]<sup>+</sup> 2408.7742, C<sub>119</sub>H<sub>136</sub>Cl<sub>2</sub>F<sub>3</sub>N<sub>3</sub>O<sub>39</sub>Si calcd for [M+Na]<sup>+</sup> 2408.7742.

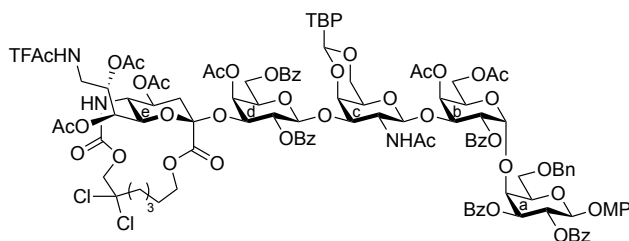

**Compound 31**

To a solution of compound **30** (315 mg, 0.132 mmol) in THF (1.3 mL) was added 1 M TBAHF in THF (1.32 mL, 1.32 mmol). After stirring for 9 h at ambient temperature as the progress of the reaction was monitored by TLC (*n*-hexane/acetone = 1/1), the reaction mixture was diluted with CHCl<sub>3</sub> and washed with 2 M HCl, H<sub>2</sub>O, satd. aq. NaHCO<sub>3</sub> and brine. The organic layer was dried over Na<sub>2</sub>SO<sub>4</sub>, concentrated and dried for 2 h. The residue was dissolved in pyridine (1.3 mL), followed by the addition of Ac<sub>2</sub>O (50.0 μL, 0.528 mmol) and DMAP (1.6 mg, 13.2 μmol) at 0 °C. After stirring for 3.5 h at ambient temperature as the progress of the reaction was monitored by TLC (*n*-hexane/acetone = 1/1), the reaction was quenched with MeOH at 0 °C and diluted with CHCl<sub>3</sub>. The organic layer was washed with 2 M HCl, H<sub>2</sub>O, satd. aq. NaHCO<sub>3</sub> and brine, dried over Na<sub>2</sub>SO<sub>4</sub>, and concentrated. The residue was purified by silica gel column chromatography (*n*-hexane/CHCl<sub>3</sub>/acetone = 3/2/2) to give compound **31** (303 mg, 97%) as a white amorphous solid; [α]<sub>D</sub> +42.3° (c 1.0, CHCl<sub>3</sub>); <sup>1</sup>H NMR (500 MHz, CD<sub>3</sub>NO<sub>2</sub>, 80 °C) δ 8.17–6.78 (m, 39 H, 8 Ar, CF<sub>3</sub>C(=O)NH), 6.01 (dd, 1 H, *J*<sub>1,2</sub> = 8.0 Hz, *J*<sub>2,3</sub> = 10.5 Hz, H-2<sup>a</sup>), 5.58 (dd, 1 H, *J*<sub>3,4</sub> = 3.0 Hz, H-3<sup>a</sup>), 5.54 (d, 1 H, *J*<sub>3,4</sub> = 3.0 Hz, H-4<sup>b</sup>), 5.48–5.44 (m, 3 H, H-2<sup>b</sup>, H-8<sup>e</sup>, ArCH<), 5.39–5.34 (m, 5 H, H-1<sup>a</sup>, H-1<sup>b</sup>, H-4<sup>d</sup>, H-4<sup>e</sup>, NH-5<sup>e</sup>), 5.24–5.20 (m, 2 H, H-2<sup>d</sup>, H-7<sup>e</sup>), 4.97 (d, 1 H, *J*<sub>1,2</sub> = 8.0 Hz, H-1<sup>d</sup>), 4.90 (br d, 1 H, *J*<sub>1,2</sub> = 8.0 Hz, H-1<sup>c</sup>), 4.83 (dd, 1 H, *J*<sub>3,4</sub> = 3.0 Hz, *J*<sub>2,3</sub> = 10.0 Hz, H-3<sup>d</sup>), 4.70–4.04 (m, 17 H, H-4<sup>a</sup>, H-5<sup>a</sup>, H-3<sup>b</sup>, H-5<sup>b</sup>, H-3<sup>c</sup>, H-4<sup>c</sup>, H-6a<sup>c</sup>, H-5<sup>d</sup>, H-6a<sup>d</sup>, H-6b<sup>d</sup>, H-6<sup>e</sup>, 2 PhCH<sub>2</sub>, 2 NHCO(=O)CH<sub>2</sub>, 2 C(=O)OCH<sub>2</sub>), 3.91 (br d, 1 H, *J*<sub>gem</sub> = 14.8 Hz, H-9a<sup>e</sup>), 3.83 (d, 1 H, *J*<sub>gem</sub> = 13.5 Hz, H-6b<sup>c</sup>), 3.76 (s, 3 H, OMe), 3.71–3.62 (m, 5 H, H-6a<sup>a</sup>, H-6b<sup>a</sup>, H-6a<sup>b</sup>, H-6b<sup>b</sup>, H-2<sup>c</sup>), 3.44 (s, 1 H, H-5<sup>c</sup>), 3.25 (near d, 1 H, H-9b<sup>e</sup>), 2.80 (t, 1 H, *J*<sub>4,5</sub> = *J*<sub>5,6</sub> = 10.3 Hz, H-5<sup>e</sup>), 2.64 (dd, 1 H, *J*<sub>3eq,4</sub> = 4.0 Hz, *J*<sub>gem</sub> = 12.0 Hz, H-3eq<sup>e</sup>), 2.32 (m, 1 H, CCl<sub>2</sub>CH<sub>2</sub>CH<sub>2</sub>), 2.26 (m, 1 H, CCl<sub>2</sub>CH<sub>2</sub>CH<sub>2</sub>), 2.13 (s, 3 H, Ac), 2.11 (s, 3 H, Ac), 2.08 (s, 3 H, Ac), 1.94 (s, 3 H, Ac), 1.84–1.46 (m, 10 H, H-3ax<sup>e</sup>, 3 CH<sub>2</sub><sup>e</sup>, Ac), 1.32 (s, 9 H, <sup>t</sup>Bu), 1.00 (m, 3 H, Ac); <sup>13</sup>C NMR (125 MHz, CD<sub>3</sub>NO<sub>2</sub>, 80 °C) δ 173.1, 172.6, 172.2, 171.8, 169.5, 167.8, 167.7, 167.5, 167.0, 157.8, 154.1, 153.2, 140.1, 137.7, 135.3, 135.1, 135.0, 132.0, 131.9, 131.6, 131.3, 131.3, 131.1, 130.3, 130.2, 130.0, 129.3, 129.2, 127.9, 126.7, 120.5, 116.5, 104.0, 102.7, 98.4, 91.8, 79.9, 77.0, 75.9, 75.3, 74.7, 74.5, 73.6, 72.9, 72.5, 72.3, 72.2, 72.1, 70.5, 70.4, 70.1, 69.6, 68.6, 67.1, 64.4, 56.9, 41.1, 39.0, 35.9, 32.1, 28.5, 25.9, 24.4, 21.9, 21.3, 21.2, 21.1, 21.0; HRMS (ESI) *m/z*: found [M+Na]<sup>+</sup> 2394.7036, C<sub>117</sub>H<sub>126</sub>Cl<sub>2</sub>F<sub>3</sub>N<sub>3</sub>O<sub>42</sub> calcd for [M+Na]<sup>+</sup> 2394.7037.

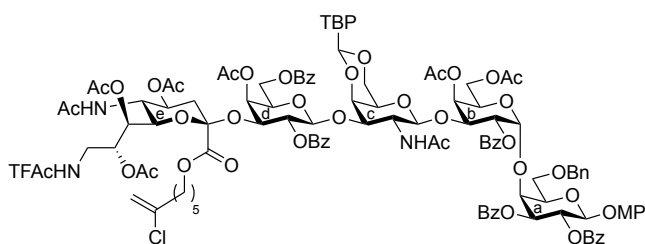



## Compound 32

To a solution of compound **31** (282 mg, 0.119 mmol) in MeCN/AcOH = 4/1 (12 mL) were added Ac<sub>2</sub>O (2.4 mL) and zinc powder (3.11 g, <50 nm particle size). After stirring for 2.5 h at ambient temperature as the progress of the reaction was monitored by TLC (CHCl<sub>3</sub>/MeOH = 30/1, developed twice; toluene/acetone = 2/1), the reaction mixture was filtered through a pad of Celite. The pad was washed with CHCl<sub>3</sub>. The combined filtrate and washings were diluted with CHCl<sub>3</sub>, washed with satd. aq. NaHCO<sub>3</sub> and brine, dried over Na<sub>2</sub>SO<sub>4</sub>, and concentrated. The residue was purified by silica gel column chromatography (toluene/acetone = 4/1 → 3/1) to give compound **32** (249 mg, 90%) as a white amorphous solid; [α]<sub>D</sub> +72.8° (c 1.0, CHCl<sub>3</sub>); <sup>1</sup>H NMR (500 MHz, CD<sub>3</sub>CN) δ 8.11–6.79 (m, 39 H, 8 Ar, CF<sub>3</sub>C(=O)NH), 6.01 (d, 1 H, *J*<sub>5,NH</sub> = 9.5 Hz, NH-5<sup>e</sup>), 5.94 (dd, 1 H, *J*<sub>1,2</sub> = 7.5 Hz, *J*<sub>2,3</sub> = 10.5 Hz, H-2<sup>a</sup>), 5.82 (d, 1 H, *J*<sub>2,NH</sub> = 9.0 Hz, NH-2<sup>c</sup>), 5.61 (dd, 1 H, *J*<sub>3,4</sub> = 3.0 Hz, H-3<sup>a</sup>), 5.47 (d, 1 H, *J*<sub>3,4</sub> = 3.0 Hz, H-4<sup>b</sup>), 5.42 (m, 1 H, H-8<sup>e</sup>), 5.38–5.34 (m, 3 H, H-1<sup>a</sup>, H-2<sup>b</sup>, ArCH<), 5.27 (d, 1 H, *J*<sub>3,4</sub> = 3.0 Hz, H-4<sup>d</sup>), 5.22–5.21 (m, 2 H, H-1<sup>b</sup>, C(=CH<sub>2</sub>)Cl), 5.16 (d, 1 H, *J*<sub>gem</sub> = 1.0 Hz, C(=CH<sub>2</sub>)Cl), 5.13–5.09 (m, 2 H, H-2<sup>d</sup>, H-7<sup>e</sup>), 4.85 (d, 1 H, *J*<sub>1,2</sub> = 8.0 Hz, H-1<sup>d</sup>), 4.83–4.76 (m, 3 H, H-1<sup>c</sup>, H-3<sup>d</sup>, H-4<sup>e</sup>), 4.57 (near t, 1 H, H-5<sup>a</sup>), 4.53–4.49 (m, 2 H, H-3<sup>b</sup>, H-6a<sup>d</sup>), 4.46 (d, 1 H, H-4<sup>a</sup>), 4.27–4.22 (m, 5 H, H-4<sup>c</sup>, H-5<sup>d</sup>, H-6b<sup>d</sup>, PhCH<sub>2</sub>, C(=O)OCH<sub>2</sub>), 4.20 (d, 1 H, *J*<sub>gem</sub> = 11.5 Hz, PhCH<sub>2</sub>), 4.14–4.11 (m, 2 H, H-5<sup>b</sup>, H-6a<sup>c</sup>), 4.02 (dt, 1 H, C(=O)OCH<sub>2</sub>), 3.96 (br d, 1 H, H-3<sup>c</sup>), 3.86 (near q, 1 H, H-5<sup>e</sup>), 3.78–3.70 (m, 6 H, H-6b<sup>c</sup>, H-6<sup>e</sup>, H-9a<sup>e</sup>, OMe), 3.61–3.47 (m, 5 H, H-6a<sup>a</sup>, H-6b<sup>a</sup>, H-6a<sup>b</sup>, H-6b<sup>b</sup>, H-2<sup>c</sup>), 3.33 (s, 1 H, H-5<sup>c</sup>), 3.10 (dt, 1 H, *J*<sub>8,9b</sub> = *J*<sub>9b,NH</sub> = 6.3 Hz, *J*<sub>gem</sub> = 15.0 Hz, H-9b<sup>e</sup>), 2.42 (dd, 1 H, *J*<sub>3eq,4</sub> = 4.8 Hz, *J*<sub>gem</sub> = 12.8 Hz, H-3eq<sup>e</sup>), 3.47 (t, 2 H, C(=CH<sub>2</sub>)ClCH<sub>2</sub>), 2.12 (s, 3 H, Ac), 2.06 (s, 3 H, Ac), 2.06 (s, 3 H, Ac), 1.87 (s, 3 H, Ac), 1.81 (s, 3 H, Ac), 1.76 (s, 3 H, Ac), 1.72 (s, 3 H, Ac), 1.65 (m, 2 H, C(=O)OCH<sub>2</sub>CH<sub>2</sub>), 1.58–1.48 (m, 3 H, H-3ax<sup>e</sup>, C(=CH<sub>2</sub>)CH<sub>2</sub>CH<sub>2</sub>), 1.43–1.30 (m, 11 H, C(=O)OCH<sub>2</sub>CH<sub>2</sub>CH<sub>2</sub>, <sup>t</sup>Bu), 0.81 (s, 3 H, Ac); <sup>13</sup>C NMR (125 MHz, CD<sub>3</sub>CN) δ 172.0, 171.6, 171.2, 171.1, 170.8, 170.7, 170.7, 170.5, 168.3, 166.7, 166.6, 166.4, 166.4, 166.1, 158.6, 158.3, 158.1, 156.6, 153.0, 152.0, 143.9, 139.0, 136.8, 134.7, 134.6, 134.5, 134.3, 134.3, 131.1, 131.0, 131.0, 130.9, 130.6, 130.5, 130.5, 130.3, 130.3, 130.1, 129.7, 129.7, 129.6, 129.6, 129.5, 129.3, 128.6, 128.5, 127.1, 126.1, 119.4, 118.6, 115.9, 115.5, 113.0, 103.5, 102.0, 101.6, 101.0, 98.4, 97.3, 79.3, 79.1, 76.0, 74.6, 74.0, 73.7, 73.5, 72.8, 72.0, 71.9, 71.2, 70.9, 70.4, 70.2, 69.7, 69.4, 68.8, 68.2, 67.3, 67.2, 63.4, 62.9, 56.2, 54.6, 51.9, 49.1, 40.7, 39.3, 38.0, 35.3, 31.5, 28.5, 27.5, 25.4, 23.0, 22.5, 21.6, 21.4, 21.3, 21.2, 21.0, 20.9, 20.7; HRMS (ESI) *m/z*: found [M+Na]<sup>+</sup> 2358.7633, C<sub>118</sub>H<sub>129</sub>ClF<sub>3</sub>N<sub>3</sub>O<sub>41</sub> calcd for [M+Na]<sup>+</sup> 2358.7634.

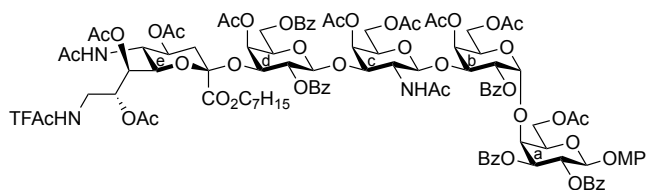

### Compound 33

To a solution of compound **32** (37.9 mg, 16.2  $\mu\text{mol}$ ) in 1,4-dioxane/MeOH = 1/1 (0.80 mL) was added Pd(OH)<sub>2</sub>-C (75.8 mg, 20% on carbon). After stirring for 3.5 h at ambient temperature under H<sub>2</sub> gas as the progress of the reaction was monitored by TLC (CHCl<sub>3</sub>/MeOH = 20/1), the reaction mixture was filtered through a pad of Celite, the pad was washed with CHCl<sub>3</sub>, the combined filtrate and washings were concentrated, and dried for 2 h. The residue was dissolved in pyridine (0.32 mL), followed by the addition of Ac<sub>2</sub>O (7.7  $\mu\text{L}$ , 81.0  $\mu\text{mol}$ ) and DMAP (0.2 mg, 1.62  $\mu\text{mol}$ ) at 0 °C. After stirring for 55 h at ambient temperature, the reaction was quenched with MeOH at 0 °C, and the mixture was co-evaporated with toluene, and diluted with CHCl<sub>3</sub>. The organic layer was washed with 2 M HCl, H<sub>2</sub>O, satd. aq. NaHCO<sub>3</sub> and brine, dried over Na<sub>2</sub>SO<sub>4</sub>, and concentrated. The residue was purified by silica gel column chromatography (CHCl<sub>3</sub>/MeOH = 100/1) to give compound **33** (29.1 mg, 82%) as a white amorphous solid;  $[\alpha]_D^{+58.7}$  (c 1.0, CHCl<sub>3</sub>); <sup>1</sup>H NMR (500 MHz, CD<sub>3</sub>CN)  $\delta$  7.97–6.74 (m, 30 H, 6 Ar, CF<sub>3</sub>C(=O)NH), 5.87 (d, 1 H,  $J_{5,\text{NH}}$  = 9.5 Hz, NH-5<sup>e</sup>), 5.75 (dd, 1 H,  $J_{1,2}$  = 7.5 Hz,  $J_{2,3}$  = 10.4 Hz, H-2<sup>a</sup>), 5.58 (d, 1 H,  $J_{2,\text{NH}}$  = 9.0 Hz, NH-2<sup>c</sup>), 5.46 (dd, 1 H,  $J_{3,4}$  = 2.9 Hz, H-3<sup>a</sup>), 5.41 (d, 1 H,  $J_{3,4}$  = 3.0 Hz, H-4<sup>b</sup>), 5.27–5.21 (m, 4 H, H-1<sup>a</sup>, H-2<sup>b</sup>, H-4<sup>c</sup>, H-8<sup>e</sup>), 5.12 (d, 1 H,  $J_{3,4}$  = 3.5 Hz, H-4<sup>d</sup>), 5.10 (d, 1 H,  $J_{1,2}$  = 3.5 Hz, H-1<sup>b</sup>), 4.95–4.90 (m, 2 H, H-2<sup>d</sup>, H-7<sup>e</sup>), 4.74 (d, 1 H,  $J_{1,2}$  = 8.0 Hz, H-1<sup>d</sup>), 4.68–4.63 (m, 2 H, H-3<sup>d</sup>, H-4<sup>e</sup>), 4.60 (d, 1 H,  $J_{1,2}$  = 8.5 Hz, H-1<sup>c</sup>), 4.46 (near t, 1 H, H-5<sup>c</sup>), 4.34 (dd, 1 H,  $J_{2,3}$  = 10.5 Hz, H-3<sup>b</sup>), 4.32 (d, 1 H, H-4<sup>a</sup>), 4.29 (dd, 1 H,  $J_{5,6a}$  = 5.5 Hz,  $J_{\text{gem}}$  = 10.0 Hz, H-6a<sup>d</sup>), 4.23 (dd, 1 H,  $J_{5,6a}$  = 7.5 Hz,  $J_{\text{gem}}$  = 11.0 Hz, H-6a<sup>a</sup>), 4.09 (dt, 1 H, C(=O)OCH<sub>2</sub>), 4.05–3.96 (m, 4 H, H-5<sup>a</sup>, H-3<sup>c</sup>, H-5<sup>d</sup>, H-6b<sup>d</sup>), 3.92–3.81 (m, 4 H, H-6b<sup>a</sup>, H-6a<sup>b</sup>, H-6<sup>e</sup>, C(=O)OCH<sub>2</sub>), 3.71–3.55 (m, 9 H, H-5<sup>b</sup>, H-6b<sup>b</sup>, H-2<sup>c</sup>, H-6a<sup>c</sup>, H-5<sup>e</sup>, H-9a<sup>e</sup>, OMe), 3.51 (dd, 1 H,  $J_{5,6b}$  = 6.5 Hz,  $J_{\text{gem}}$  = 11.5 Hz, H-6b<sup>c</sup>), 2.90 (dt, 1 H,  $J_{8,9b}$  =  $J_{9b,\text{NH}}$  = 5.8 Hz,  $J_{\text{gem}}$  = 15.0 Hz, H-9b<sup>e</sup>), 2.30 (dd, 1 H,  $J_{3eq,4}$  = 4.5 Hz,  $J_{\text{gem}}$  = 12.5 Hz, H-3eq<sup>e</sup>), 1.99 (s, 3 H, Ac), 1.95 (s, 3 H, Ac), 1.94 (s, 3 H, Ac), 1.92 (s, 3 H, Ac), 1.92 (s, 3 H, Ac), 1.79 (s, 3 H, Ac), 1.76 (s, 3 H, Ac), 1.71 (s, 3 H, Ac), 1.58 (s, 3 H, Ac), 1.58 (s, 3 H, Ac), 1.49 (t, 2 H, C(=O)OCH<sub>2</sub>CH<sub>2</sub>), 1.35 (t, 1 H,  $J_{3ax,4}$  = 12.3 Hz, H-3ax<sup>e</sup>), 1.21–1.16 (m, 8 H, C(=O)OCH<sub>2</sub>CH<sub>2</sub>CH<sub>2</sub>, CH<sub>2</sub>CH<sub>2</sub>CH<sub>2</sub>Me, CH<sub>2</sub>CH<sub>2</sub>Me, CH<sub>2</sub>Me), 0.79 (t, 3 H, CH<sub>2</sub>Me), 0.60 (s, 3 H, Ac); <sup>13</sup>C NMR (125 MHz, CD<sub>3</sub>CN)  $\delta$  172.1, 171.5, 171.4, 171.0, 171.0, 170.9, 170.9, 170.8, 170.6, 170.6, 170.2, 168.3, 166.5, 166.5, 166.4, 166.2, 165.9, 158.5, 158.2, 156.6, 151.9, 134.7, 134.6, 134.4, 134.3, 134.3, 131.0, 130.9, 130.9, 130.6, 130.4, 130.3, 130.1, 129.6, 129.6, 129.6, 119.1, 118.6, 115.9, 115.5, 102.5, 102.2, 100.9, 98.7, 98.2, 79.1, 78.0, 75.5, 73.9, 73.8, 73.5, 72.7, 72.2, 72.0, 71.5, 71.4, 71.0, 70.9, 70.2,

70.0, 69.1, 68.8, 68.7, 67.5, 63.6, 62.9, 62.7, 62.3, 56.2, 52.4, 49.0, 40.3, 38.0, 32.3, 29.6, 28.8, 26.4, 23.3, 23.0, 22.2, 21.5, 21.2, 21.1, 21.1, 20.9, 20.9, 20.9, 20.8, 20.8, 14.3; HRMS (ESI)  $m/z$ : found  $[M+Na]^+$  2218.7088,  $C_{106}H_{120}F_3N_3O_{44}$  calcd for  $[M+Na]^+$  2218.7089.

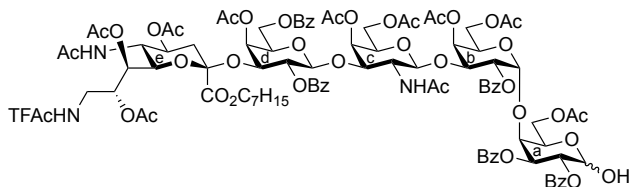

### Compound 34

To a solution of compound **33** (28.0 mg, 12.7  $\mu$ mol) in MeCN/toluene/H<sub>2</sub>O = 6/5/3 (0.26 mL) was added cerium (IV) ammonium nitrate (69.6 mg, 0.127 mmol) at 0 °C. After stirring for 3 h at 0 °C as the progress of the reaction was monitored by TLC (CHCl<sub>3</sub>/MeOH = 30/1, developed twice), the reaction mixture was diluted with EtOAc. The organic layer was washed with H<sub>2</sub>O, satd. aq. NaHCO<sub>3</sub> and brine, dried over Na<sub>2</sub>SO<sub>4</sub>, and concentrated. The residue was purified by silica gel column chromatography (CHCl<sub>3</sub>/MeOH = 60/1  $\rightarrow$  50/1) to give compound **34** (17.4 mg, 65%,  $\alpha$ : $\beta$  = 1:0.3) as a white amorphous solid;  $\alpha$  isomer; <sup>1</sup>H NMR (500 MHz, CD<sub>3</sub>CN)  $\delta$  8.05–7.35 (m, 26 H, 5 Ph, CF<sub>3</sub>C(=O)NH), 5.94 (d, 1 H,  $J_{5,NH}$  = 9.5 Hz, NH-5<sup>e</sup>), 5.78 (dd, 1 H,  $J_{2,3}$  = 10.5 Hz,  $J_{3,4}$  = 3.0 Hz, H-3<sup>a</sup>), 5.64 (d, 1 H,  $J_{2,NH}$  = 9.0 Hz, NH-2<sup>c</sup>), 5.55 (t, 1 H,  $J_{1,2}$  =  $J_{1,OH}$  = 3.8 Hz, H-1<sup>a</sup>), 5.49–5.45 (m, 2 H, H-2<sup>a</sup>, H-4<sup>b</sup>), 5.36–5.32 (m, 2 H, H-4<sup>c</sup>, H-8<sup>e</sup>), 5.28–5.21 (m, 3 H, H-1<sup>b</sup>, H-2<sup>b</sup>, H-4<sup>d</sup>), 5.04–4.98 (m, 2 H, H-2<sup>d</sup>, H-7<sup>e</sup>), 4.82 (d, 1 H,  $J_{1,2}$  = 8.0 Hz, H-1<sup>d</sup>), 4.76–4.69 (m, 4 H, H-1<sup>c</sup>, H-3<sup>d</sup>, H-4<sup>e</sup>, OH-1<sup>a</sup>), 4.53 (near t, 1 H, H-5<sup>c</sup>), 4.43–4.32 (m, 3 H, H-4<sup>a</sup>, H-3<sup>b</sup>, H-6a<sup>d</sup>), 4.23 (dd, 1 H,  $J_{5,6a}$  = 7.5 Hz,  $J_{gem}$  = 11.0 Hz, H-6a<sup>a</sup>), 4.17 (dt, 1 H, C(=O)OCH<sub>2</sub>), 4.12–3.90 (m, 7 H, H-5<sup>a</sup>, H-6b<sup>a</sup>, H-6a<sup>b</sup>, H-3<sup>c</sup>, H-5<sup>d</sup>, H-6b<sup>d</sup>, C(=O)OCH<sub>2</sub>), 3.79–3.59 (m, 8 H, H-5<sup>b</sup>, H-6b<sup>b</sup>, H-2<sup>c</sup>, H-6a<sup>c</sup>, H-6b<sup>c</sup>, H-5<sup>e</sup>, H-6<sup>e</sup>, H-9a<sup>e</sup>), 2.99 (dt, 1 H,  $J_{8,9b}$  =  $J_{9b,NH}$  = 5.9 Hz,  $J_{gem}$  = 15.0 Hz, H-9b<sup>e</sup>), 2.38 (dd, 1 H,  $J_{3eq,4}$  = 4.5 Hz,  $J_{gem}$  = 12.4 Hz, H-3eq<sup>e</sup>), 2.11–1.58 (m, 30 H, 10 Ac), 1.57 (m, 2 H, C(=O)OCH<sub>2</sub>CH<sub>2</sub>), 1.44 (t, 1 H,  $J_{3ax,4}$  = 12.3 Hz, H-3ax<sup>e</sup>), 1.27–1.24 (m, 8 H, C(=O)OCH<sub>2</sub>CH<sub>2</sub>CH<sub>2</sub>, CH<sub>2</sub>CH<sub>2</sub>CH<sub>2</sub>Me, CH<sub>2</sub>CH<sub>2</sub>Me, CH<sub>2</sub>Me), 0.86 (t, 3 H, CH<sub>2</sub>Me), 0.69 (s, 3 H, Ac); HRMS (ESI)  $m/z$ : found  $[M+Na]^+$  2112.6671,  $C_{99}H_{114}F_3N_3O_{43}$  calcd for  $[M+Na]^+$  2112.6670.

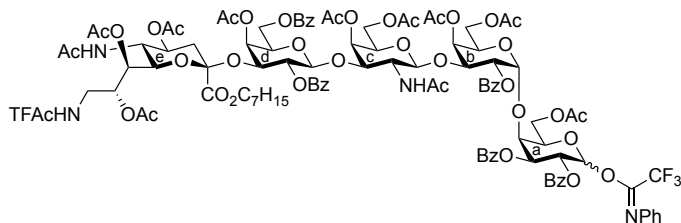

## Compound 35

To a solution of compound **34** (72.5 mg, 34.7  $\mu$ mol) in acetone (0.69 mL) were added  $\text{CF}_3\text{C(=NPh)Cl}$  (11.2  $\mu$ L, 69.3  $\mu$ mol) and  $\text{K}_2\text{CO}_3$  (23.9 mg, 0.173 mmol). After stirring for 10 h at ambient temperature as the progress of the reaction was monitored by TLC ( $\text{CHCl}_3/\text{MeOH} = 20/1$ ), the reaction mixture was concentrated. The residue was purified by silica gel column chromatography ( $\text{CHCl}_3/\text{MeOH} = 80/1$ ) to give compound **35** (73.6 mg, 94%,  $\alpha:\beta = 1:0.3$ ) as a white amorphous solid;  $\alpha$  isomer;  $^1\text{H}$  NMR (500 MHz,  $\text{CD}_3\text{CN}$ )  $\delta$  8.05–6.54 (m, 31 H, 6 Ph,  $\text{CF}_3\text{C(=O)NH}$ ), 6.13 (br s, 1 H, H-1<sup>a</sup>), 5.95 (d, 1 H,  $J_{5,\text{NH}} = 9.5$  Hz, NH-5<sup>e</sup>), 5.88 (near d, 1 H, H-3<sup>a</sup>), 5.73 (br d, 1 H, H-2<sup>a</sup>), 5.67 (d, 1 H,  $J_{2,\text{NH}} = 9.0$  Hz, NH-2<sup>c</sup>), 5.47 (d, 1 H,  $J_{3,4} = 3.5$  Hz, H-4<sup>b</sup>), 5.35–5.32 (m, 2 H, H-4<sup>c</sup>, H-8<sup>e</sup>), 5.29–5.26 (m, 2 H, H-1<sup>b</sup>, H-2<sup>b</sup>), 5.19 (d, 1 H,  $J_{3,4} = 2.5$  Hz, H-4<sup>d</sup>), 5.02–4.98 (m, 2 H, H-2<sup>d</sup>, H-7<sup>e</sup>), 4.81 (d, 1 H,  $J_{1,2} = 8.0$  Hz, H-1<sup>d</sup>), 4.75–4.66 (m, 3 H, H-1<sup>c</sup>, H-3<sup>d</sup>, H-4<sup>e</sup>), 4.55 (near t, 1 H, H-5<sup>c</sup>), 4.45–4.28 (m, 5 H, H-4<sup>a</sup>, H-6a<sup>a</sup>, H-6b<sup>a</sup>, H-3<sup>b</sup>, H-6a<sup>d</sup>), 4.16 (dt, 1 H,  $\text{C(=O)OCH}_2^e$ ), 4.11–4.04 (m, 3 H, H-3<sup>c</sup>, H-5<sup>d</sup>, H-6b<sup>d</sup>), 3.98–3.88 (m, 4 H, H-5<sup>a</sup>, H-6a<sup>b</sup>, H-6b<sup>b</sup>,  $\text{C(=O)OCH}_2$ ), 3.79–3.60 (m, 7 H, H-5<sup>b</sup>, H-2<sup>c</sup>, H-6a<sup>c</sup>, H-6b<sup>c</sup>, H-5<sup>e</sup>, H-6<sup>e</sup>, H-9a<sup>e</sup>), 2.98 (dt, 1 H,  $J_{8,9b} = J_{9b,\text{NH}} = 6.0$  Hz,  $J_{\text{gem}} = 14.5$  Hz, H-9b<sup>e</sup>), 2.38 (dd, 1 H,  $J_{3eq,4} = 5.0$  Hz,  $J_{\text{gem}} = 12.3$  Hz, H-3eq<sup>e</sup>), 2.14–1.55 (m, 32 H, 10 Ac,  $\text{C(=O)OCH}_2\text{CH}_2$ ), 1.41 (t, 1 H,  $J_{3ax,4} = 12.0$  Hz, H-3ax<sup>e</sup>), 1.26–1.20 (m, 8  $\text{CH}_2^e$ ), 0.86 (t, 3 H,  $\text{CH}_2\text{Me}^{\text{Cer}}$ ), 0.63 (s, 3 H, Ac); HRMS (ESI)  $m/z$ : found  $[\text{M}+\text{Na}]^+$  2283.6966,  $\text{C}_{107}\text{H}_{118}\text{F}_6\text{N}_4\text{O}_{43}$  calcd for  $[\text{M}+\text{Na}]^+$  2283.6966.

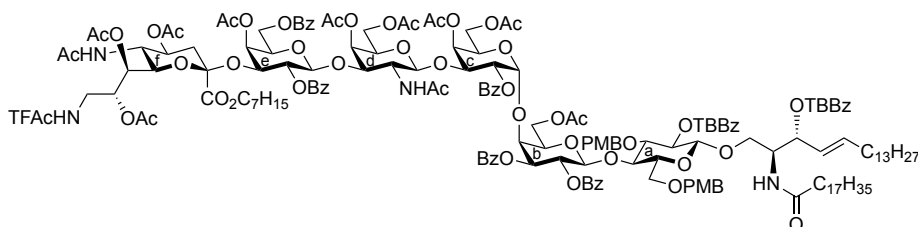

## Compound 36

To a solution of donor **35** (127 mg, 56.1  $\mu$ mol) and acceptor **17**<sup>S03</sup> (108 mg, 84.1  $\mu$ mol) in  $\text{CH}_2\text{Cl}_2$  (2.8 mL) was added 4 Å molecular sieves (AW-300, 280 mg). After stirring for 1 h at ambient temperature, TMSOTf (2.0  $\mu$ L, 11.2  $\mu$ mol) was added at 0 °C. After stirring for 8 h at 0 °C as the progress of the reaction was monitored by TLC (toluene/acetone = 5/2), the reaction mixture was neutralized with satd. aq.  $\text{NaHCO}_3$  and filtered through a pad of Celite. The pad was washed with  $\text{CHCl}_3$ . The combined filtrate and washings were diluted with  $\text{CHCl}_3$  and washed with brine. The organic layer was dried over  $\text{Na}_2\text{SO}_4$  and concentrated. The residue was purified by silica gel column chromatography (toluene/acetone = 10/1  $\rightarrow$  4/1) to give compound **36** (129 mg, 68%) as a white amorphous solid;  $[\alpha]_D^{+65.7^\circ}$  (c 1.0,  $\text{CHCl}_3$ );  $^1\text{H}$  NMR (500 MHz,  $\text{CDCl}_3$ )  $\delta$  8.05–6.67 (m, 42 H, 9 Ar,  $\text{CF}_3\text{C(=O)NH}$ ), 5.78

(near quin, 1 H,  $J_{5,6a} = J_{5,6b} = 6.5$  Hz,  $J_{4,5} = 15.4$  Hz, H-5<sup>Cer</sup>), 5.68–5.64 (m, 2 H, H-2<sup>b</sup>, NH-2<sup>Cer</sup>), 5.46 (t, 1 H,  $J_{2,3} = J_{3,4} = 7.3$  Hz, H-3<sup>Cer</sup>), 5.42 (d, 1 H,  $J_{3,4} = 2.5$  Hz, H-4<sup>c</sup>), 5.39 (dd, 1 H, H-4<sup>Cer</sup>), 5.34–5.30 (m, 2 H, H-2<sup>c</sup>, H-8<sup>f</sup>), 5.28 (d, 1 H,  $J_{3,4} = 3.0$  Hz, H-4<sup>d</sup>), 5.17–5.09 (m, 5 H, H-2<sup>a</sup>, H-3<sup>b</sup>, H-1<sup>c</sup>, H-2<sup>e</sup>, H-4<sup>e</sup>), 5.02–5.00 (m, 2 H, NH-2<sup>d</sup>, NH-5<sup>f</sup>), 4.95–4.89 (m, 3 H, H-1<sup>b</sup>, H-1<sup>d</sup>, H-7<sup>f</sup>), 4.80–4.75 (m, 2 H, H-1<sup>e</sup>, H-4<sup>f</sup>), 4.66 (d, 1 H,  $J_{gem} = 11.3$  Hz, ArCH<sub>2</sub>), 4.60 (d, 1 H, ArCH<sub>2</sub>), 4.58 (dd, 1 H,  $J_{3,4} = 3.5$  Hz,  $J_{2,3} = 10.0$  Hz, H-3<sup>e</sup>), 4.45–4.32 (m, 6 H, H-1<sup>a</sup>, H-3<sup>d</sup>, H-5<sup>d</sup>, H-6a<sup>e</sup>, H-2<sup>Cer</sup>, ArCH<sub>2</sub>), 4.30–4.27 (m, 2 H, H-3<sup>c</sup>, H-5<sup>c</sup>), 4.23 (d, 1 H,  $J_{3,4} = 2.5$  Hz, H-4<sup>b</sup>), 4.20–3.90 (m, 11 H, H-4<sup>a</sup>, H-6<sup>b</sup>, H-5<sup>e</sup>, H-6b<sup>e</sup>, H-5<sup>f</sup>, H-9a<sup>f</sup>, H-1a<sup>Cer</sup>, H-1b<sup>Cer</sup>, ArCH<sub>2</sub>, C(=O)OCH<sub>2</sub>), 3.83–3.69 (m, 9 H, H-3<sup>a</sup>, H-6b<sup>b</sup>, H-6a<sup>d</sup>, 2 OMe), 3.65–3.58 (m, 2 H, H-6a<sup>c</sup>, H-6b<sup>d</sup>), 3.52–3.37 (m, 5 H, H-6a<sup>a</sup>, H-6b<sup>a</sup>, H-5<sup>b</sup>, H-6b<sup>c</sup>, H-6<sup>f</sup>), 3.26 (br d, 1 H, H-5<sup>a</sup>), 3.11 (m, 1 H, H-2<sup>d</sup>), 2.73 (near dt, 1 H, H-9b<sup>f</sup>), 2.47 (dd, 1 H,  $J_{3eq,4} = 4.5$  Hz,  $J_{gem} = 12.5$  Hz, H-3eq<sup>f</sup>), 2.09 (s, 3 H, Ac), 2.06 (s, 3 H, Ac), 2.03 (s, 3 H, Ac), 1.99 (s, 3 H, Ac), 1.99 (s, 3 H, Ac), 1.95–1.92 (m, 5 H, H-6a<sup>Cer</sup>, H-6b<sup>Cer</sup>, Ac), 1.82 (s, 3 H, Ac), 1.81 (s, 3 H, Ac), 1.70–1.58 (m, 8 H, H-3ax<sup>f</sup>, C(=O)OCH<sub>2</sub>CH<sub>2</sub>), NHC(=O)CH<sub>2</sub>, Ac), 1.38–1.08 (m, 78 H, 4 CH<sub>2</sub><sup>f</sup>, 26 CH<sub>2</sub><sup>Cer</sup>, 2 <sup>t</sup>Bu), 0.89–0.86 (m, 9 H, CH<sub>2</sub>Me<sup>f</sup>, 2 Me<sup>Cer</sup>), 0.73 (s, 3 H, Ac); <sup>13</sup>C NMR (125 MHz, CDCl<sub>3</sub>) δ 172.6, 172.5, 170.7, 170.5, 170.4, 170.3, 170.3, 170.3, 169.9, 169.9, 169.1, 167.3, 166.2, 165.8, 165.6, 165.3, 165.1, 165.0, 164.8, 159.3, 159.1, 158.1, 157.8, 157.0, 156.4, 137.1, 133.6, 133.4, 133.2, 133.1, 130.5, 130.2, 130.1, 130.0, 130.0, 129.9, 129.8, 129.6, 129.5, 129.4, 129.1, 128.9, 128.9, 128.8, 128.7, 128.6, 128.5, 128.5, 128.4, 128.3, 127.6, 126.8, 125.4, 125.3, 124.9, 117.0, 114.8, 113.9, 113.7, 101.1, 100.9, 100.6, 99.4, 98.3, 96.9, 79.2, 79.1, 77.6, 75.3, 74.8, 74.1, 74.0, 73.5, 73.4, 73.2, 72.3, 72.1, 71.8, 71.3, 71.2, 70.8, 70.6, 70.5, 70.3, 70.2, 70.1, 69.3, 68.8, 67.7, 67.5, 67.4, 67.3, 66.9, 66.7, 62.3, 61.3, 61.2, 61.0, 55.2, 55.2, 54.8, 50.4, 48.9, 38.6, 37.4, 36.4, 35.1, 35.0, 32.3, 31.9, 31.7, 31.1, 29.7, 29.7, 29.6, 29.6, 29.5, 29.5, 29.4, 29.3, 29.3, 29.0, 28.8, 28.1, 25.7, 25.6, 23.1, 22.7, 22.5, 22.0, 21.1, 20.8, 20.8, 20.7, 20.6, 20.5, 14.1, 14.1; HRMS (ESI) *m/z*: found [M/2+Na]<sup>+</sup> 1702.7669, C<sub>179</sub>H<sub>233</sub>F<sub>3</sub>N<sub>4</sub>O<sub>54</sub> calcd for [M/2+Na]<sup>+</sup> 1702.7673.

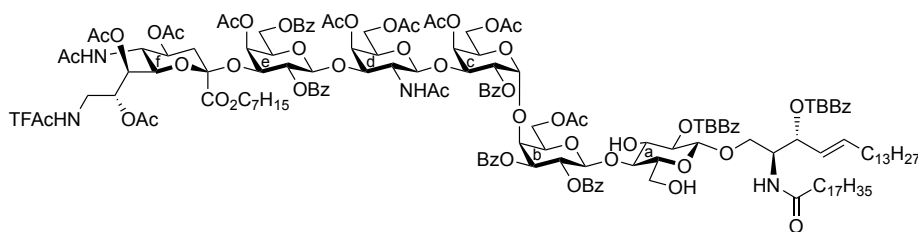

### Compound 37

To a solution of compound **36** (167 mg, 49.7 μmol) in CH<sub>2</sub>Cl<sub>2</sub> (3.3 mL) was added TFA (1.70 mL, 22.2 mmol) at 0 °C. After stirring for 30 min at 0 °C as the progress of the reaction was monitored by TLC (toluene/acetone = 3/1, developed twice), the reaction mixture was neutralized with satd. aq.

NaHCO<sub>3</sub> and diluted with CHCl<sub>3</sub>. The organic layer was washed with satd. aq. NaHCO<sub>3</sub> and brine, dried over Na<sub>2</sub>SO<sub>4</sub>, and concentrated. The residue was purified by silica gel column chromatography (toluene/acetone = 4/1) to give compound **37** (149 mg, 96%) as a white amorphous solid; [α]<sub>D</sub> +73.1° (c 1.2, CHCl<sub>3</sub>); <sup>1</sup>H NMR (500 MHz, CDCl<sub>3</sub>) δ 8.07–7.10 (m, 34 H, 7 Ar, CF<sub>3</sub>C(=O)NH), 5.90 (near quin, 1 H, *J*<sub>5,6a</sub> = *J*<sub>5,6b</sub> = 7.0 Hz, *J*<sub>4,5</sub> = 15.0 Hz, H-5<sup>Cer</sup>), 5.80 (d, 1 H, *J*<sub>2,NH</sub> = 10.0 Hz, NH-2<sup>Cer</sup>), 5.77 (dd, 1 H, *J*<sub>1,2</sub> = 8.2 Hz, *J*<sub>2,3</sub> = 10.9 Hz, H-2<sup>b</sup>), 5.59 (t, 1 H, *J*<sub>2,3</sub> = *J*<sub>3,4</sub> = 8.8 Hz, H-3<sup>Cer</sup>), 5.49 (d, 1 H, *J*<sub>3,4</sub> = 2.5 Hz, H-4<sup>c</sup>), 5.47–5.42 (m, 3 H, H-2<sup>c</sup>, H-4<sup>d</sup>, H-4<sup>Cer</sup>), 5.34 (near dt, 1 H, *J*<sub>7,8</sub> = 10.0 Hz, H-8<sup>f</sup>), 5.26 (dd, 1 H, *J*<sub>3,4</sub> = 2.5 Hz, H-3<sup>b</sup>), 5.21–5.17 (m, 2 H, H-1<sup>d</sup>, H-2<sup>e</sup>), 5.15–5.07 (m, 4 H, H-2<sup>a</sup>, H-4<sup>e</sup>, NH-2<sup>d</sup>, NH-5<sup>f</sup>), 5.01 (d, 1 H, *J*<sub>1,2</sub> = 3.5 Hz, H-1<sup>c</sup>), 4.92 (dd, 1 H, *J*<sub>6,7</sub> = 2.5 Hz, H-7<sup>f</sup>), 4.89 (d, 1 H, H-1<sup>b</sup>), 4.83 (d, 1 H, *J*<sub>1,2</sub> = 7.5 Hz, H-1<sup>e</sup>), 4.79 (td, 1 H, *J*<sub>3eq,4</sub> = 4.2 Hz, *J*<sub>3aq,4</sub> = *J*<sub>4,5</sub> = 11.3 Hz, H-4<sup>f</sup>), 4.68 (dd, 1 H, *J*<sub>3,4</sub> = 3.3 Hz, *J*<sub>2,3</sub> = 10.8 Hz, H-3<sup>d</sup>), 4.60 (dd, 1 H, *J*<sub>3,4</sub> = 3.0 Hz, *J*<sub>2,3</sub> = 10.0 Hz, H-3<sup>e</sup>), 4.49 (d, 1 H, *J*<sub>1,2</sub> = 8.0 Hz, H-1<sup>a</sup>), 4.44–4.38 (m, 3 H, H-5<sup>d</sup>, H-6a<sup>e</sup>, H-2<sup>Cer</sup>), 4.33–4.29 (m, 2 H, H-4<sup>b</sup>, H-3<sup>c</sup>), 4.23–4.11 (m, 5 H, H-6a<sup>b</sup>, H-6a<sup>c</sup>, H-6b<sup>e</sup>, OH-3<sup>a</sup>, C(=O)OCH<sub>2</sub><sup>f</sup>), 4.03–3.84 (m, 11 H, H-3<sup>a</sup>, H-4<sup>a</sup>, H-5<sup>b</sup>, H-6b<sup>b</sup>, H-5<sup>c</sup>, H-6b<sup>c</sup>, H-5<sup>e</sup>, H-5<sup>f</sup>, H-9a<sup>f</sup>, H-1a<sup>Cer</sup>, C(=O)OCH<sub>2</sub>), 3.66 (dd, 1 H, *J*<sub>5,6a</sub> = 7.5 Hz, *J*<sub>gem</sub> = 11.3 Hz, H-6a<sup>d</sup>), 3.56 (dd, 1 H, *J*<sub>1b,2</sub> = 3.0 Hz, *J*<sub>gem</sub> = 9.0 Hz, H-1b<sup>Cer</sup>), 3.49 (dd, 1 H, *J*<sub>5,6</sub> = 11.0 Hz, H-6<sup>f</sup>), 3.36 (dd, 1 H, *J*<sub>5,6b</sub> = 6.0 Hz, H-6b<sup>d</sup>), 3.29 (br t, 1 H, H-6a<sup>a</sup>), 3.17 (br d, 1 H, H-5<sup>a</sup>), 3.08 (m, 1 H, H-2<sup>d</sup>), 3.02 (br d, 1 H, H-6b<sup>a</sup>), 2.87 (m, 1 H, OH-6<sup>a</sup>), 2.75 (near dt, 1 H, H-9b<sup>f</sup>), 2.49 (dd, 1 H, *J*<sub>gem</sub> = 12.5 Hz, H-3eq<sup>f</sup>), 2.10 (s, 3 H, Ac), 2.09 (s, 3 H, Ac), 2.05 (s, 3 H, Ac), 2.03 (s, 3 H, Ac), 2.00–1.95 (m, 10 H, H-6a<sup>Cer</sup>, H-6b<sup>Cer</sup>, NHC(=O)CH<sub>2</sub>, 2 Ac), 1.84 (s, 3 H, Ac), 1.83 (s, 3 H, Ac), 1.81 (s, 3 H, Ac), 1.69–1.64 (m, 4 H, H-3ax<sup>f</sup>, Ac), 1.60–1.58 (m, 2 H, C(=O)OCH<sub>2</sub>CH<sub>2</sub>), 1.50–1.17 (m, 78 H, 4 CH<sub>2</sub><sup>f</sup>, 26 CH<sub>2</sub><sup>Cer</sup>, 2 <sup>t</sup>Bu), 0.89–0.86 (m, 9 H, CH<sub>2</sub>Me<sup>f</sup>, 2 Me<sup>Cer</sup>), 0.77 (s, 3 H, Ac); <sup>13</sup>C NMR (125 MHz, CDCl<sub>3</sub>) δ 172.7, 172.4, 170.6, 170.5, 170.5, 170.3, 170.2, 170.0, 169.9, 169.9, 169.1, 167.3, 166.0, 165.9, 165.6, 165.6, 165.5, 165.1, 164.8, 158.3, 158.0, 157.7, 157.0, 156.9, 138.5, 137.9, 133.7, 133.4, 133.1, 133.1, 130.3, 130.1, 129.9, 129.8, 129.7, 129.7, 129.4, 129.0, 128.9, 128.8, 128.7, 128.6, 128.5, 128.5, 128.4, 128.3, 128.2, 127.3, 127.2, 125.5, 125.4, 125.3, 125.0, 119.3, 117.0, 114.7, 112.5, 102.2, 101.0, 99.6, 99.0, 98.2, 97.0, 81.0, 79.0, 77.7, 74.2, 74.0, 74.0, 73.9, 73.5, 73.4, 72.7, 72.6, 71.8, 71.3, 71.2, 71.2, 70.4, 70.1, 69.5, 69.3, 69.2, 68.8, 67.6, 67.4, 67.3, 66.9, 66.8, 66.1, 62.5, 61.3, 61.3, 61.1, 59.6, 55.3, 50.4, 48.8, 38.6, 37.3, 36.8, 35.2, 35.1, 32.3, 31.9, 31.6, 31.1, 31.1, 29.7, 29.7, 29.7, 29.6, 29.6, 29.5, 29.4, 29.4, 29.3, 29.3, 28.9, 28.8, 28.1, 25.7, 25.6, 23.0, 22.7, 22.5, 22.0, 21.4, 21.1, 20.8, 20.7, 20.6, 20.2, 14.1, 14.1; HRMS (ESI) *m/z*: found [M/2+Na]<sup>+</sup> 1582.7097, C<sub>163</sub>H<sub>217</sub>F<sub>3</sub>N<sub>4</sub>O<sub>52</sub> calcd for [M/2+Na]<sup>+</sup> 1582.7098.

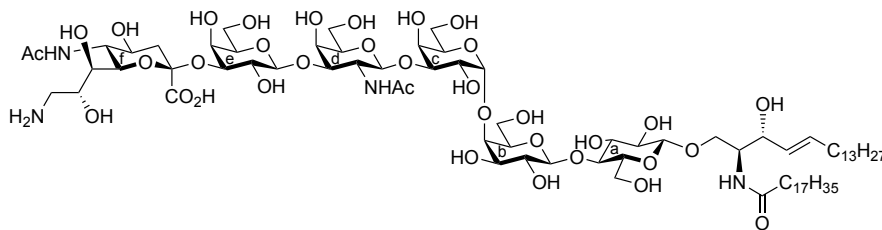

### Compound 38

To a solution of compound **37** (138 mg, 44.2  $\mu\text{mol}$ ) in MeOH/THF = 1/1 (15 mL) was added 1 M NaOH aq. (884  $\mu\text{L}$ , 0.884 mmol). After stirring for 48 h at ambient temperature as the progress of the reaction was monitored by TLC ( $\text{CHCl}_3/\text{MeOH}/5\%$  aq.  $\text{CaCl}_2$  = 5/4/1), 1 M NaOH aq. (442  $\mu\text{L}$ , 0.442 mmol) was added to complete the reaction. After stirring for another 45 h, the reaction mixture was neutralized with Muromac ( $\text{H}^+$ ), the resin was filtered through cotton, and washed with  $\text{CHCl}_3/\text{MeOH}$  = 1/1. The combined filtrate and washings were concentrated and co-evaporated with EtOH. The residue was purified by silica gel column chromatography ( $\text{CHCl}_3/\text{MeOH}/\text{H}_2\text{O}/28\%$   $\text{NH}_3$  aq. = 5/2/0.2/0  $\rightarrow$  5/5/0.5/0  $\rightarrow$  3/3/1/0.1) to give compound **38** (69.3 mg, 92%) as a white amorphous solid;  $[\alpha]_{\text{D}}^{20} +14.2^\circ$  (c 0.7,  $\text{CHCl}_3/\text{MeOH}$  = 1/1);  $^1\text{H}$  NMR (500 MHz,  $\text{CDCl}_3/\text{CD}_3\text{OD}$  = 1/1)  $\delta$  5.71 (near quin, 1 H,  $J_{5,6a} = J_{5,6b} = 7.0$  Hz,  $J_{4,5} = 15.2$  Hz, H-5<sup>Cer</sup>), 5.46 (dd, 1 H,  $J_{3,4} = 7.8$  Hz, H-4<sup>Cer</sup>), 4.99 (d, 1 H,  $J_{1,2} = 3.5$  Hz, H-1<sup>c</sup>), 4.94–2.88 (m, 46 H, H-1<sup>a</sup>, H-2<sup>a</sup>, H-3<sup>a</sup>, H-4<sup>a</sup>, H-5<sup>a</sup>, H-6a<sup>a</sup>, H-6b<sup>a</sup>, H-1<sup>b</sup>, H-2<sup>b</sup>, H-3<sup>b</sup>, H-4<sup>b</sup>, H-5<sup>b</sup>, H-6a<sup>b</sup>, H-6b<sup>b</sup>, H-2<sup>c</sup>, H-3<sup>c</sup>, H-4<sup>c</sup>, H-5<sup>c</sup>, H-6a<sup>c</sup>, H-6b<sup>c</sup>, H-1<sup>d</sup>, H-2<sup>d</sup>, H-3<sup>d</sup>, H-4<sup>d</sup>, H-5<sup>d</sup>, H-6a<sup>d</sup>, H-6b<sup>d</sup>, H-1<sup>e</sup>, H-2<sup>e</sup>, H-3<sup>e</sup>, H-4<sup>e</sup>, H-5<sup>e</sup>, H-6a<sup>e</sup>, H-6b<sup>e</sup>, H-3eq<sup>f</sup>, H-4<sup>f</sup>, H-5<sup>f</sup>, H-6<sup>f</sup>, H-7<sup>f</sup>, H-8<sup>f</sup>, H-9a<sup>f</sup>, H-9b<sup>f</sup>, H-1a<sup>Cer</sup>, H-1b<sup>Cer</sup>, H-2<sup>Cer</sup>, H-3<sup>Cer</sup>), 2.19–2.16 (m, 2 H,  $\text{NHC}(=\text{O})\text{CH}_2$ ), 2.04–2.00 (m, 5 H, H-6a<sup>Cer</sup>, H-6b<sup>Cer</sup>, 2 Ac), 1.73 (t, 1 H,  $J_{\text{gem}} = 11.3$  Hz, H-3ax<sup>f</sup>), 1.59 (m, 2 H,  $\text{NHC}(=\text{O})\text{CH}_2\text{CH}_2$ ), 1.38–1.28 (m, 50 H, 25  $\text{CH}_2^{\text{Cer}}$ ), 0.90–0.88 (m, 6 H, 2  $\text{Me}^{\text{Cer}}$ );  $^{13}\text{C}$  NMR (200 MHz,  $\text{CDCl}_3/\text{CD}_3\text{OD}$  = 1/1)  $\delta$  175.3, 175.1, 174.6, 135.0, 130.0, 104.1, 103.6, 102.7, 77.1, 76.3, 75.7, 75.6, 75.1, 75.0, 74.0, 73.8, 72.5, 71.8, 71.4, 69.4, 69.2, 69.1, 68.8, 68.7, 68.5, 68.1, 67.9, 62.2, 61.0, 60.8, 54.2, 53.8, 53.1, 43.7, 41.5, 37.0, 32.9, 32.5, 30.2, 30.2, 30.2, 30.2, 30.1, 30.1, 29.9, 29.9, 29.9, 29.8, 26.6, 23.6, 23.2, 22.5, 14.3; HRMS (ESI)  $m/z$ : found  $[\text{M}-\text{H}]^-$  1705.9382,  $\text{C}_{79}\text{H}_{142}\text{N}_4\text{O}_{35}$  calcd for  $[\text{M}-\text{H}]^-$  1705.9382.

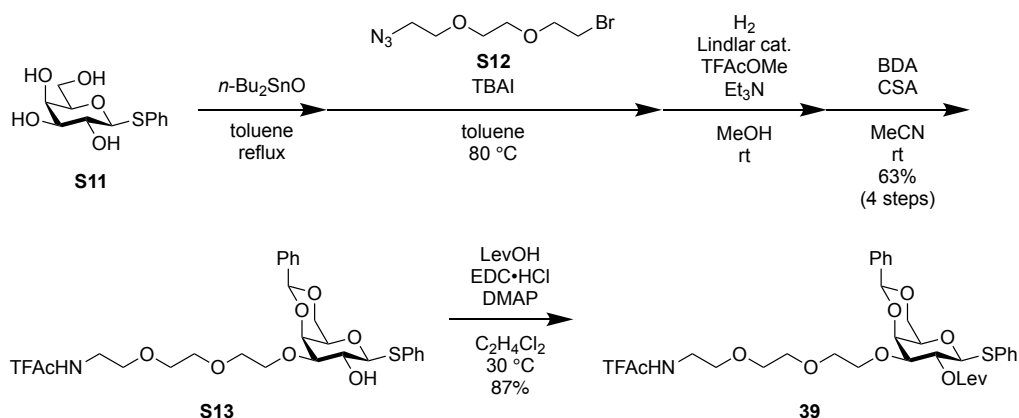

**Supporting Scheme 4. Synthesis of Gal donor 39.**

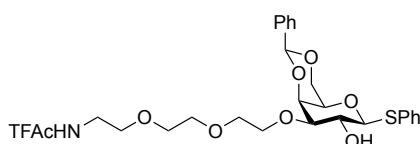

### Compound S13

To a solution of compound **S11**<sup>S06</sup> (300 mg, 1.10 mmol) in MeOH (11 mL) were added *n*-Bu<sub>2</sub>SnO (411 mg, 1.65 mmol) and Drierite (599 mg). After stirring for 7.5 h under reflux, the reaction mixture was cooled to ambient temperature and filtered through a pad of Celite. The pad was washed with MeOH. The combined filtrate and washings were concentrated, and dried for 12 h. The residue was dissolved in 1,4-dioxane (11 mL), followed by the addition of compound **S12**<sup>S07</sup> (786 mg, 3.30 mmol) and TBAI (1.22 g, 3.30 mmol). After stirring for 89 h at 80 °C as the progress of the reaction was monitored by TLC (CHCl<sub>3</sub>/MeOH = 10/1), the reaction was quenched with MeOH and the mixture was concentrated. The residue was purified by silica gel column chromatography (CHCl<sub>3</sub>/MeOH = 30/1). The resulting mixture was dried for 2 h, dissolved in MeOH (37 mL), followed by the addition of Et<sub>3</sub>N (1.52 mL, 11.0 mL), TFAcOMe (546 μL, 5.50 mL) and Pd(OH)<sub>2</sub>-C (77.2 mg, 20% on carbon). After stirring for 4 h at ambient temperature under H<sub>2</sub> gas as the progress of the reaction was monitored by TLC (CHCl<sub>3</sub>/MeOH = 10/1), the reaction mixture was filtered through a pad of Celite, the pad was washed with MeOH, the combined filtrate and washings were concentrated, and dried for 2 h. The residue was dissolved in MeCN (11 mL), followed by the addition of BDA (332 μL, 2.20 mmol) and CSA (25.6 mg, 0.110 mmol). After stirring for 50 min at ambient temperature as the progress of the reaction was monitored by TLC (CHCl<sub>3</sub>/MeOH = 20/1), the reaction was quenched with Et<sub>3</sub>N at 0 °C and the mixture was concentrated. The residue was purified by silica gel column chromatography (CHCl<sub>3</sub>/MeOH = 100/1) to give compound **S13** (404 mg, 63%) as a white amorphous solid; [α]<sub>D</sub> −39.7° (c 1.0, CHCl<sub>3</sub>); <sup>1</sup>H NMR (500 MHz, CDCl<sub>3</sub>) δ 8.10 (br s, 1 H, CF<sub>3</sub>C(=O)NH), 7.67–7.23 (m, 10 H, 2 Ph),



5.50 (s, 1 H, PhCH<), 4.56 (d, 1 H,  $J_{1,2} = 9.4$  Hz, H-1), 4.47 (br s, 1 H, OH-2), 4.38 (dd, 1 H,  $J_{5,6a} = 1.5$  Hz,  $J_{gem} = 12.5$  Hz, H-6a), 4.27 (d, 1 H,  $J_{3,4} = 3.0$  Hz, H-4), 4.04–4.00 (m, 2 H, H-6b, OCH<sub>2</sub>), 3.96 (br t, 1 H,  $J_{2,3} = 9.3$  Hz, H-2), 3.74–3.66 (m, 2 H, 2 OCH<sub>2</sub>), 3.65–3.45 (m, H-3, H-5, 7 OCH<sub>2</sub>), 3.40–3.29 (m, 2 H, 2 NHCH<sub>2</sub>); <sup>13</sup>C NMR (125 MHz, CDCl<sub>3</sub>) δ 157.5, 157.2, 137.8, 133.5, 131.5, 129.2, 129.0, 128.8, 128.2, 128.2, 127.8, 126.6, 125.3, 117.2, 114.9, 101.3, 86.4, 83.7, 74.5, 70.7, 70.4, 70.1, 70.1, 70.0, 69.5, 68.9, 67.2, 39.8; HRMS (ESI)  $m/z$ : found [M+Na]<sup>+</sup> 610.1690, C<sub>27</sub>H<sub>32</sub>F<sub>3</sub>NO<sub>8</sub>S calcd for [M+Na]<sup>+</sup> 610.1693.

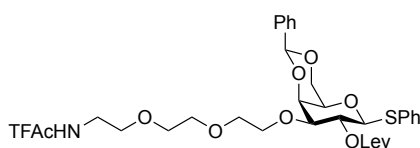

### Compound 39

To a solution of compound **513** (391 mg, 0.665 mmol) in C<sub>2</sub>H<sub>4</sub>Cl<sub>2</sub> (13 mL) were added DMAP (81.2 mg, 0.665 mmol), LevOH (102 μL, 0.998 mmol) and EDC·HCl (191 mg, 0.998 mmol). After stirring for 12.5 h at 30 °C as the progress of the reaction was monitored by TLC (toluene/acetone = 3/2, developed twice), the reaction mixture was diluted with EtOAc. The organic layer was washed with H<sub>2</sub>O and brine, dried over Na<sub>2</sub>SO<sub>4</sub>, and concentrated. The residue was purified by silica gel column chromatography (toluene/acetone = 4/1) to give compound **39** (398 mg, 87%) as a white amorphous solid; [α]<sub>D</sub> –3.8° (c 1.0, CHCl<sub>3</sub>); <sup>1</sup>H NMR (500 MHz, CDCl<sub>3</sub>) δ 7.61–7.14 (m, 11 H, 2 Ph, CF<sub>3</sub>C(=O)NH), 5.49 (s, 1 H, PhCH<), 5.25 (t, 1 H,  $J_{1,2} = J_{2,3} = 9.9$  Hz, H-2), 4.66 (d, 1 H, H-1), 4.38 (dd, 1 H,  $J_{5,6a} = 1.3$  Hz,  $J_{gem} = 12.2$  Hz, H-6a), 4.32 (d, 1 H,  $J_{3,4} = 3.0$  Hz, H-4), 4.04 (dd, 1 H,  $J_{5,6b} = 1.5$  Hz, H-6b), 3.76 (m, 1 H, OCH<sub>2</sub>), 3.65–3.56 (m, 6 H, H-3, 5 OCH<sub>2</sub>), 3.53–3.43 (m, 5 H, H-5, 4 OCH<sub>2</sub>), 3.38–3.25 (m, 2 H, 2 NHCH<sub>2</sub>), 2.87–2.59 (m, 4 H, 4 C(=O)CH<sub>2</sub>), 2.20 (s, 3 H, C(=O)Me); <sup>13</sup>C NMR (125 MHz, CDCl<sub>3</sub>) δ 206.5, 171.2, 157.3, 157.0, 137.6, 133.5, 131.6, 129.2, 128.7, 128.1, 128.0, 126.6, 117.1, 114.8, 101.3, 85.2, 79.8, 73.3, 70.6, 70.4, 70.3, 70.0, 69.7, 69.3, 68.6, 68.4, 39.6, 37.9, 29.9, 28.1; HRMS (ESI)  $m/z$ : found [M+Na]<sup>+</sup> 708.2064, C<sub>32</sub>H<sub>38</sub>F<sub>3</sub>NO<sub>10</sub>S calcd for [M+Na]<sup>+</sup> 708.2061.

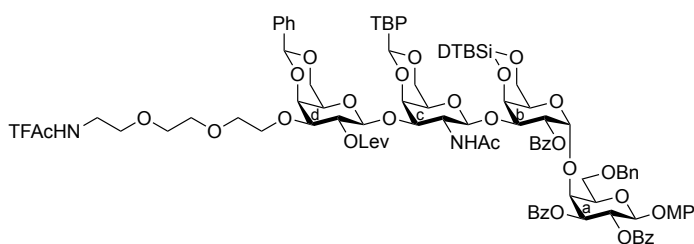

### Compound 40

To a solution of donor **39** (79.2 g, 0.116 mmol) and acceptor **10** (51.5 g, 38.5 mmol) in CH<sub>2</sub>Cl<sub>2</sub> (1.6 mL)

were added NIS (34.5 g, 0.154 mmol) and 4 Å molecular sieves (AW-300, 120 mg). After stirring for 1 h at ambient temperature, TfOH (1.0  $\mu$ L, 11.6 mmol) was added at 0 °C. After stirring for 4 h at 0 °C as the progress of the reaction was monitored by TLC (CHCl<sub>3</sub>/acetone = 4/1, developed twice), the reaction mixture was neutralized with satd. aq. NaHCO<sub>3</sub> and filtered through a pad of Celite. The pad was washed with CHCl<sub>3</sub>. The combined filtrate and washings were diluted with CHCl<sub>3</sub> and washed with satd. aq. Na<sub>2</sub>S<sub>2</sub>O<sub>3</sub> and brine. The organic layer was dried over Na<sub>2</sub>SO<sub>4</sub> and concentrated. The residue was purified by silica gel column chromatography (toluene/acetone = 5/1  $\rightarrow$  4/1  $\rightarrow$  2/1) to give compound **40** (53.2 g, 72%) as a white amorphous solid;  $[\alpha]_D^{+89.7^\circ}$  (c 1.0, CHCl<sub>3</sub>); <sup>1</sup>H NMR (500 MHz, CDCl<sub>3</sub>)  $\delta$  8.20–6.72 (m, 34 H, 7 Ar, CF<sub>3</sub>C(=O)NH), 6.55 (d, 1 H,  $J_{2,NH}$  = 6.5 Hz, NH-2<sup>c</sup>), 5.96 (dd, 1 H,  $J_{1,2}$  = 7.8 Hz,  $J_{2,3}$  = 10.7 Hz, H-2<sup>a</sup>), 5.69 (dd, 1 H,  $J_{1,2}$  = 3.8 Hz,  $J_{2,3}$  = 10.7 Hz, H-2<sup>b</sup>), 5.56 (s, 1 H, ArCH<), 5.48 (s, 1 H, PhCH<), 5.45 (d, 1 H,  $J_{1,2}$  = 8.0 Hz, H-1<sup>c</sup>), 5.33 (dd, 1 H,  $J_{3,4}$  = 2.8 Hz, H-3<sup>a</sup>), 5.24–5.20 (m, 2 H, H-1<sup>b</sup>, H-2<sup>d</sup>), 5.09 (d, 1 H, H-1<sup>a</sup>), 4.82–4.79 (m, 2 H, H-4<sup>b</sup>, H-3<sup>c</sup>), 4.56 (d, 1 H,  $J_{1,2}$  = 8.0 Hz, H-1<sup>d</sup>), 4.40 (m, 2 H, H-4<sup>a</sup>, H-4<sup>c</sup>), 4.36 (br d, 1 H,  $J_{gem}$  = 11.5 Hz, H-6a<sup>d</sup>), 4.31 (dd, 1 H,  $J_{3,4}$  = 2.5 Hz, H-3<sup>b</sup>), 4.27 (br d, 1 H,  $J_{gem}$  = 12.0 Hz, H-6a<sup>c</sup>), 4.23 (d, 1 H,  $J_{3,4}$  = 3.5 Hz, H-4<sup>d</sup>), 4.11–4.04 (m, 5 H, H-5<sup>b</sup>, H-6b<sup>c</sup>, H-6b<sup>d</sup>, 2 PhCH<sub>2</sub>), 3.90 (t, 1 H,  $J_{5,6a} = J_{5,6b} = 6.5$  Hz, H-5<sup>a</sup>), 3.77–3.69 (m, 4 H, OMe, OCH<sub>2</sub>), 3.64–3.31 (m, 18 H, H-6a<sup>a</sup>, H-6b<sup>a</sup>, H-6a<sup>b</sup>, H-6b<sup>b</sup>, H-2<sup>c</sup>, H-5<sup>c</sup>, H-3<sup>d</sup>, H-5<sup>d</sup>, 9 OCH<sub>2</sub>, NHCH<sub>2</sub>), 3.22 (m, 1 H, NHCH<sub>2</sub>), 2.85 (m, 1 H, C(=O)CH<sub>2</sub>), 2.54–2.45 (m, 2 H, 2 C(=O)CH<sub>2</sub>), 2.38 (m, 1 H, C(=O)CH<sub>2</sub>), 2.11 (s, 3 H, C(=O)Me), 1.32–1.31 (m, 12 H, Ac, <sup>t</sup>Bu), 1.03 (s, 9 H, <sup>t</sup>Bu), 0.95 (s, 9 H, <sup>t</sup>Bu); <sup>13</sup>C NMR (125 MHz, CDCl<sub>3</sub>)  $\delta$  207.3, 171.2, 171.0, 166.2, 165.9, 165.5, 157.3, 157.0, 155.6, 151.3, 151.2, 137.7, 137.6, 135.6, 133.6, 133.2, 133.2, 130.5, 129.9, 129.8, 129.7, 129.4, 129.1, 128.9, 128.7, 128.5, 128.4, 128.4, 128.2, 127.8, 127.7, 126.5, 126.3, 124.7, 119.0, 117.1, 114.8, 114.4, 101.7, 101.3, 101.2, 100.7, 100.0, 98.1, 78.5, 76.3, 75.2, 74.3, 74.2, 74.0, 73.8, 73.6, 73.3, 73.2, 70.8, 70.6, 70.5, 70.4, 69.7, 69.6, 69.4, 69.3, 68.4, 68.2, 68.0, 66.7, 66.4, 66.2, 55.6, 54.9, 39.6, 37.6, 34.6, 31.4, 29.9, 29.7, 27.8, 27.5, 27.4, 27.2, 23.3, 23.0, 22.7, 20.6; HRMS (ESI)  $m/z$ : found  $[M+Na]^+$  1935.7461, C<sub>100</sub>H<sub>119</sub>F<sub>3</sub>N<sub>2</sub>O<sub>30</sub>Si calcd for  $[M+Na]^+$  1935.7461.

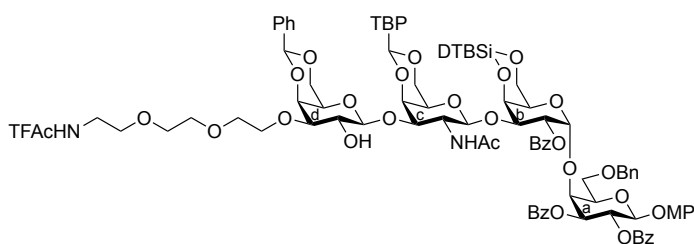

## Compound 41

To a solution of compound **40** (66.3 mg, 34.6  $\mu$ mol) in MeOH/THF = 1/5 (1.7 mL) was added  $\text{N}_2\text{H}_4\cdot\text{AcOH}$  (31.9 mg, 0.346 mmol). After stirring for 40 min at ambient temperature as the progress of the reaction was monitored by TLC (toluene/acetone = 3/2), the reaction mixture was diluted with EtOAc. The organic layer was washed with satd. aq.  $\text{NaHCO}_3$  and brine, dried over  $\text{Na}_2\text{SO}_4$ , and concentrated. The residue was purified by silica gel column chromatography (toluene/acetone = 2/1) to give compound **41** (58.9 mg, 94%) as a white amorphous solid;  $[\alpha]_D^{+25} +74.8^\circ$  (c 1.0,  $\text{CHCl}_3$ );  $^1\text{H}$  NMR (500 MHz,  $\text{CDCl}_3$ )  $\delta$  8.19–6.72 (m, 34 H, 7 Ar,  $\text{CF}_3\text{C}(=\text{O})\text{NH}$ ), 5.97 (dd, 1 H,  $J_{1,2} = 7.7$  Hz,  $J_{2,3} = 10.9$  Hz, H-2<sup>a</sup>), 5.72–5.69 (m, 2 H, H-2<sup>b</sup>, NH-2<sup>c</sup>), 5.55 (s, 1 H, ArCH<), 5.48 (s, 1 H, PhCH<), 5.36 (d, 1 H,  $J_{1,2} = 8.0$  Hz, H-1<sup>c</sup>), 5.33 (dd, 1 H,  $J_{3,4} = 3.0$  Hz, H-3<sup>a</sup>), 5.20 (d, 1 H,  $J_{1,2} = 3.5$  Hz, H-1<sup>b</sup>), 5.10 (d, 1 H, H-1<sup>a</sup>), 4.81–4.79 (m, 2 H, H-4<sup>b</sup>, H-3<sup>c</sup>), 4.42–4.41 (m, 2 H, H-4<sup>a</sup>, H-4<sup>c</sup>), 4.36–4.34 (m, 2 H, H-1<sup>d</sup>, H-6<sup>d</sup>), 4.31–4.25 (m, 2 H, H-3<sup>b</sup>, H-6<sup>a</sup>), 4.18 (d, 1 H,  $J_{3,4} = 3.3$  Hz, H-4<sup>d</sup>), 4.12–4.03 (m, 5 H, H-5<sup>b</sup>, H-6<sup>b</sup>, H-6<sup>d</sup>, 2 PhCH<sub>2</sub>), 3.92–3.82 (m, 3 H, H-5<sup>a</sup>, H-2<sup>d</sup>, OCH<sub>2</sub>), 3.74–3.41 (m, 18 H, H-6<sup>a</sup>, H-6<sup>b</sup>, H-6<sup>c</sup>, H-6<sup>d</sup>, H-2<sup>c</sup>, H-5<sup>d</sup>, OMe, 9 OCH<sub>2</sub>), 3.36 (br s, 1 H, H-5<sup>c</sup>), 3.32 (dd, 1 H,  $J_{2,3} = 9.5$  Hz, H-3<sup>d</sup>), 3.26 (m, 1 H, NHCH<sub>2</sub>), 3.10 (m, 1 H, NHCH<sub>2</sub>), 2.43 (m, 1 H, OH-2<sup>d</sup>), 1.30 (s, 9 H, <sup>t</sup>Bu), 1.19 (s, 3 H, Ac), 1.04 (s, 9 H, <sup>t</sup>Bu), 0.98 (s, 9 H, <sup>t</sup>Bu);  $^{13}\text{C}$  NMR (125 MHz,  $\text{CDCl}_3$ )  $\delta$  171.4, 166.0, 165.7, 165.4, 157.5, 157.2, 156.9, 156.6, 155.5, 151.5, 151.1, 137.8, 137.7, 137.4, 135.3, 133.5, 133.2, 133.2, 130.3, 129.7, 129.5, 129.4, 129.2, 128.9, 128.8, 128.6, 128.5, 128.3, 128.2, 128.1, 128.1, 127.7, 126.4, 126.3, 125.2, 124.7, 124.4, 118.9, 117.0, 114.7, 114.3, 104.0, 101.0, 100.3, 98.0, 80.5, 77.3, 77.2, 77.0, 76.7, 76.1, 75.8, 74.2, 74.0, 73.9, 73.8, 73.7, 73.5, 73.1, 70.5, 70.2, 70.1, 69.9, 69.6, 69.5, 69.4, 69.2, 69.2, 68.1, 68.0, 67.8, 66.5, 66.3, 55.5, 54.9, 39.4, 34.4, 31.6, 31.2, 27.4, 27.3, 23.3, 22.7, 21.3, 20.5; HRMS (ESI)  $m/z$ : found  $[\text{M}+\text{Na}]^+$  1837.7094,  $\text{C}_{95}\text{H}_{113}\text{F}_3\text{N}_2\text{O}_{28}\text{Si}$  calcd for  $[\text{M}+\text{Na}]^+$  1837.7093.

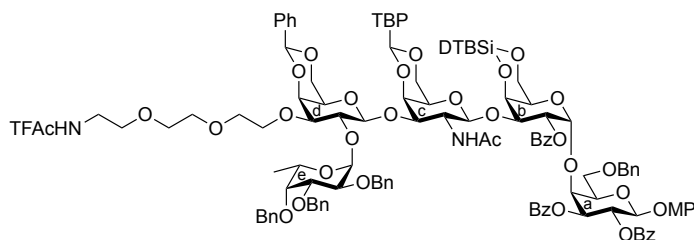

### Compound 43

To a solution of donor **42**<sup>S08</sup> (186 mg, 0.354 mmol) and acceptor **41** (428 mg, 0.236 mmol) in  $\text{CH}_2\text{Cl}_2/\text{CPME}$  = 1/1 (5.9 mL) were added NIS (95.0 mg, 0.424 mmol) and 4 Å molecular sieves (600 mg). After stirring for 1 h at ambient temperature, TfOH (2.1  $\mu$ L, 23.6  $\mu$ mol) was added at 0 °C. After stirring for 29 h at 0 °C as the progress of the reaction was monitored by TLC (toluene/acetone = 3/1), the reaction mixture was neutralized with satd. aq.  $\text{NaHCO}_3$  and filtered through a pad of Celite. The

pad was washed with  $\text{CHCl}_3$ . The combined filtrate and washings were diluted with  $\text{CHCl}_3$  and washed with satd. aq.  $\text{Na}_2\text{S}_2\text{O}_3$  and brine. The organic layer was dried over  $\text{Na}_2\text{SO}_4$  and concentrated. The residue was purified by gel filtration ( $\text{LH20}$ ;  $\text{CHCl}_3/\text{MeOH} = 1/1$ ), then silica gel column chromatography (toluene/acetone =  $7/1 \rightarrow 4/1$ ) to give compound **43** (430 mg, 82%) as a white amorphous solid;  $[\alpha]_D +64.0^\circ$  (c 1.0,  $\text{CHCl}_3$ );  $^1\text{H}$  NMR (500 MHz,  $\text{CDCl}_3$ )  $\delta$  8.22–6.72 (m, 49 H, 10 Ar,  $\text{CF}_3\text{C(=O)NH}$ ), 5.95 (dd, 1 H,  $J_{1,2} = 7.7$  Hz,  $J_{2,3} = 10.7$  Hz, H-2<sup>a</sup>), 5.86 (dd, 1 H,  $J_{1,2} = 3.7$  Hz,  $J_{2,3} = 10.8$  Hz, H-2<sup>b</sup>), 5.74 (d, 1 H,  $J_{1,2} = 3.5$  Hz, H-1<sup>e</sup>), 5.54 (s, 1 H, ArCH<), 5.46 (s, 1 H, PhCH<), 5.37 (d, 1 H,  $J_{1,2} = 8.0$  Hz, H-1<sup>c</sup>), 5.32 (dd, 1 H,  $J_{3,4} = 2.8$  Hz, H-3<sup>a</sup>), 5.25 (d, 1 H, H-1<sup>b</sup>), 5.09 (d, 1 H, H-1<sup>a</sup>), 4.91 (d, 1 H,  $J_{2,\text{NH}} = 7.0$  Hz, NH-2<sup>c</sup>), 4.89–4.86 (m, 2 H, H-4<sup>b</sup>, PhCH<sub>2</sub>), 4.83 (dd, 1 H,  $J_{2,3} = 3.3$  Hz,  $J_{3,4} = 11.3$  Hz, H-3<sup>c</sup>), 4.78 (d, 1 H,  $J_{\text{gem}} = 13.0$  Hz, PhCH<sub>2</sub>), 4.68 (d, 1 H,  $J_{\text{gem}} = 12.0$  Hz, PhCH<sub>2</sub>), 4.60–4.55 (m, 2 H, 2 PhCH<sub>2</sub>), 4.44 (d, 1 H, H-4<sup>a</sup>), 4.33–4.31 (m, 4 H, H-3<sup>b</sup>, H-4<sup>c</sup>, 2 PhCH<sub>2</sub>), 4.27 (br d, 1 H,  $J_{\text{gem}} = 12.0$  Hz, H-6a<sup>d</sup>), 4.21 (d, 1 H,  $J_{1,2} = 8.0$  Hz, H-1<sup>d</sup>), 4.15–4.11 (m, 4 H, H-5<sup>b</sup>, H-6a<sup>c</sup>, H-4<sup>d</sup>, H-5<sup>e</sup>), 4.08–4.06 (m, 2 H, H-6b<sup>d</sup>, PhCH<sub>2</sub>), 4.00 (br d, 1 H, H-6b<sup>c</sup>), 3.97–3.89 (m, 3 H, H-5<sup>a</sup>, H-2<sup>d</sup>, H-2<sup>e</sup>), 3.75 (s, 3 H, OMe), 3.66–3.18 (m, 20 H, H-6a<sup>a</sup>, H-6b<sup>a</sup>, H-6a<sup>b</sup>, H-6b<sup>b</sup>, H-2<sup>c</sup>, H-5<sup>c</sup>, H-3<sup>d</sup>, H-5<sup>d</sup>, H-3<sup>e</sup>, H-4<sup>e</sup>, 10 OCH<sub>2</sub>), 3.09–3.05 (m, 2 H, 2 NHCH<sub>2</sub>), 1.30 (s, 9 H, <sup>t</sup>Bu), 1.04 (s, 9 H, <sup>t</sup>Bu), 1.00 (s, 9 H, <sup>t</sup>Bu), 0.85 (s, 3 H, Ac), 0.55 (d, 3 H,  $J_{5,6} = 6.5$  Hz, H-6<sup>e</sup>);  $^{13}\text{C}$  NMR (125 MHz,  $\text{CDCl}_3$ )  $\delta$  171.2, 166.2, 165.9, 165.5, 157.7, 157.4, 155.6, 152.0, 151.3, 139.6, 138.7, 138.6, 137.8, 137.5, 136.1, 133.7, 133.3, 133.3, 130.5, 129.8, 129.7, 129.6, 129.4, 129.0, 128.9, 128.8, 128.7, 128.5, 128.4, 128.4, 128.2, 128.1, 127.9, 127.8, 127.8, 127.7, 127.5, 127.1, 126.9, 126.7, 126.1, 124.8, 119.1, 117.1, 114.8, 114.4, 101.2, 101.1, 101.1, 100.6, 100.5, 97.9, 95.1, 82.2, 77.9, 76.1, 75.8, 75.7, 75.5, 74.4, 74.1, 73.7, 73.6, 73.2, 72.2, 71.0, 70.8, 70.5, 70.1, 70.0, 69.8, 69.7, 69.4, 69.2, 68.1, 67.9, 66.7, 66.5, 66.2, 55.7, 55.6, 39.6, 34.6, 31.4, 29.7, 27.6, 27.4, 23.5, 22.6, 20.6, 15.4; HRMS (ESI)  $m/z$ : found  $[\text{M}+\text{Na}]^+$  2253.9080,  $\text{C}_{122}\text{H}_{141}\text{F}_3\text{N}_2\text{O}_{32}\text{Si}$  calcd for  $[\text{M}+\text{Na}]^+$  2253.9081.

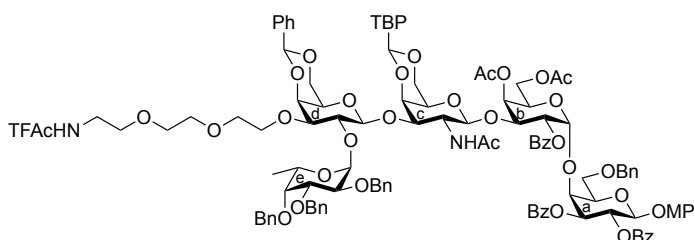

#### Compound 44

To a solution of compound **43** (426 mg, 0.191 mmol) in THF (3.8 mL) was added 1 M TBAHF in THF (1.91 mL, 1.91 mmol). After stirring for 13 h at ambient temperature as the progress of the reaction was monitored by TLC ( $n$ -hexane/acetone =  $1/1$ ), the reaction mixture was diluted with EtOAc and washed with 2 M HCl,  $\text{H}_2\text{O}$ , satd. aq.  $\text{NaHCO}_3$  and brine. The organic layer was dried over  $\text{Na}_2\text{SO}_4$ ,

concentrated and dried for 2 h. The residue was dissolved in pyridine (1.9 mL), followed by the addition of Ac<sub>2</sub>O (72.4  $\mu$ L, 0.764 mmol) and DMAP (2.3 mg, 19.1  $\mu$ mol) at 0 °C. After stirring for 2 h at ambient temperature as the progress of the reaction was monitored by TLC (*n*-hexane/acetone = 1/1), Ac<sub>2</sub>O (72.4  $\mu$ L, 0.764 mmol) was added to complete the reaction. After stirring for another 2 h, the reaction was quenched with MeOH at 0 °C and diluted with EtOAc. The organic layer was washed with 2 M HCl, H<sub>2</sub>O, satd. aq. NaHCO<sub>3</sub> and brine, dried over Na<sub>2</sub>SO<sub>4</sub>, and concentrated. The residue was purified by silica gel column chromatography (*n*-hexane/acetone = 2/1  $\rightarrow$  3/2) to give compound **44** (386 mg, 93%) as a white amorphous solid;  $[\alpha]_D^{+25} +69.5^\circ$  (c 1.0, CHCl<sub>3</sub>); <sup>1</sup>H NMR (500 MHz, CDCl<sub>3</sub>)  $\delta$  8.12–6.72 (m, 49 H, 10 Ar, CF<sub>3</sub>C(=O)NH), 6.07 (dd, 1 H,  $J_{1,2} = 7.5$  Hz,  $J_{2,3} = 10.7$  Hz, H-2<sup>a</sup>), 5.73 (d, 1 H,  $J_{1,2} = 3.5$  Hz, H-1<sup>e</sup>), 5.65–5.61 (m, 2 H, H-2<sup>b</sup>, NH-2<sup>c</sup>), 5.53 (d, 1 H,  $J_{3,4} = 3.0$  Hz, H-4<sup>b</sup>), 5.49 (s, 1 H, ArCH<), 5.47 (s, 1 H, PhCH<), 5.41 (d, 1 H,  $J_{1,2} = 8.5$  Hz, H-1<sup>c</sup>), 5.38 (dd, 1 H,  $J_{3,4} = 2.8$  Hz, H-3<sup>a</sup>), 5.25 (d, 1 H,  $J_{1,2} = 3.5$  Hz, H-1<sup>b</sup>), 5.09 (d, 1 H, H-1<sup>a</sup>), 4.81 (d, 1 H,  $J_{gem} = 10.5$  Hz, PhCH<sub>2</sub>), 4.96 (d, 1 H,  $J_{gem} = 11.5$  Hz, PhCH<sub>2</sub>), 4.64–4.56 (m, 3 H, H-3<sup>b</sup>, 2 PhCH<sub>2</sub>), 4.54 (t, 1 H,  $J_{5,6a} = J_{5,6b} = 6.8$  Hz, H-5<sup>b</sup>), 4.51–4.49 (m, 2 H, H-4<sup>a</sup>, H-3<sup>c</sup>), 4.41 (d, 1 H,  $J_{1,2} = 8.0$  Hz, H-1<sup>d</sup>), 4.36–4.33 (m, 2 H, H-6a<sup>d</sup>, PhCH<sub>2</sub>), 4.30 (d, 1 H,  $J_{3,4} = 3.0$  Hz, H-4<sup>c</sup>), 4.28–4.24 (m, 3 H, H-6a<sup>c</sup>, 2 PhCH<sub>2</sub>), 4.19 (d, 1 H,  $J_{3,4} = 3.5$  Hz, H-4<sup>d</sup>), 4.11 (d, 1 H,  $J_{gem} = 11.5$  Hz, PhCH<sub>2</sub>), 4.06–3.90 (m, 6 H, H-5<sup>a</sup>, H-6b<sup>c</sup>, H-2<sup>d</sup>, H-6b<sup>d</sup>, H-2<sup>e</sup>, H-5<sup>e</sup>), 3.75 (s, 3 H, OMe), 3.67 (m, 1 H, OCH<sub>2</sub>), 3.56–3.18 (m, 19 H, H-6a<sup>a</sup>, H-6b<sup>a</sup>, H-6a<sup>b</sup>, H-6b<sup>b</sup>, H-2<sup>c</sup>, H-5<sup>c</sup>, H-3<sup>d</sup>, H-5<sup>d</sup>, H-3<sup>e</sup>, H-4<sup>e</sup>, 9 OCH<sub>2</sub>), 3.08–3.05 (m, 2 H, 2 NHCH<sub>2</sub>), 2.09 (s, 3 H, Ac), 1.81 (s, 3 H, Ac), 1.42 (s, 3 H, Ac), 1.25 (s, 9 H, <sup>t</sup>Bu), 0.52 (d, 3 H,  $J_{5,6} = 6.5$  Hz, H-6<sup>e</sup>); <sup>13</sup>C NMR (125 MHz, CDCl<sub>3</sub>)  $\delta$  171.1, 170.1, 170.1, 165.9, 165.9, 165.5, 157.6, 157.4, 155.6, 151.8, 151.4, 139.3, 138.9, 138.8, 137.7, 137.4, 135.8, 133.7, 133.3, 130.3, 129.7, 129.7, 129.6, 129.4, 128.9, 128.8, 128.7, 128.5, 128.4, 128.4, 128.1, 128.1, 128.1, 128.0, 127.9, 127.8, 127.7, 127.5, 127.2, 126.5, 126.1, 124.8, 119.1, 117.0, 114.8, 114.4, 101.8, 101.3, 101.1, 100.7, 99.6, 96.7, 95.5, 82.1, 79.0, 78.8, 76.2, 75.6, 75.4, 73.8, 73.7, 73.5, 73.2, 72.8, 72.5, 72.2, 71.9, 70.2, 70.0, 69.9, 69.8, 69.6, 69.3, 68.8, 68.1, 68.0, 67.4, 67.3, 66.7, 66.4, 61.8, 55.6, 55.2, 39.6, 34.6, 31.3, 29.3, 23.1, 21.0, 20.6, 15.3; HRMS (ESI) *m/z*: found [M+Na]<sup>+</sup> 2197.8274, C<sub>118</sub>H<sub>129</sub>F<sub>3</sub>N<sub>2</sub>O<sub>34</sub> calcd for [M+Na]<sup>+</sup> 2197.8271.

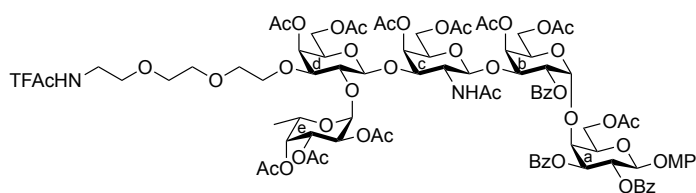

## Compound 45

To a solution of compound **44** (57.5 mg, 26.4  $\mu$ mol) in 1,4-dioxane/MeOH = 1/1 (1.3 mL) was added

Pd(OH)<sub>2</sub>-C (115 mg, 20% on carbon). After stirring for 5 h at ambient temperature under H<sub>2</sub> gas as the progress of the reaction was monitored by TLC (CHCl<sub>3</sub>/MeOH =5/1), the reaction mixture was filtered through a pad of Celite, the pad was washed with CHCl<sub>3</sub>, the combined filtrate and washings were concentrated, co-evaporated with toluene, and dried for 2 h. The residue was dissolved in pyridine (0.26 mL), followed by the addition of Ac<sub>2</sub>O (30.0 μL, 0.317 mmol) and DMAP (0.3 mg, 2.64 μmol) at 0 °C. After stirring for 7 h at ambient temperature as the progress of the reaction was monitored by TLC (CHCl<sub>3</sub>/MeOH =20/1), the reaction was quenched with MeOH at 0 °C, and the mixture was co-evaporated with toluene, and diluted with CHCl<sub>3</sub>. The organic layer was washed with 2 M HCl, H<sub>2</sub>O, satd. aq. NaHCO<sub>3</sub> and brine, dried over Na<sub>2</sub>SO<sub>4</sub>, and concentrated. The residue was purified by silica gel column chromatography (*n*-hexane/acetone = 1/1) to give compound **45** (44.4 mg, 88%) as a white amorphous solid; [α]<sub>D</sub> +46.8° (c 1.0, CHCl<sub>3</sub>); <sup>1</sup>H NMR (500 MHz, CDCl<sub>3</sub>) δ 8.12–6.75 (m, 20 H, 4 Ar, CF<sub>3</sub>C(=O)NH), 6.50 (d, 1 H, *J*<sub>2,NH</sub> = 6.5 Hz, NH-2<sup>c</sup>), 5.94 (dd, 1 H, *J*<sub>1,2</sub> = 7.8 Hz, *J*<sub>2,3</sub> = 10.5 Hz, H-2<sup>a</sup>), 5.63 (d, 1 H, *J*<sub>1,2</sub> = 3.5 Hz, H-1<sup>e</sup>), 5.59 (d, 1 H, *J*<sub>3,4</sub> = 2.0 Hz, H-4<sup>b</sup>), 5.51 (dd, 1 H, *J*<sub>1,2</sub> = 3.5 Hz, *J*<sub>2,3</sub> = 10.5 Hz, H-2<sup>b</sup>), 5.39 (d, 1 H, *J*<sub>3,4</sub> = 3.0 Hz, H-4<sup>c</sup>), 5.36–5.32 (m, 2 H, H-3<sup>a</sup>, H-4<sup>d</sup>), 5.27 (d, 1 H, H-1<sup>b</sup>), 5.22 (d, 1 H, *J*<sub>1,2</sub> = 8.0 Hz, H-1<sup>c</sup>), 5.20–5.19 (m, 2 H, H-3<sup>e</sup>, H-4<sup>e</sup>), 5.13 (m, 1 H, H-2<sup>e</sup>), 5.11 (d, 1 H, H-1<sup>a</sup>), 5.01 (dd, 1 H, *J*<sub>2,3</sub> = 11.0 Hz, H-3<sup>c</sup>), 4.60–4.56 (m, 2 H, H-3<sup>b</sup>, H-5<sup>c</sup>), 4.50–4.44 (m, 2 H, H-6a<sup>b</sup>, H-5<sup>e</sup>), 4.40 (d, 1 H, *J*<sub>1,2</sub> = 8.0 Hz, H-1<sup>d</sup>), 4.34 (d, 1 H, *J*<sub>3,4</sub> = 2.8 Hz, H-4<sup>a</sup>), 4.25 (dd, 1 H, *J*<sub>5,6a</sub> = 5.3 Hz, *J*<sub>gem</sub> = 11.3 Hz, H-6a<sup>a</sup>), 4.12–4.07 (m, 3 H, H-6b<sup>a</sup>, H-6a<sup>d</sup>, H-6b<sup>d</sup>), 4.03–3.95 (m, 3 H, H-5<sup>a</sup>, H-5<sup>b</sup>, H-6b<sup>b</sup>), 3.85 (dd, 1 H, *J*<sub>5,6a</sub> = 6.8 Hz, *J*<sub>gem</sub> = 11.3 Hz, H-6a<sup>c</sup>), 3.76–3.67 (m, 6 H, H-6b<sup>c</sup>, H-5<sup>d</sup>, OMe, OCH<sub>2</sub>), 3.63–3.33 (m, 13 H, H-2<sup>d</sup>, H-3<sup>d</sup>, 9 OCH<sub>2</sub>, 2 NHCH<sub>2</sub>), 3.02 (m, 1 H, H-2<sup>c</sup>), 2.14 (s, 6 H, 2 Ac), 2.12 (s, 3 H, Ac), 2.10 (s, 3 H, Ac), 2.09 (s, 3 H, Ac), 2.08 (s, 3 H, Ac), 1.94 (s, 3 H, Ac), 1.92 (s, 3 H, Ac), 1.90 (s, 3 H, Ac), 1.89 (s, 3 H, Ac), 1.38 (s, 3 H, Ac), 1.10 (d, 3 H, *J*<sub>5,6</sub> = 6.5 Hz, H-6<sup>e</sup>); <sup>13</sup>C NMR (125 MHz, CDCl<sub>3</sub>) δ 171.9, 171.3, 170.8, 170.6, 170.6, 170.5, 170.4, 170.1, 169.8, 169.6, 166.2, 166.0, 165.2, 157.5, 157.2, 155.7, 151.1, 133.7, 133.6, 133.4, 130.2, 129.9, 129.7, 129.2, 129.0, 128.7, 128.6, 128.6, 128.5, 118.7, 117.1, 114.8, 114.5, 101.8, 101.0, 99.0, 98.4, 95.1, 81.5, 74.8, 73.3, 73.2, 72.1, 71.6, 71.3, 71.1, 70.9, 70.8, 70.6, 70.4, 70.4, 70.2, 70.2, 70.1, 69.5, 69.4, 69.3, 68.7, 68.5, 67.9, 67.5, 66.1, 64.3, 62.5, 61.8, 61.6, 61.3, 56.1, 55.6, 53.8, 39.8, 31.7, 29.7, 29.3, 22.6, 20.8, 20.8, 20.7, 20.7, 20.7, 20.6, 20.6, 20.6, 20.5, 15.7; HRMS (ESI) *m/z*: found [M+Na]<sup>+</sup> 1941.5987, C<sub>93</sub>H<sub>109</sub>F<sub>3</sub>N<sub>2</sub>O<sub>41</sub> calcd for [M+Na]<sup>+</sup> 1941.5986.

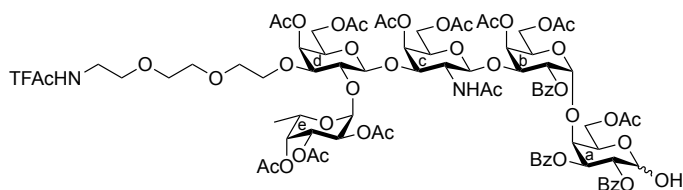

## Compound 46

To a solution of compound **45** (44.4 mg, 23.1  $\mu\text{mol}$ ) in MeCN/toluene/ $\text{H}_2\text{O}$  = 6/5/3 (0.46 mL) was added cerium (IV) ammonium nitrate (127 g, 0.231 mmol) at 0 °C. After stirring for 2 h at 0 °C as the progress of the reaction was monitored by TLC ( $\text{CHCl}_3/\text{MeOH}$  = 20/1), the reaction mixture was diluted with EtOAc. The organic layer was washed with  $\text{H}_2\text{O}$ , satd. aq.  $\text{NaHCO}_3$  and brine, dried over  $\text{Na}_2\text{SO}_4$ , and concentrated. The residue was purified by silica gel column chromatography ( $\text{CHCl}_3/\text{MeOH}$  = 60/1) to give compound **46** (27.4 mg, 65%,  $\alpha:\beta$  = 1:0.3) as a white amorphous solid;  $\alpha$  isomer;  $^1\text{H}$  NMR (500 MHz,  $\text{CDCl}_3$ )  $\delta$  8.11–7.33 (m, 16 H, 3 Ph,  $\text{CF}_3\text{C}(=\text{O})\text{NH}$ ), 6.50 (d, 1 H,  $J_{2,\text{NH}}$  = 6.0 Hz,  $\text{NH}-2^c$ ), 5.80 (dd, 1 H,  $J_{2,3}$  = 11.0 Hz,  $J_{3,4}$  = 2.5 Hz,  $\text{H}-3^a$ ), 5.70 (br t, 1 H,  $J_{1,2} = J_{1,\text{OH}}$  = 3.3 Hz,  $\text{H}-1^a$ ), 5.63 (d, 1 H,  $J_{1,2}$  = 3.4 Hz,  $\text{H}-1^e$ ), 5.61 (dd, 1 H,  $\text{H}-2^a$ ), 5.55 (d, 1 H,  $J_{3,4}$  = 3.5 Hz,  $\text{H}-4^b$ ), 5.49 (dd, 1 H,  $J_{1,2}$  = 3.5 Hz,  $J_{2,3}$  = 10.5 Hz,  $\text{H}-2^b$ ), 5.39 (d, 1 H,  $J_{3,4}$  = 3.5 Hz,  $\text{H}-4^c$ ), 5.33 (d, 1 H,  $J_{3,4}$  = 3.0 Hz,  $\text{H}-4^d$ ), 5.30 (d, 1 H,  $\text{H}-1^b$ ), 5.23 (d, 1 H,  $J_{1,2}$  = 8.0 Hz,  $\text{H}-1^c$ ), 5.22–5.18 (m, 2 H,  $\text{H}-3^e$ ,  $\text{H}-4^e$ ), 5.13 (dd, 1 H,  $J_{2,3}$  = 10.8 Hz,  $\text{H}-2^e$ ), 5.01 (dd, 1 H,  $J_{2,3}$  = 11.0 Hz,  $\text{H}-3^c$ ), 4.60–4.51 (m, 2 H,  $\text{H}-3^b$ ,  $\text{H}-5^c$ ), 4.49 (m, 1 H,  $\text{H}-5^e$ ), 4.41–4.37 (m, 2 H,  $\text{H}-6^a^b$ ,  $\text{H}-1^d$ ), 4.31 (d, 1 H,  $\text{H}-4^a$ ), 4.24 (dd, 1 H,  $J_{5,6a}$  = 5.3 Hz,  $J_{\text{gem}}$  = 11.3 Hz,  $\text{H}-6^a^a$ ), 4.12–3.99 (m, 6 H,  $\text{H}-5^a$ ,  $\text{H}-6^b^a$ ,  $\text{H}-5^b$ ,  $\text{H}-6^b^b$ ,  $\text{H}-6^a^d$ ,  $\text{H}-6^b^d$ ), 3.83 (m, 1 H,  $\text{H}-6^a^c$ ), 3.78–3.68 (m, 3 H,  $\text{H}-6^b^c$ ,  $\text{H}-5^d$ ,  $\text{OCH}_2$ ), 3.64–3.34 (m, 13 H,  $\text{H}-2^d$ ,  $\text{H}-3^d$ , 9  $\text{OCH}_2$ , 2  $\text{NHCH}_2$ ), 3.01 (m, 1 H,  $\text{H}-2^c$ ), 2.90 (d, 1 H,  $\text{OH}-1^a$ ), 2.15–2.08 (m, 18 H, 6 Ac), 1.94 (s, 3 H, Ac), 1.91 (s, 3 H, Ac), 1.89 (s, 3 H, Ac), 1.70 (s, 3 H, Ac), 1.38 (s, 3 H, Ac), 1.09 (d, 3 H,  $J_{5,6}$  = 6.5 Hz,  $\text{H}-6^e$ ); HRMS (ESI)  $m/z$ : found  $[\text{M}+\text{Na}]^+$  1835.5567,  $\text{C}_{81}\text{H}_{99}\text{F}_3\text{N}_2\text{O}_{41}$  calcd for  $[\text{M}+\text{Na}]^+$  1835.3368.

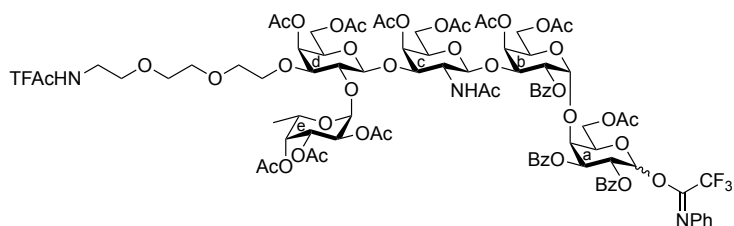

## Compound 47

To a solution of compound **46** (12.7 mg, 7.00  $\mu\text{mol}$ ) in acetone (0.14 mL) were added  $\text{CF}_3\text{C}(=\text{NPh})\text{Cl}$  (2.3  $\mu\text{L}$ , 14.0  $\mu\text{mol}$ ) and  $\text{K}_2\text{CO}_3$  (4.8 mg, 35.0  $\mu\text{mol}$ ). After stirring for 8 h at ambient temperature as the progress of the reaction was monitored by TLC ( $\text{CHCl}_3/\text{MeOH}$  = 20/1), the reaction mixture was concentrated. The residue was purified by silica gel column chromatography ( $\text{CHCl}_3/\text{MeOH}$  = 80/1) to give compound **47** (13.2 mg, 95%,  $\alpha:\beta$  = 1:0.3) as a white amorphous solid;  $\alpha$  isomer;  $^1\text{H}$  NMR (500 MHz,  $\text{CDCl}_3$ )  $\delta$  8.11–6.47 (m, 22 H, 4 Ph,  $\text{CF}_3\text{C}(=\text{O})\text{NH}$ ,  $\text{NH}-2^c$ ), 6.06 (br s, 1 H,  $\text{H}-1^a$ ), 5.89 (m, 1 H,  $\text{H}-2^a$ ), 5.78 (br dd, 1 H,  $J_{3,4}$  = 2.3 Hz,  $J_{2,3}$  = 10.8 Hz,  $\text{H}-3^a$ ), 5.64 (d, 1 H,  $J_{1,2}$  = 3.3 Hz,  $\text{H}-1^e$ ), 5.56 (d, 1 H,  $J_{3,4}$

= 2.5 Hz, H-4<sup>b</sup>), 5.49 (dd, 1 H,  $J_{1,2} = 3.5$  Hz,  $J_{2,3} = 10.5$  Hz, H-2<sup>b</sup>), 5.40 (d, 1 H,  $J_{3,4} = 3.2$  Hz, H-4<sup>c</sup>), 5.33–5.32 (m, 2 H, H-1<sup>b</sup>, H-4<sup>d</sup>), 5.25 (d, 1 H,  $J_{1,2} = 8.0$  Hz, H-1<sup>c</sup>), 5.22–5.19 (m, 2 H, H-3<sup>e</sup>, H-4<sup>e</sup>), 5.13 (dd, 1 H,  $J_{2,3} = 10.5$  Hz, H-2<sup>e</sup>), 5.03 (dd, 1 H,  $J_{2,3} = 11.3$  Hz, H-3<sup>c</sup>), 4.55–4.53 (m, 2 H, H-3<sup>b</sup>, H-5<sup>c</sup>), 4.48 (m, 1 H, H-5<sup>e</sup>), 4.42–4.39 (m, 2 H, H-4<sup>a</sup>, H-1<sup>d</sup>), 4.34 (m, 1 H, H-6<sup>b</sup>), 4.25 (dd, 1 H,  $J_{5,6a} = 5.5$  Hz,  $J_{gem} = 11.5$  Hz, H-6a<sup>a</sup>), 4.13–4.00 (m, 6 H, H-5<sup>a</sup>, H-6b<sup>a</sup>, H-5<sup>b</sup>, H-6b<sup>b</sup>, H-6a<sup>d</sup>, H-6b<sup>d</sup>), 3.84 (dd, 1 H,  $J_{5,6a} = 5.5$  Hz,  $J_{gem} = 11.5$  Hz, H-6a<sup>c</sup>), 3.79–3.69 (m, 3 H, H-6b<sup>c</sup>, H-5<sup>d</sup>, OCH<sub>2</sub>), 3.63–3.33 (m, 13 H, H-2<sup>d</sup>, H-3<sup>d</sup>, 9 OCH<sub>2</sub>, 2 NHCH<sub>2</sub>), 3.01 (m, 1 H, H-2<sup>c</sup>), 2.15–2.07 (m, 18 H, 6 Ac), 1.94 (s, 3 H, Ac), 1.93 (s, 3 H, Ac), 1.91 (s, 3 H, Ac), 1.75 (s, 3 H, Ac), 1.39 (s, 3 H, Ac), 1.10 (d, 3 H,  $J_{5,6} = 6.5$  Hz, H-6<sup>e</sup>); HRMS (ESI)  $m/z$ : found [M+Na]<sup>+</sup> 2006.5864, C<sub>89</sub>H<sub>103</sub>F<sub>6</sub>N<sub>3</sub>O<sub>41</sub> calcd for [M+Na]<sup>+</sup> 2006.5863.

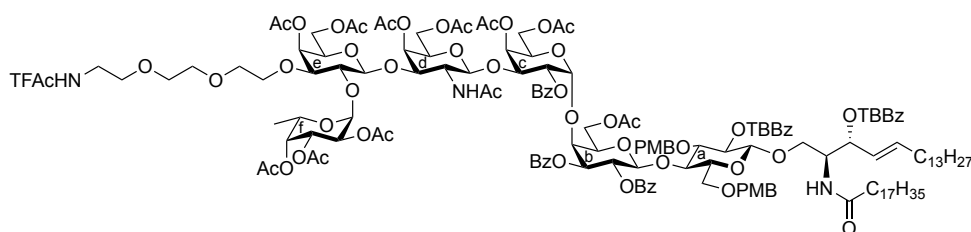

## Compound 48

To a solution of donor **47** (50.0 mg, 25.2  $\mu$ mol) and acceptor **17**<sup>S03</sup> (48.7 mg, 37.8  $\mu$ mol) in CH<sub>2</sub>Cl<sub>2</sub> (1.3 mL) was added 4 Å molecular sieves (AW-300, 130 mg). After stirring for 1 h at ambient temperature, TMSOTf (0.91  $\mu$ L, 5.04  $\mu$ mol) was added at 0 °C. After stirring for 16.5 h at 0 °C as the progress of the reaction was monitored by TLC (toluene/acetone = 3/1), the reaction mixture was neutralized with satd. aq. NaHCO<sub>3</sub> and filtered through a pad of Celite. The pad was washed with CHCl<sub>3</sub>. The combined filtrate and washings were diluted with CHCl<sub>3</sub> and washed with brine. The organic layer was dried over Na<sub>2</sub>SO<sub>4</sub> and concentrated. The residue was purified by silica gel column chromatography (toluene/acetone = 10/1 → 4/1) to give compound **48** (58.6 mg, 75%) as a white amorphous solid;  $[\alpha]_D^{+31.1^\circ}$  (c 1.0, CHCl<sub>3</sub>); <sup>1</sup>H NMR (500 MHz, CDCl<sub>3</sub>)  $\delta$  8.05–6.67 (m, 32 H, 7 Ar, CF<sub>3</sub>C(=O)NH), 6.40 (d, 1 H,  $J_{2,NH} = 7.0$  Hz, NH-2<sup>d</sup>), 5.77 (near quin, 1 H,  $J_{5,6a} = J_{5,6b} = 6.8$  Hz,  $J_{4,5} = 15.0$  Hz, H-5<sup>Cer</sup>), 5.68 (dd, 1 H,  $J_{1,2} = 8.0$  Hz,  $J_{2,3} = 10.5$  Hz, H-2<sup>b</sup>), 5.63 (d, 1 H,  $J_{2,NH} = 9.5$  Hz, NH-2<sup>Cer</sup>), 5.60 (d, 1 H,  $J_{1,2} = 3.5$  Hz, H-1<sup>f</sup>), 5.48–5.36 (m, 4 H, H-2<sup>c</sup>, H-4<sup>c</sup>, H-3<sup>Cer</sup>, H-4<sup>Cer</sup>), 5.31 (d, 1 H,  $J_{3,4} = 2.5$  Hz, H-4<sup>e</sup>), 5.26–5.24 (m, 2 H, H-1<sup>c</sup>, H-4<sup>d</sup>), 5.16–5.09 (m, 5 H, H-2<sup>a</sup>, H-3<sup>b</sup>, H-2<sup>f</sup>, H-3<sup>f</sup>, H-4<sup>f</sup>), 5.01 (d, 1 H,  $J_{1,2} = 8.0$  Hz, H-1<sup>d</sup>), 4.91 (d, 1 H, H-1<sup>b</sup>), 4.84 (dd, 1 H,  $J_{3,4} = 3.3$  Hz,  $J_{2,3} = 11.3$  Hz, H-3<sup>d</sup>), 4.68 (d, 1 H,  $J_{gem} = 11.5$  Hz, ArCH<sub>2</sub>), 4.61 (d, 1 H, ArCH<sub>2</sub>), 4.50 (near t, 1 H, H-5<sup>d</sup>), 4.45–4.41 (m, 3 H, H-3<sup>c</sup>, H-5<sup>f</sup>, ArCH<sub>2</sub>), 4.36–4.30 (m, 4 H, H-1<sup>a</sup>, H-1<sup>e</sup>, H-6a<sup>e</sup>, H-2<sup>Cer</sup>), 4.23 (d, 1 H,  $J_{3,4} = 2.5$  Hz, H-4<sup>b</sup>), 4.14–4.05 (m, 5 H, H-4<sup>a</sup>, H-6a<sup>b</sup>, H-5<sup>e</sup>, H-6b<sup>e</sup>, ArCH<sub>2</sub>), 4.02–3.97 (m, 2 H, H-6a<sup>c</sup>, H-1a<sup>Cer</sup>), 3.85–3.80 (m, 2 H, H-6b<sup>b</sup>, H-6a<sup>d</sup>), 3.76 (s, 3 H, OMe), 3.74–3.68 (m,



7 H, H-3<sup>a</sup>, H-6b<sup>d</sup>, 2 OCH<sub>2</sub>, OMe), 3.65–3.30 (m, 18 H, H-6a<sup>a</sup>, H-6b<sup>a</sup>, H-5<sup>b</sup>, H-5<sup>c</sup>, H-6b<sup>c</sup>, H-2<sup>e</sup>, H-3<sup>e</sup>, H-1b<sup>Cer</sup>, 8 OCH<sub>2</sub>, 2 NHCH<sub>2</sub>), 3.25 (near dt, 1 H, H-5<sup>a</sup>), 2.93 (m, 1 H, H-2<sup>d</sup>), 2.11 (s, 3 H, Ac), 2.11 (s, 3 H, Ac), 2.08 (s, 3 H, Ac), 2.08 (s, 3 H, Ac), 2.05 (s, 3 H, Ac), 2.04 (s, 3 H, Ac), 1.95–1.89 (m, 11 H, H-6a<sup>Cer</sup>, H-6b<sup>Cer</sup>, 3 Ac), 1.83 (s, 3 H, Ac), 1.70–1.66 (m, 2 H, NHC(=O)CH<sub>2</sub>), 1.35–1.05 (m, 76 H, H-6<sup>f</sup>, 26 CH<sub>2</sub><sup>Cer</sup>, 2 <sup>t</sup>Bu, Ac), 0.89–0.86 (m, 6 H, 2 Me<sup>Cer</sup>); <sup>13</sup>C NMR (125 MHz, CDCl<sub>3</sub>) δ 172.6, 171.7, 171.3, 170.6, 170.5, 170.5, 170.4, 170.4, 169.9, 169.8, 169.6, 169.5, 166.1, 165.9, 165.2, 165.1, 165.0, 159.3, 159.1, 157.5, 157.2, 157.0, 156.4, 137.1, 133.6, 133.6, 133.4, 130.5, 130.1, 129.8, 129.7, 129.6, 129.5, 129.5, 129.1, 128.9, 128.8, 128.7, 128.5, 128.5, 127.6, 126.8, 125.4, 125.3, 124.9, 117.1, 114.8, 113.9, 113.7, 101.7, 101.1, 100.6, 99.2, 98.4, 95.1, 81.6, 79.1, 77.6, 75.4, 74.8, 74.1, 73.5, 73.4, 73.4, 73.2, 72.9, 72.2, 71.4, 71.1, 71.1, 70.7, 70.6, 70.4, 70.3, 70.2, 70.1, 70.1, 69.3, 68.7, 68.5, 67.8, 67.5, 67.4, 66.0, 64.3, 62.0, 61.6, 61.3, 61.1, 55.9, 55.2, 55.2, 50.3, 39.8, 36.4, 35.1, 35.0, 32.3, 31.9, 31.1, 29.7, 29.7, 29.6, 29.6, 29.5, 29.5, 29.4, 29.3, 29.3, 29.0, 25.6, 22.7, 22.5, 20.8, 20.8, 20.7, 20.6, 20.6, 20.5, 20.5, 15.7, 14.1; HRMS (ESI) *m/z*: found [M/2+Na]<sup>+</sup> 1564.2121, C<sub>161</sub>H<sub>218</sub>F<sub>3</sub>N<sub>3</sub>O<sub>52</sub> calcd for [M/2+Na]<sup>+</sup> 1564.2121.

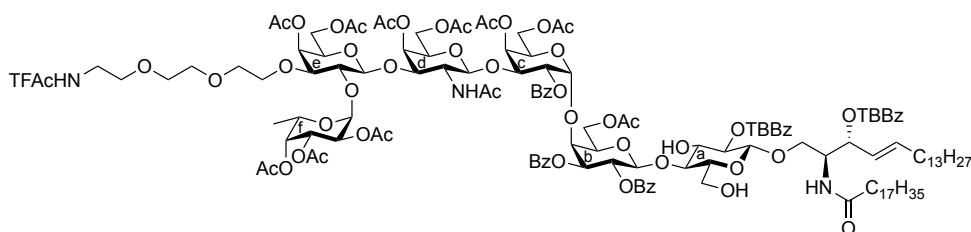

## Compound 49

To a solution of compound **48** (154 mg, 49.9 μmol) in CH<sub>2</sub>Cl<sub>2</sub> (3.3 mL) was added TFA (1.70 mL, 22.2 mmol) at 0 °C. After stirring for 30 min at 0 °C as the progress of the reaction was monitored by TLC (toluene/acetone = 3/1, developed twice), the reaction mixture was neutralized with satd. aq. NaHCO<sub>3</sub> and diluted with CHCl<sub>3</sub>. The organic layer was washed with satd. aq. NaHCO<sub>3</sub> and brine, dried over Na<sub>2</sub>SO<sub>4</sub>, and concentrated. The residue was purified by silica gel column chromatography (toluene/acetone = 4/1) to give compound **49** (138 mg, 97%) as a white amorphous solid; [α]<sub>D</sub> +38.2° (c 1.0, CHCl<sub>3</sub>); <sup>1</sup>H NMR (500 MHz, CDCl<sub>3</sub>) δ 8.06–7.16 (m, 24 H, 5 Ar, CF<sub>3</sub>C(=O)NH), 6.51 (d, 1 H, *J*<sub>2,NH</sub> = 6.5 Hz, NH-2<sup>d</sup>), 5.89 (near quin, 1 H, *J*<sub>5,6a</sub> = *J*<sub>5,6b</sub> = 6.5 Hz, *J*<sub>4,5</sub> = 15.4 Hz, H-5<sup>Cer</sup>), 5.78–5.75 (m, 2 H, H-2<sup>b</sup>, NH-2<sup>Cer</sup>), 5.62 (d, 1 H, *J*<sub>1,2</sub> = 3.0 Hz, H-1<sup>f</sup>), 5.58 (t, 1 H, *J*<sub>2,3</sub> = *J*<sub>3,4</sub> = 8.5 Hz, H-3<sup>Cer</sup>), 5.54–5.52 (m, 2 H, H-2<sup>c</sup>, H-4<sup>c</sup>), 5.43 (dd, 1 H, H-4<sup>Cer</sup>), 5.39 (d, 1 H, *J*<sub>3,4</sub> = 3.0 Hz, H-4<sup>d</sup>), 5.32 (d, 1 H, *J*<sub>3,4</sub> = 3.0 Hz, H-4<sup>e</sup>), 5.28 (dd, 1 H, *J*<sub>3,4</sub> = 2.8 Hz, *J*<sub>2,3</sub> = 10.8 Hz, H-3<sup>b</sup>), 5.20–5.16 (m, 3 H, H-1<sup>d</sup>, H-3<sup>f</sup>, H-4<sup>f</sup>), 5.14–5.10 (m, 3 H, H-2<sup>a</sup>, H-1<sup>c</sup>, H-2<sup>f</sup>), 5.01 (dd, 1 H, *J*<sub>2,3</sub> = 11.0 Hz, H-3<sup>d</sup>), 4.87 (d, 1 H, *J*<sub>1,2</sub> = 8.0 Hz, H-1<sup>b</sup>), 4.51–4.37 (m, 6 H, H-1<sup>a</sup>, H-3<sup>c</sup>, H-5<sup>d</sup>, H-1<sup>e</sup>, H-5<sup>f</sup>, H-2<sup>Cer</sup>), 4.29–4.24 (m, 3 H, H-4<sup>b</sup>, H-6a<sup>c</sup>, H-6a<sup>e</sup>), 4.14–4.07 (m, 4 H, H-6a<sup>b</sup>,

H-6b<sup>c</sup>, H-5<sup>e</sup>, OH-3<sup>a</sup>), 4.03–3.97 (m, 3 H, H-5<sup>b</sup>, H-5<sup>c</sup>, H-6b<sup>e</sup>), 3.93–3.86 (m, 3 H, H-3<sup>a</sup>, H-4<sup>a</sup>, H-1a<sup>Cer</sup>), 3.76–3.68 (m, 3 H, H-6b<sup>b</sup>, H-6a<sup>d</sup>, OCH<sub>2</sub>), 3.62–3.26 (m, 16 H, H-6a<sup>a</sup>, H-6b<sup>d</sup>, H-2<sup>e</sup>, H-3<sup>e</sup>, H-1b<sup>Cer</sup>, 9 OCH<sub>2</sub>, 2 NHCH<sub>2</sub>), 3.15 (br d, 1 H, H-5<sup>a</sup>), 3.02–2.96 (m, 2 H, H-6b<sup>a</sup>, H-2<sup>d</sup>), 2.85 (br d, 1 H, OH-6<sup>a</sup>), 2.14 (s, 3 H, Ac), 2.12–2.11 (m, 9 H, 3 Ac), 2.08 (s, 3 H, Ac), 2.07 (s, 3 H, Ac), 2.00–1.97 (m, 4 H, H-6a<sup>Cer</sup>, H-6b<sup>Cer</sup>, NHC(=O)CH<sub>2</sub>), 1.94 (s, 3 H, Ac), 1.92 (s, 3 H, Ac), 1.87 (s, 3 H, Ac), 1.86 (s, 3 H, Ac), 1.50–1.22 (m, 73 H, 26 CH<sub>2</sub><sup>Cer</sup>, 2 <sup>t</sup>Bu, Ac), 1.08 (d, 3 H, *J*<sub>5,6</sub> = 6.5 Hz, H-6<sup>f</sup>), 0.89–0.85 (m, 6 H, 2 Me<sup>Cer</sup>); <sup>13</sup>C NMR (125 MHz, CDCl<sub>3</sub>) δ 172.7, 172.1, 171.2, 170.6, 170.4, 170.2, 170.1, 169.8, 169.6, 169.5, 166.0, 165.9, 165.7, 165.6, 165.2, 157.8, 157.5, 157.2, 157.0, 157.0, 138.5, 137.9, 133.7, 133.4, 130.0, 129.8, 129.8, 129.6, 129.4, 129.0, 128.9, 128.8, 128.8, 128.7, 128.6, 128.5, 128.4, 128.2, 127.3, 127.2, 125.5, 125.4, 125.3, 124.9, 119.4, 117.1, 114.8, 102.2, 101.8, 99.6, 99.2, 98.1, 95.1, 81.5, 81.0, 74.3, 74.0, 73.9, 73.5, 73.3, 73.0, 72.8, 72.5, 71.9, 71.5, 71.2, 70.8, 70.6, 70.4, 70.3, 70.3, 70.2, 70.1, 69.5, 69.3, 69.2, 68.7, 68.5, 67.8, 67.5, 66.1, 64.3, 62.3, 61.9, 61.5, 61.4, 59.6, 56.0, 53.8, 50.4, 39.8, 36.8, 35.2, 35.1, 32.3, 31.9, 31.1, 31.1, 29.7, 29.7, 29.6, 29.6, 29.5, 29.4, 29.4, 29.3, 29.3, 28.9, 25.6, 22.7, 22.6, 20.8, 20.8, 20.7, 20.7, 20.7, 20.6, 20.6, 20.3, 15.7, 14.1; HRMS (ESI) *m/z*: found [M/2+Na]<sup>+</sup> 1444.1546, C<sub>145</sub>H<sub>202</sub>F<sub>3</sub>N<sub>3</sub>O<sub>50</sub> calcd for [M/2+Na]<sup>+</sup> 1444.1546.

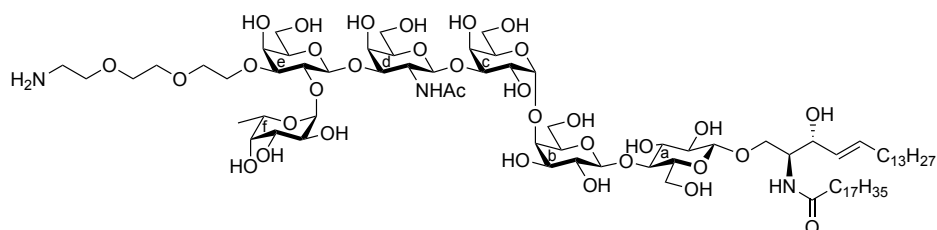

## Compound 50

To a solution of compound **49** (129 mg, 45.4 μmol) in MeOH/THF = 1/1 (15 mL) was added 1 M NaOH aq. (908 μL, 0.908 mmol). After stirring for 18 h at ambient temperature as the progress of the reaction was monitored by TLC (CHCl<sub>3</sub>/MeOH/H<sub>2</sub>O/AcOH = 5/4/1/0.2), the reaction mixture was neutralized with Muromac (H<sup>+</sup>), the resin was filtered through cotton, and washed with CHCl<sub>3</sub>/MeOH = 1/1. The combined filtrate and washings were concentrated and co-evaporated with EtOH. The residue was purified by silica gel column chromatography (CHCl<sub>3</sub>/MeOH/H<sub>2</sub>O/28% NH<sub>3</sub> aq. = 5/1/0.05/0 → 5/4/1/0 → 3/3/1/0.1) to give compound **50** (75.3 mg, 98%) as a white amorphous solid; [α]<sub>D</sub> +13.2° (c 1.0, CHCl<sub>3</sub>/MeOH = 1/1); <sup>1</sup>H NMR (500 MHz, CDCl<sub>3</sub>/CD<sub>3</sub>OD = 1/1) δ 5.70 (near quin, 1 H, *J*<sub>5,6a</sub> = *J*<sub>5,6b</sub> = 6.8 Hz, *J*<sub>4,5</sub> = 15.2 Hz, H-5<sup>Cer</sup>), 5.46 (dd, 1 H, *J*<sub>3,4</sub> = 7.8 Hz, H-4<sup>Cer</sup>), 5.30 (d, 1 H, *J*<sub>1,2</sub> = 3.5 Hz, H-1<sup>f</sup>), 4.98 (d, 1 H, *J*<sub>1,2</sub> = 4.0 Hz, H-1<sup>c</sup>), 4.61–4.30 (4 d, 4 H, H-1<sup>a</sup>, H-1<sup>b</sup>, H-1<sup>d</sup>, H-1<sup>e</sup>), 4.24–3.31 (m, 48 H, H-2<sup>a</sup>, H-3<sup>a</sup>, H-4<sup>a</sup>, H-5<sup>a</sup>, H-6a<sup>a</sup>, H-6b<sup>a</sup>, H-2<sup>b</sup>, H-3<sup>b</sup>, H-4<sup>b</sup>, H-5<sup>b</sup>, H-6a<sup>b</sup>, H-6b<sup>b</sup>, H-2<sup>c</sup>, H-3<sup>c</sup>, H-4<sup>c</sup>, H-5<sup>c</sup>,

H-6a<sup>c</sup>, H-6b<sup>c</sup>, H-2<sup>d</sup>, H-3<sup>d</sup>, H-4<sup>d</sup>, H-5<sup>d</sup>, H-6a<sup>d</sup>, H-6b<sup>d</sup>, H-2<sup>e</sup>, H-3<sup>e</sup>, H-4<sup>e</sup>, H-5<sup>e</sup>, H-6a<sup>e</sup>, H-6b<sup>e</sup>, H-2<sup>f</sup>, H-3<sup>f</sup>, H-4<sup>f</sup>, H-5<sup>f</sup>, H-1a<sup>Cer</sup>, H-1b<sup>Cer</sup>, H-2<sup>Cer</sup>, H-3<sup>Cer</sup>, 5 OCH<sub>2</sub>), 3.18 (m, 2 H, NHCH<sub>2</sub>), 2.19–2.16 (m, 2 H, NHC(=O)CH<sub>2</sub>), 2.05–2.01 (m, 5 H, H-6a<sup>Cer</sup>, H-6b<sup>Cer</sup>, Ac), 1.60–1.58 (m, 2 H, NHC(=O)CH<sub>2</sub>CH<sub>2</sub>), 1.37–1.24 (m, 53 H, H-6<sup>f</sup>, 25 CH<sub>2</sub><sup>Cer</sup>), 0.91–0.88 (m, 6 H, 2 Me<sup>Cer</sup>); <sup>13</sup>C NMR (125 MHz, CDCl<sub>3</sub>/CD<sub>3</sub>OD = 1/1) δ 175.3, 174.1, 134.9, 130.2, 104.7, 104.5, 103.6, 103.1, 102.3, 99.9, 83.3, 80.4, 80.3, 78.8, 75.6, 75.5, 75.4, 75.3, 75.1, 74.1, 72.7, 72.5, 72.3, 71.8, 71.1, 70.8, 70.5, 69.7, 69.5, 69.3, 69.0, 68.6, 67.7, 67.2, 66.0, 62.3, 62.0, 61.2, 61.1, 58.0, 53.9, 52.5, 50.1, 40.2, 37.0, 32.9, 32.5, 32.1, 30.9, 30.2, 30.2, 30.2, 30.2, 30.1, 30.1, 30.1, 30.0, 29.9, 29.9, 29.9, 29.8, 26.6, 26.2, 23.4, 23.2, 18.1, 16.3, 14.3; HRMS (ESI) *m/z*: found [M+H]<sup>+</sup> 1694.9937, C<sub>80</sub>H<sub>147</sub>N<sub>3</sub>O<sub>34</sub> calcd for [M+H]<sup>+</sup> 1694.9939.

**<sup>1</sup>H NMR (400 MHz, DMSO-*d*<sub>6</sub>)**

| Chemical Shift (ppm) | Integration |
|----------------------|-------------|
| 8.03                 | 0.43        |
| 7.73                 | 1.83        |
| 7.53                 | 0.92        |
| 7.23                 | 0.92        |
| 6.93                 | 1.83        |
| 6.63                 | 1.83        |
| 6.33                 | 1.83        |
| 6.03                 | 1.83        |
| 5.73                 | 1.02        |
| 5.43                 | 0.93        |
| 5.13                 | 1.01        |
| 4.83                 | 1.28        |
| 4.53                 | 0.53        |
| 4.23                 | 2.08        |
| 3.93                 | 1.11        |
| 3.63                 | 2.06        |
| 3.33                 | 0.10        |
| 3.03                 | 43.83       |
| 2.73                 | 125.65      |
| 2.43                 | 1.84        |
| 2.13                 | 0.93        |
| 1.83                 | 2.22        |
| 1.53                 | 2.44        |
| 1.23                 | 2.78        |
| 0.93                 | 3.08        |
| 0.63                 | 12.93       |
| 0.33                 | 30.77       |
| 0.03                 | 49.83       |
| -0.23                | 1.65        |
| -0.53                | 6.03        |

**<sup>13</sup>C NMR (100 MHz, DMSO-*d*<sub>6</sub>)**

| Chemical Shift (ppm) |
|----------------------|
| 175.97               |
| 175.97               |
| 159.22               |
| 159.22               |
| 154.16               |
| 154.16               |
| 135.14               |
| 135.14               |
| 131.41               |
| 131.41               |
| 125.18               |
| 125.18               |
| 115.00               |
| 115.00               |
| 106.34               |
| 106.34               |
| 105.55               |
| 105.55               |
| 104.43               |
| 104.43               |
| 104.30               |
| 104.30               |
| 97.03                |
| 97.03                |
| 81.32                |
| 81.32                |
| 81.21                |
| 81.21                |
| 80.75                |
| 80.75                |
| 79.46                |
| 79.46                |
| 76.25                |
| 76.25                |
| 76.43                |
| 76.43                |
| 76.37                |
| 76.37                |
| 76.25                |
| 76.25                |
| 74.70                |
| 74.70                |
| 73.03                |
| 73.03                |
| 72.58                |
| 72.58                |
| 72.45                |
| 72.45                |
| 71.72                |
| 71.72                |
| 71.49                |
| 71.49                |
| 71.11                |
| 71.11                |
| 70.65                |
| 70.65                |
| 70.53                |
| 70.53                |
| 69.97                |
| 69.97                |
| 69.74                |
| 69.74                |
| 69.51                |
| 69.51                |
| 69.48                |
| 69.48                |
| 66.77                |
| 66.77                |
| 62.66                |
| 62.66                |
| 61.75                |
| 61.75                |
| 61.53                |
| 61.53                |
| 61.27                |
| 61.27                |
| 61.54                |
| 61.54                |
| 58.35                |
| 58.35                |
| 54.69                |
| 54.69                |
| 53.87                |
| 53.87                |
| 53.55                |
| 53.55                |
| 53.44                |
| 53.44                |
| 41.35                |
| 41.35                |
| 40.41                |
| 40.41                |
| 38.78                |
| 38.78                |
| 37.41                |
| 37.41                |
| 33.53                |
| 33.53                |
| 33.15                |
| 33.15                |
| 33.14                |
| 33.14                |
| 32.80                |
| 32.80                |
| 30.94                |
| 30.94                |
| 30.88                |
| 30.88                |
| 30.87                |
| 30.87                |
| 30.83                |
| 30.83                |
| 30.77                |
| 30.77                |
| 30.71                |
| 30.71                |
| 30.55                |
| 30.55                |
| 30.52                |
| 30.52                |
| 30.47                |
| 30.47                |
| 29.48                |
| 29.48                |
| 29.44                |
| 29.44                |
| 27.23                |
| 27.23                |
| 24.24                |
| 24.24                |
| 23.80                |
| 23.80                |
| 23.75                |
| 23.75                |
| 23.46                |
| 23.46                |
| 23.00                |
| 23.00                |
| 18.41                |
| 18.41                |
| 14.52                |
| 14.52                |
| 14.48                |
| 14.48                |
| 13.76                |
| 13.76                |
| 13.74                |
| 13.74                |
| 0.00                 |
| 0.00                 |

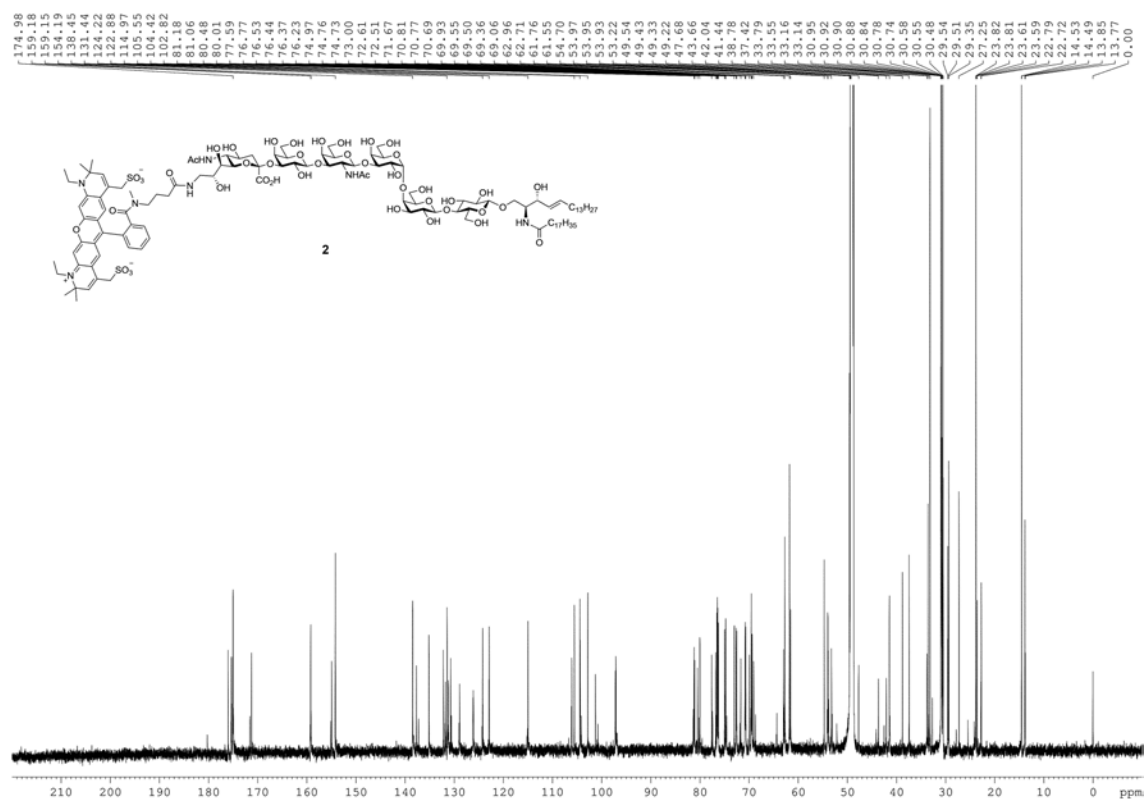

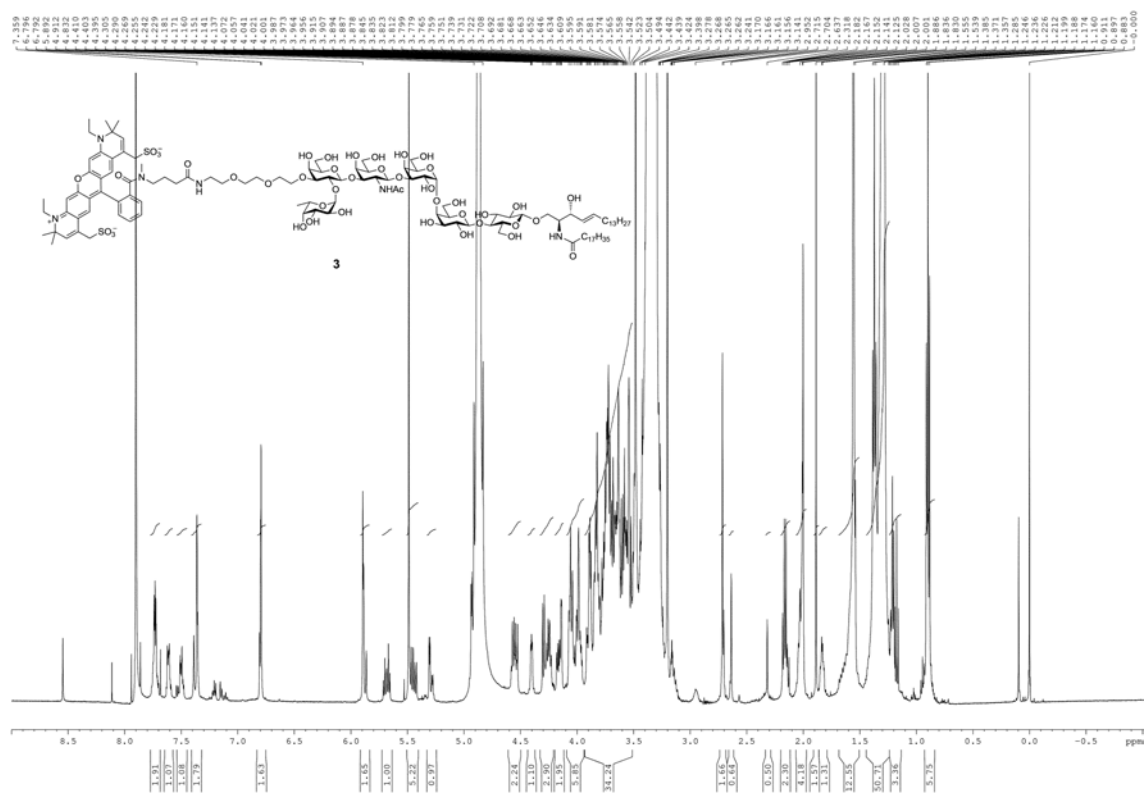









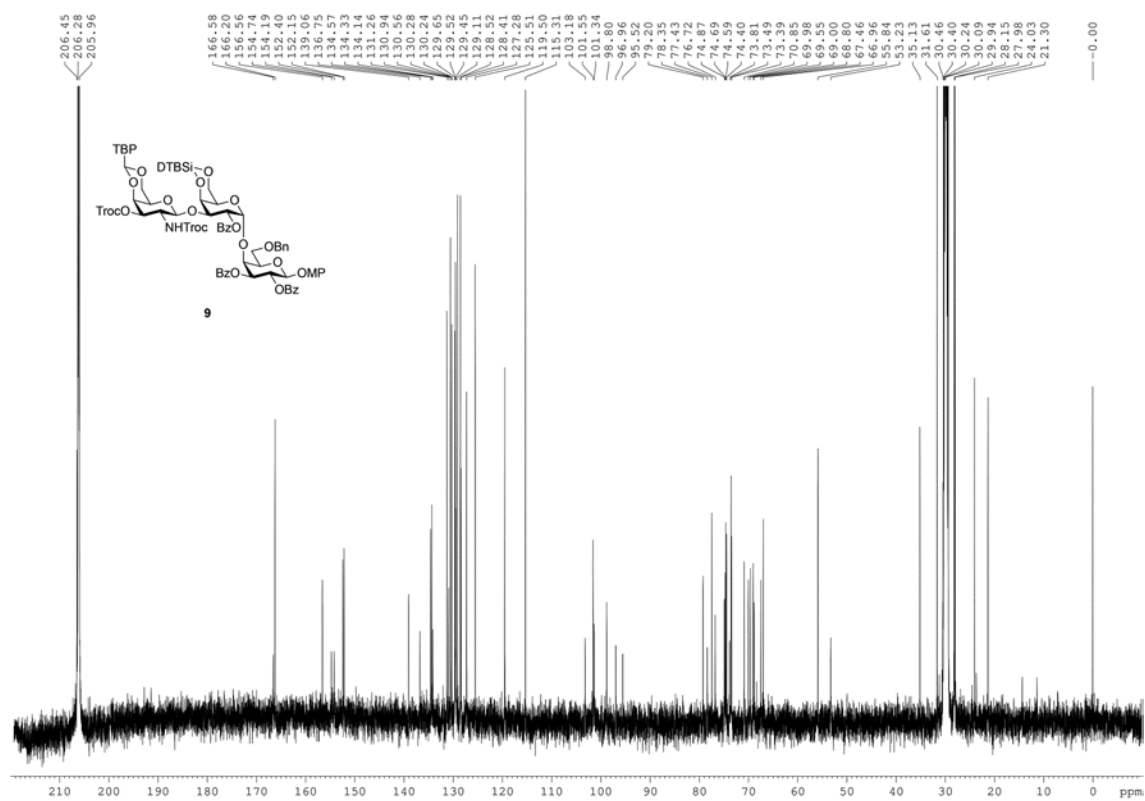

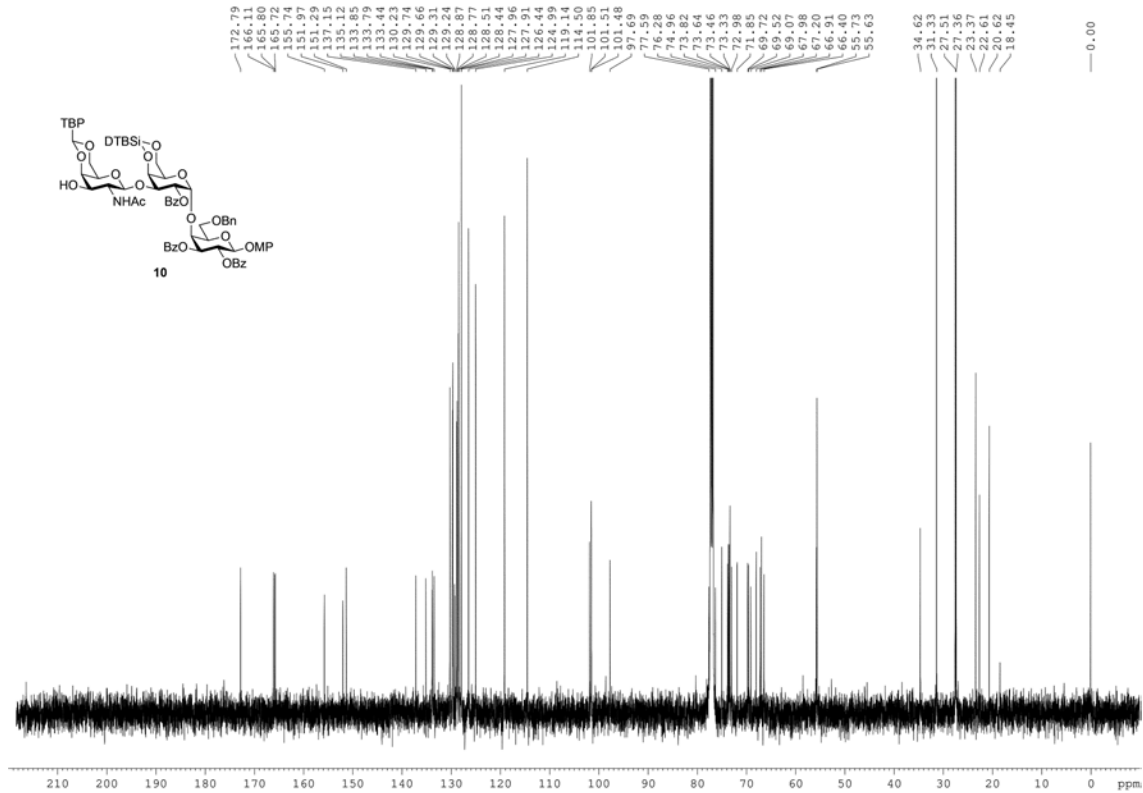



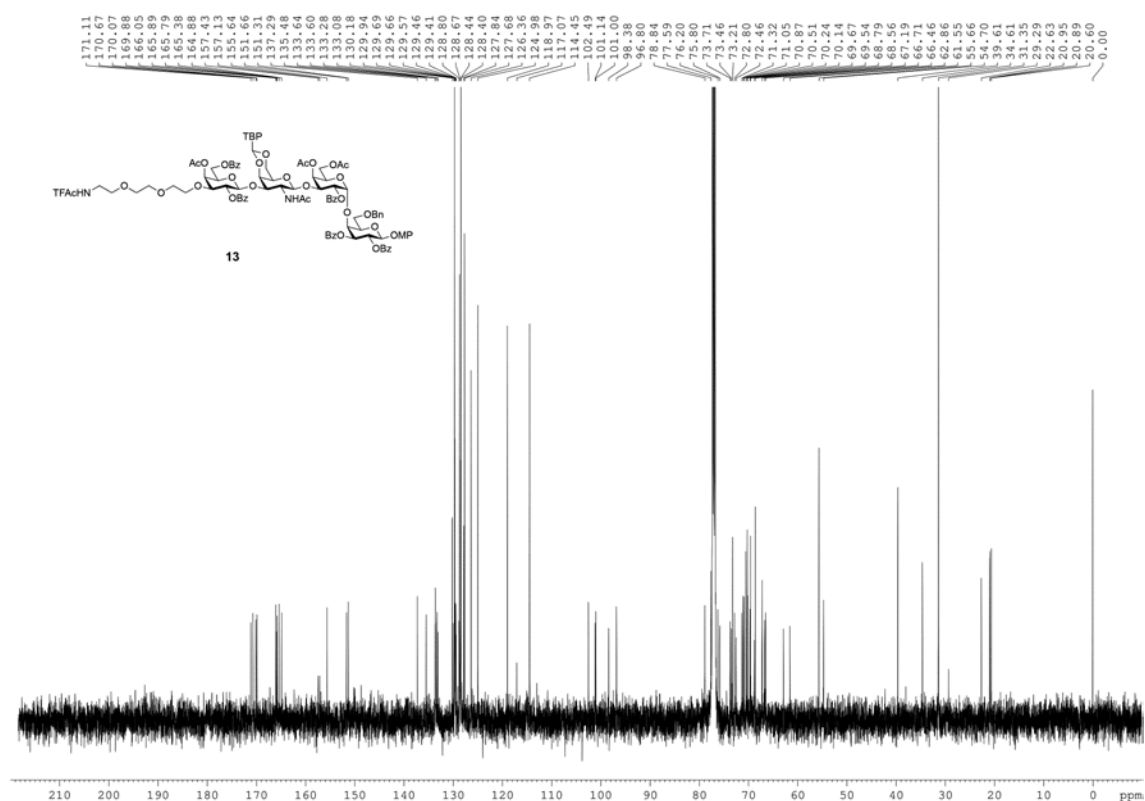



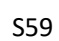

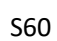



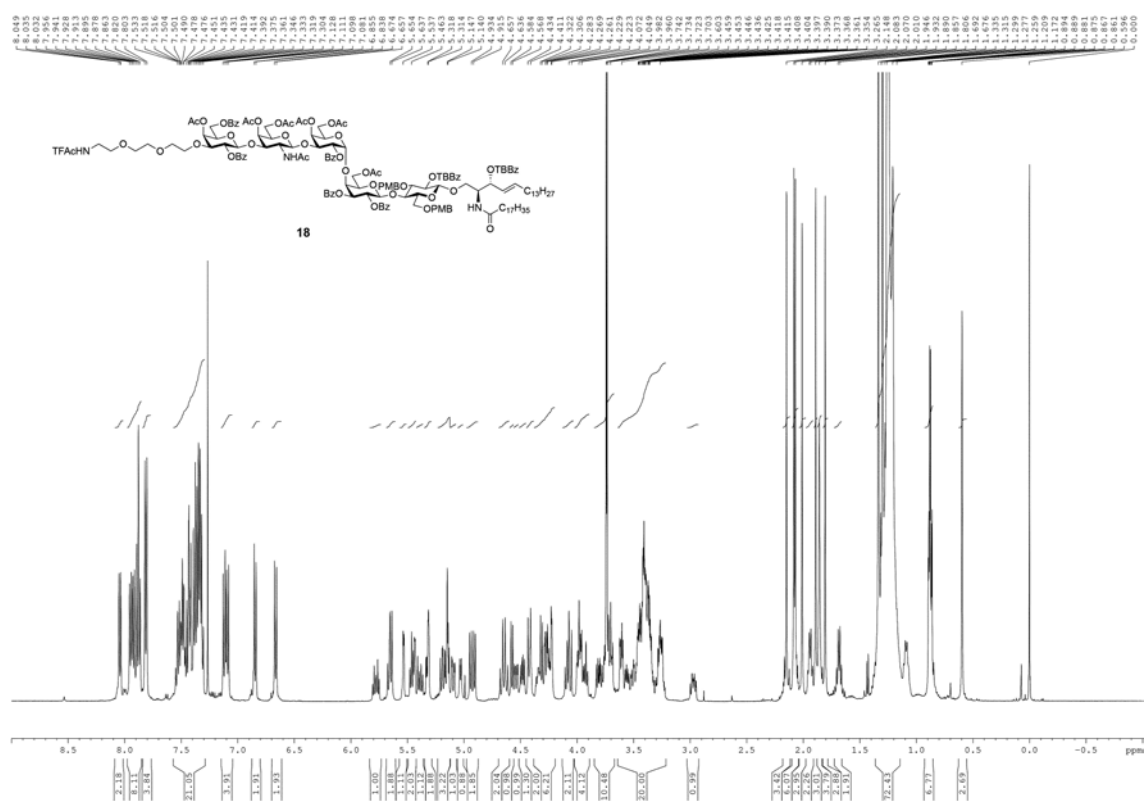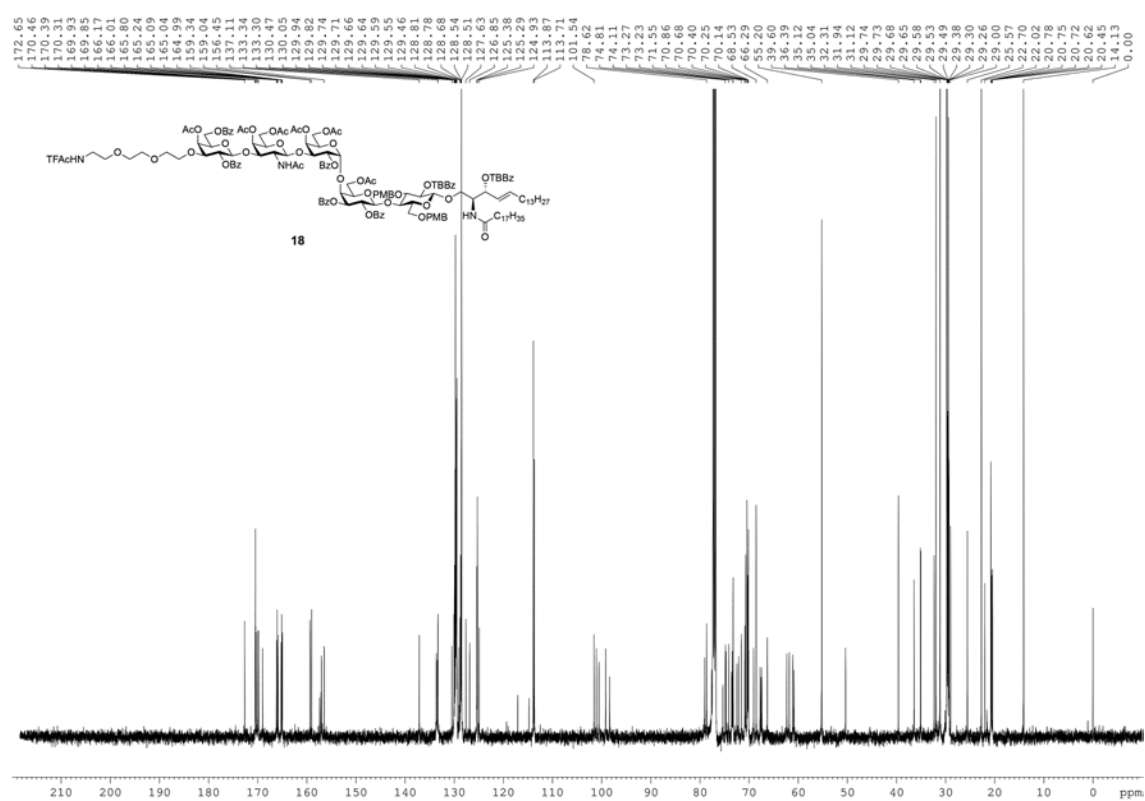







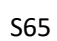



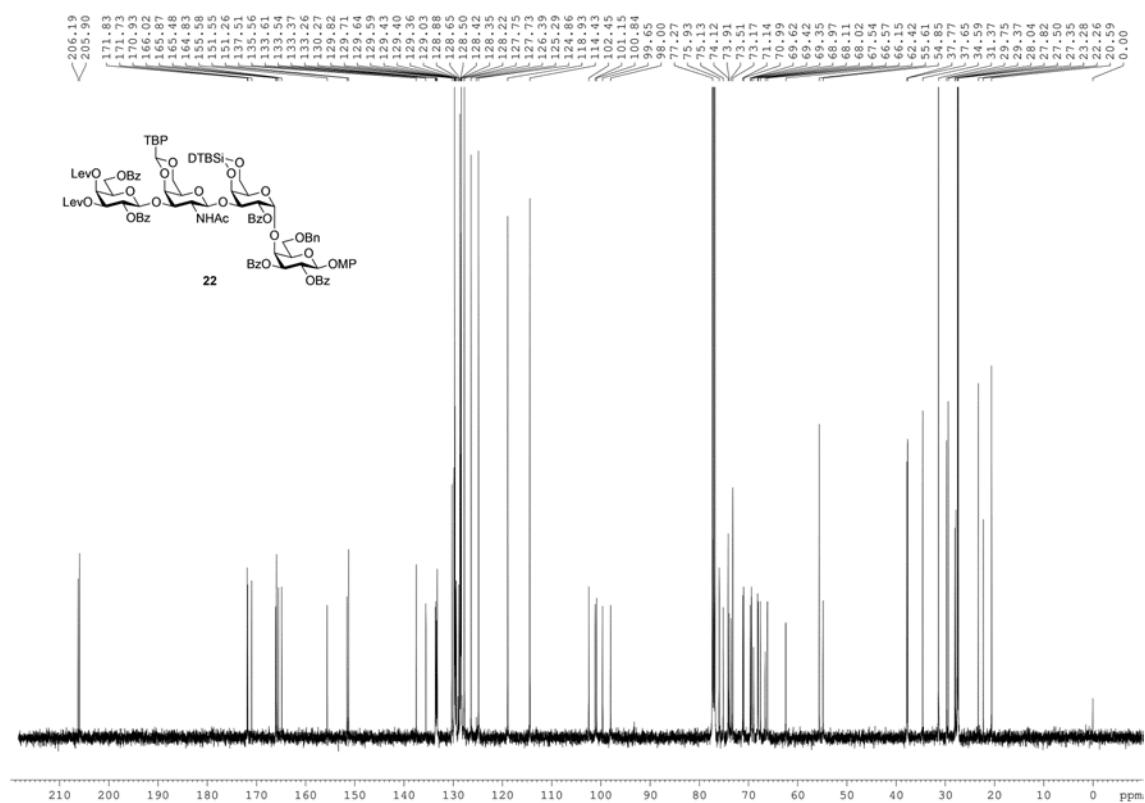

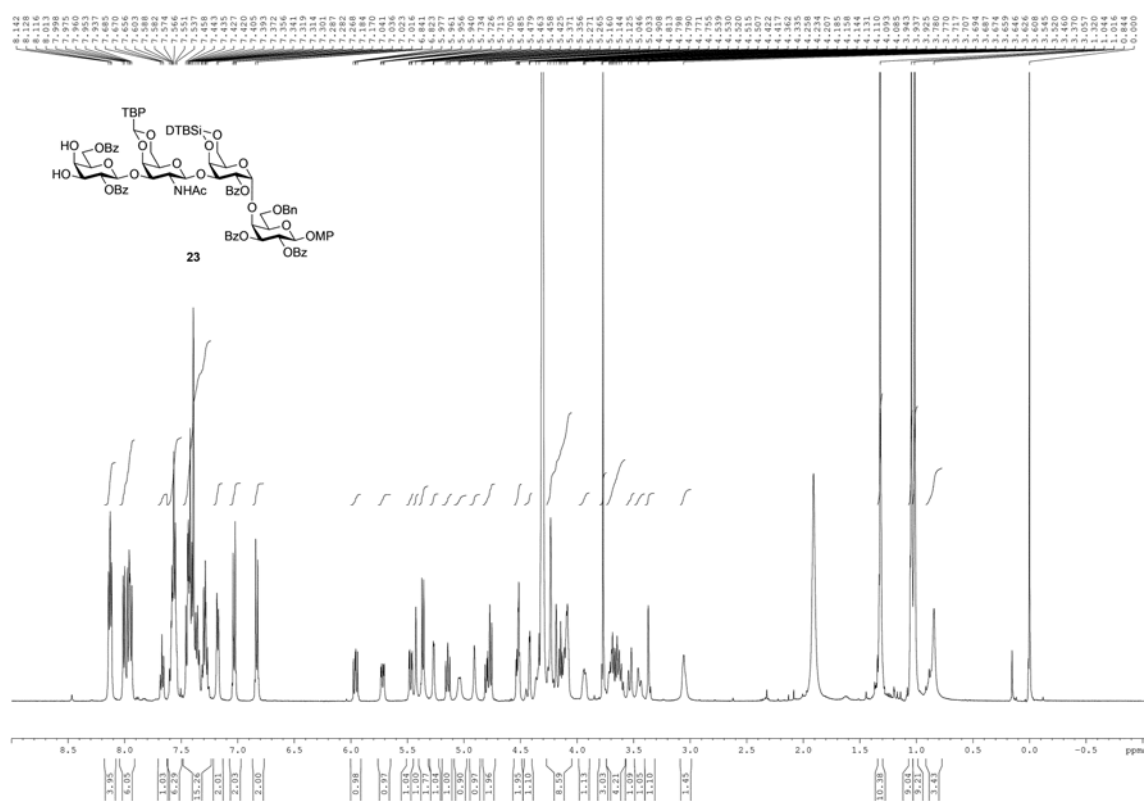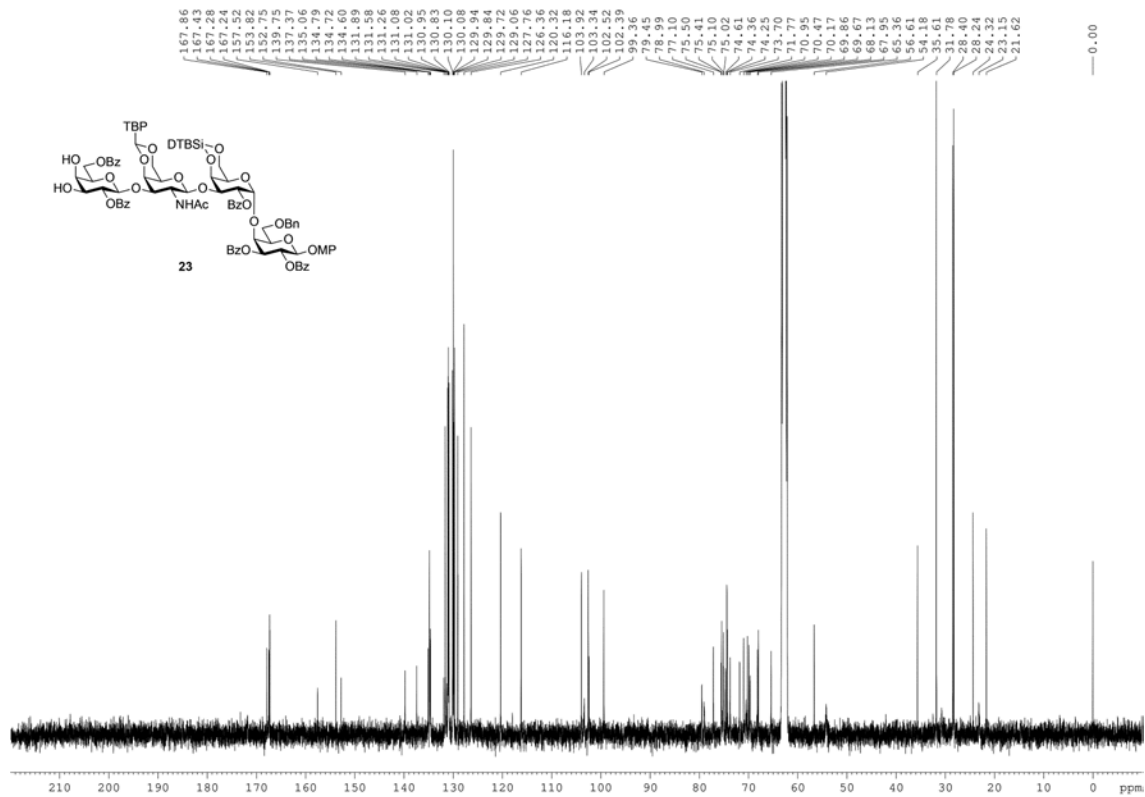





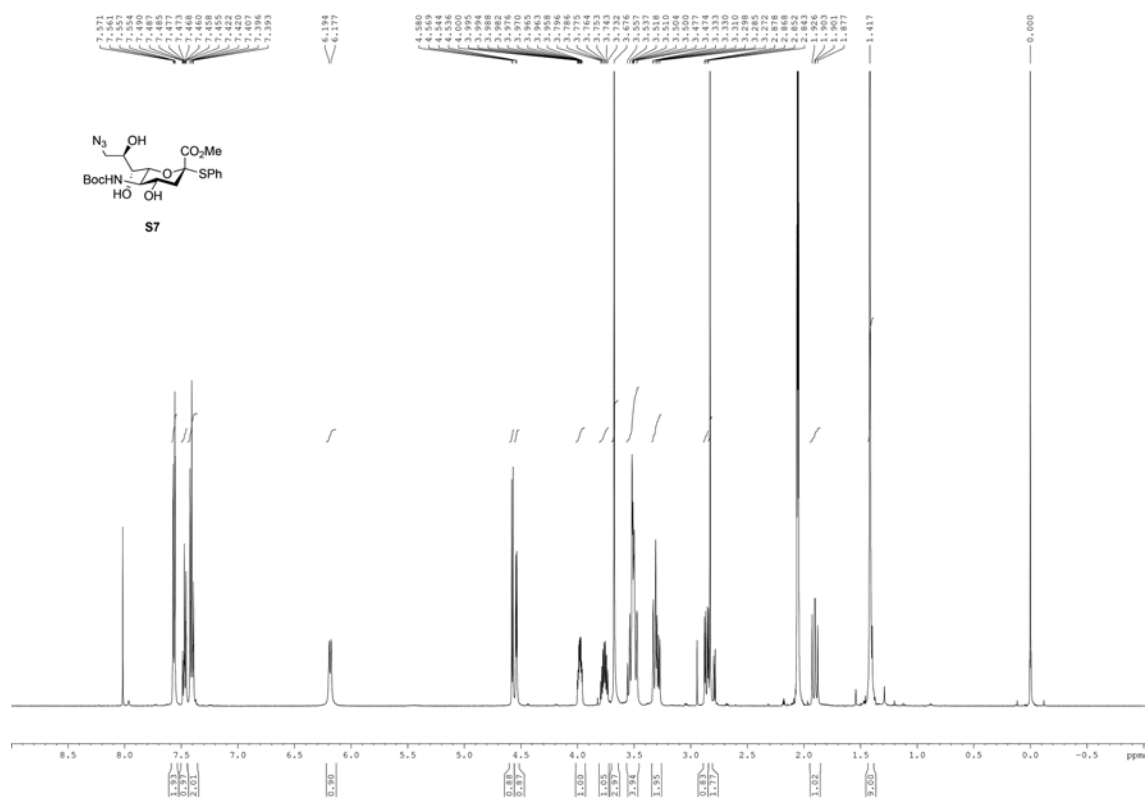

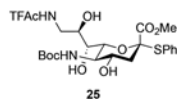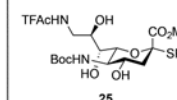







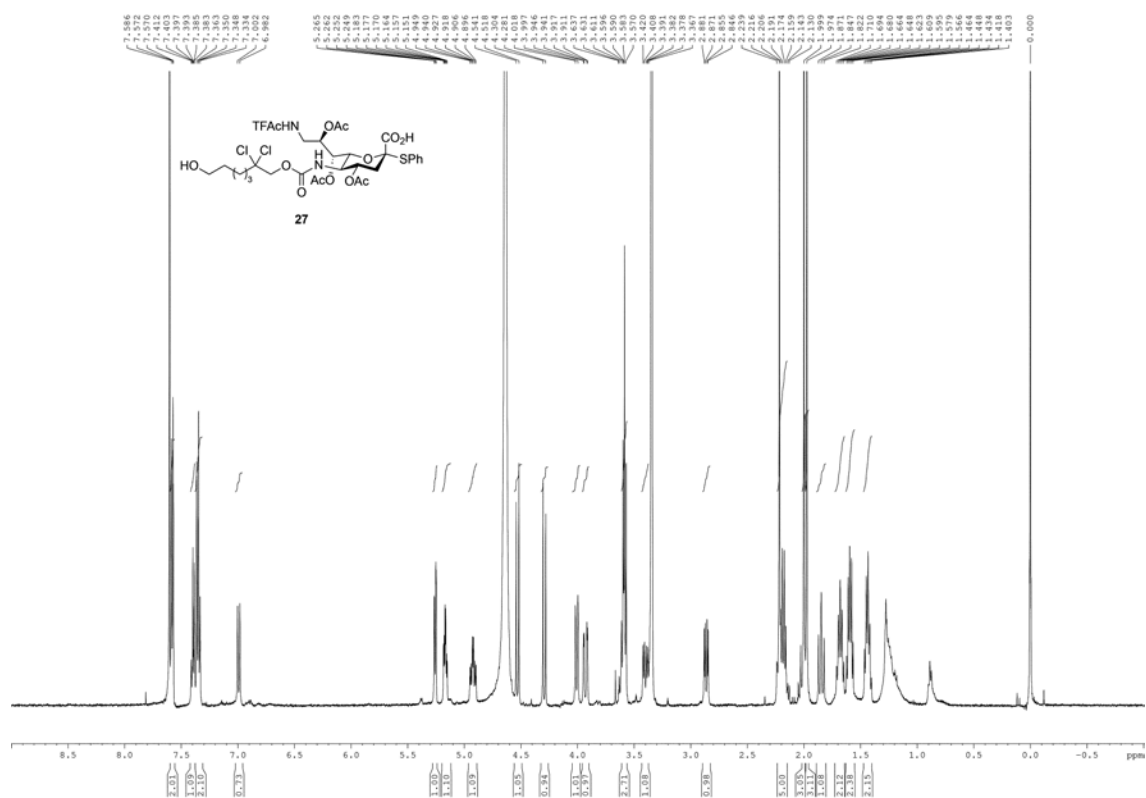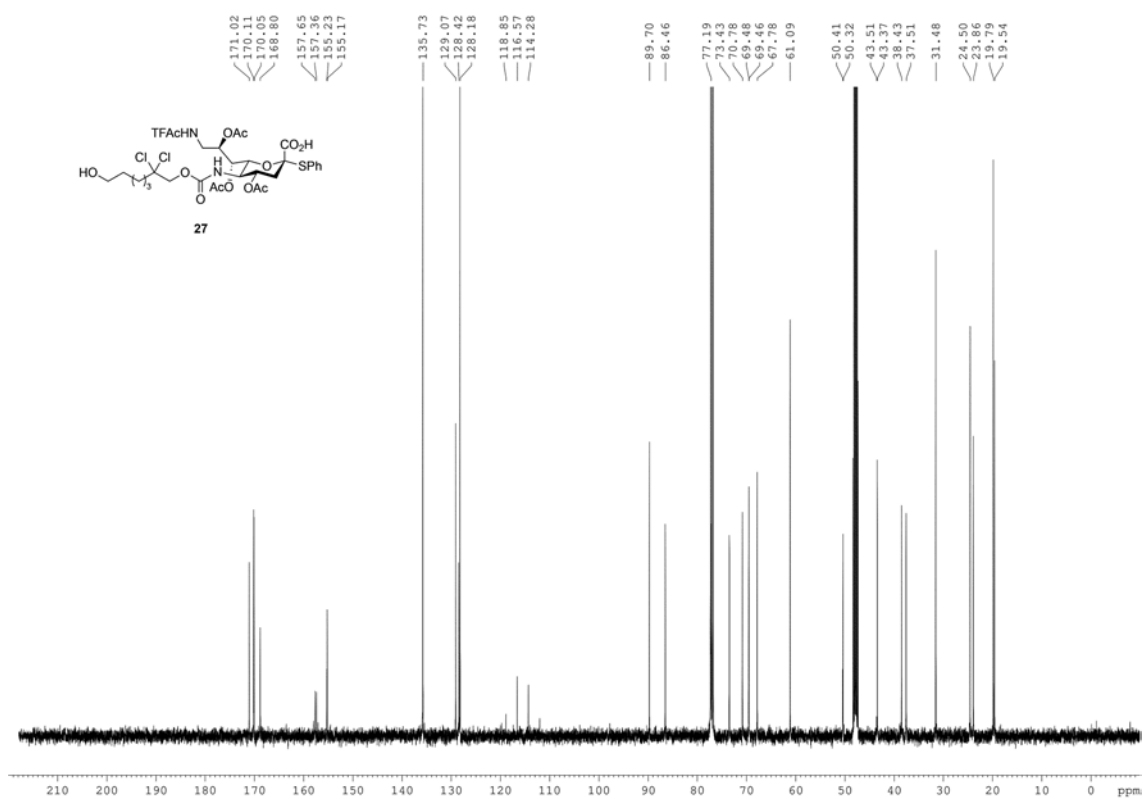

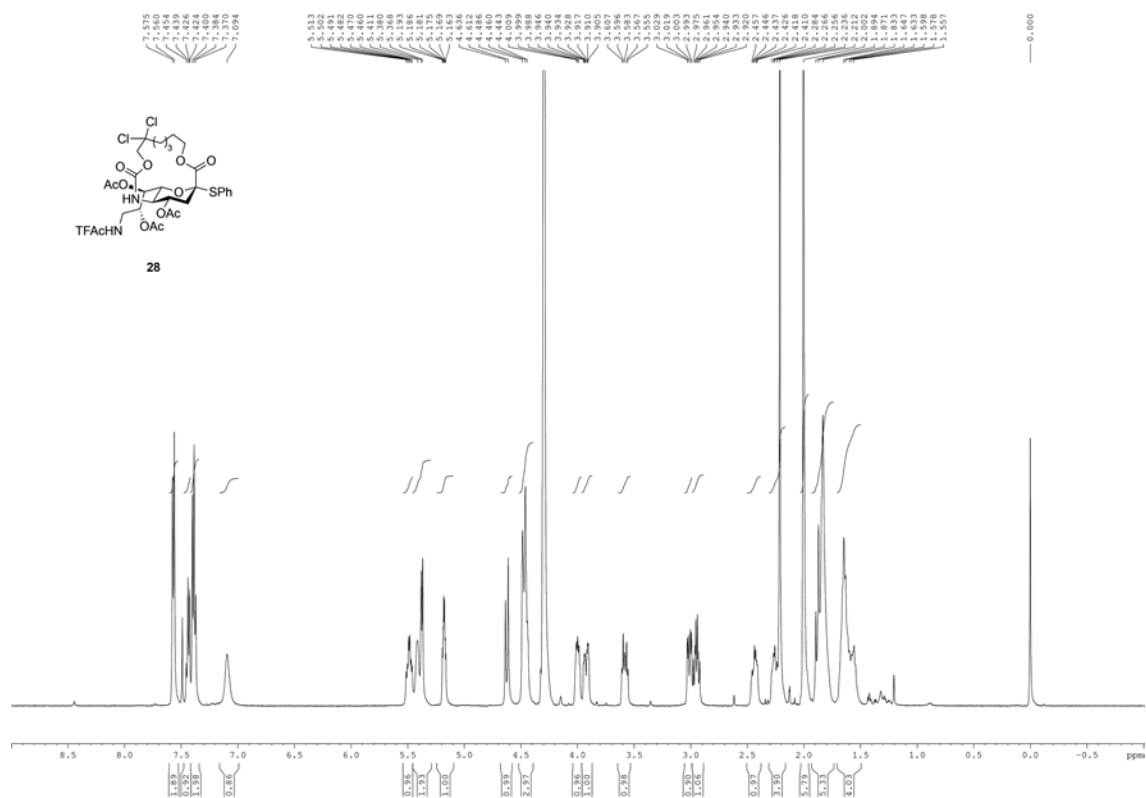





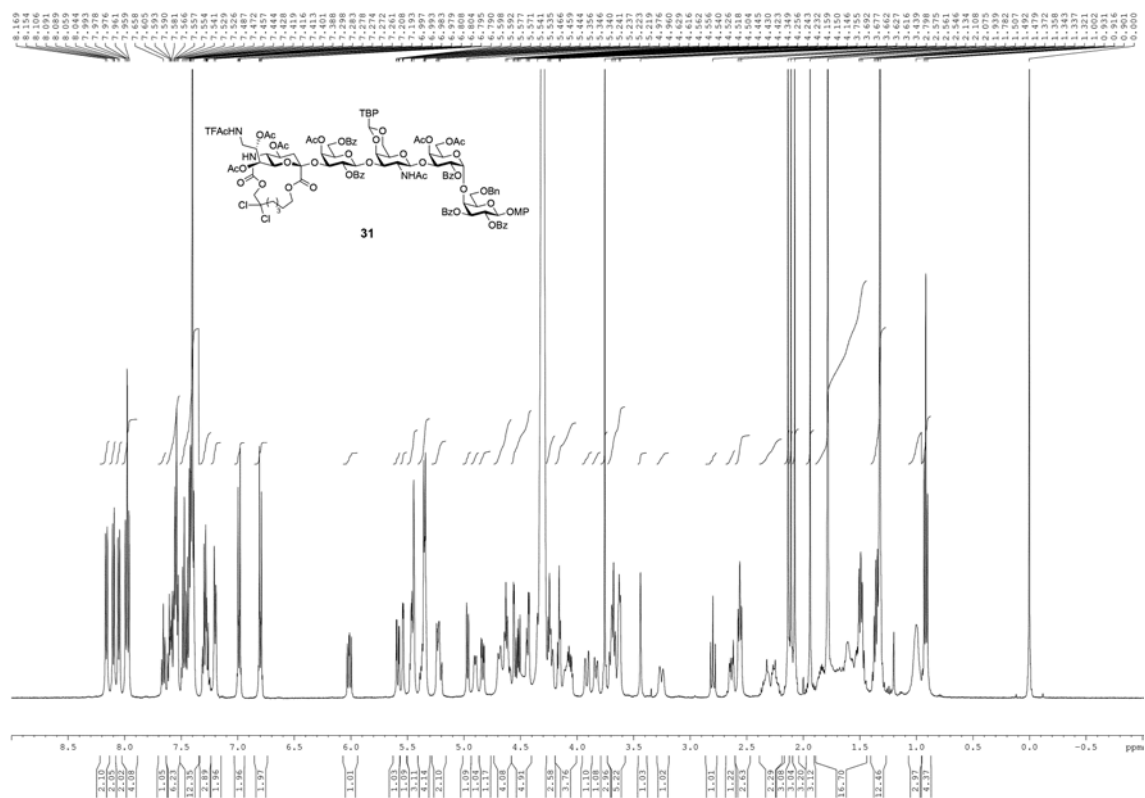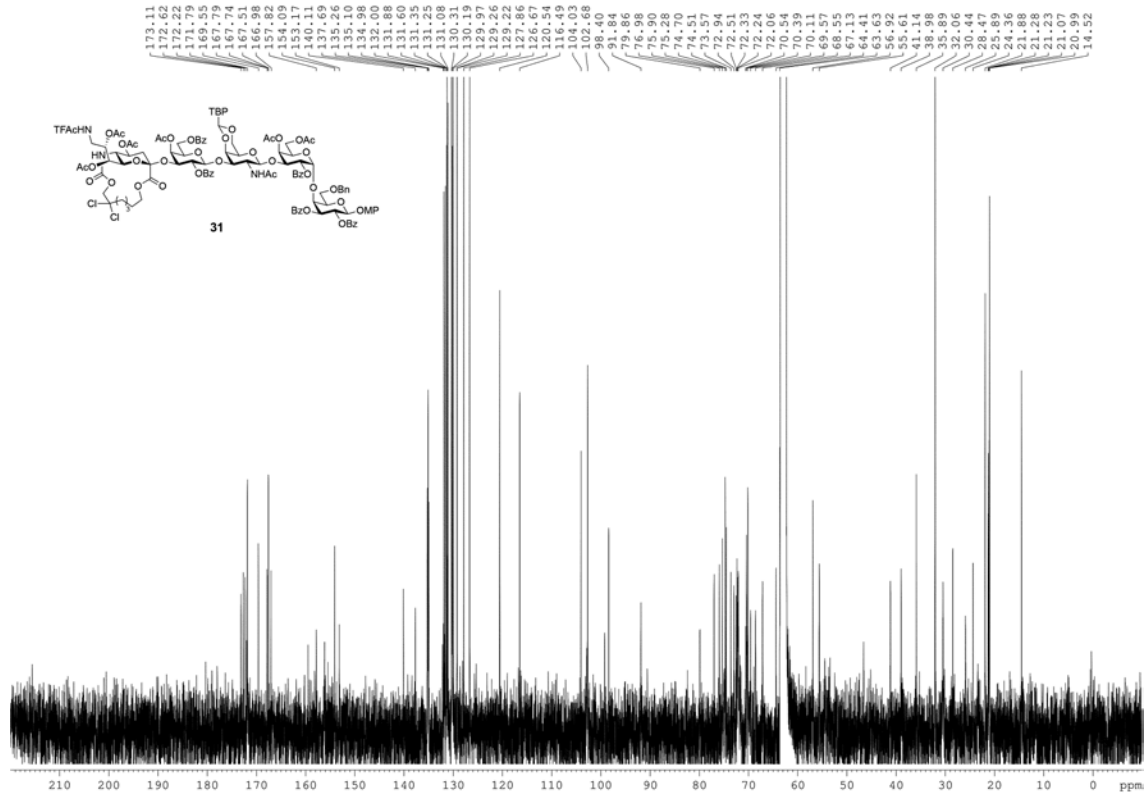





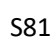

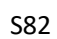

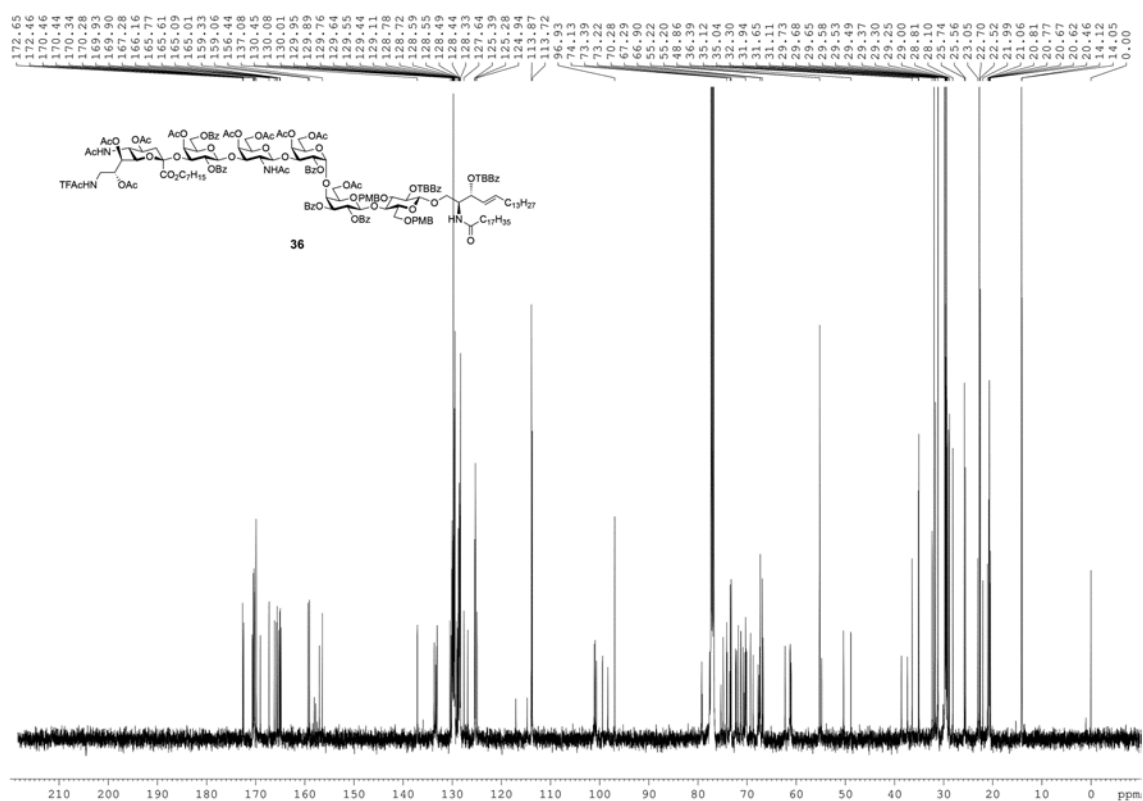





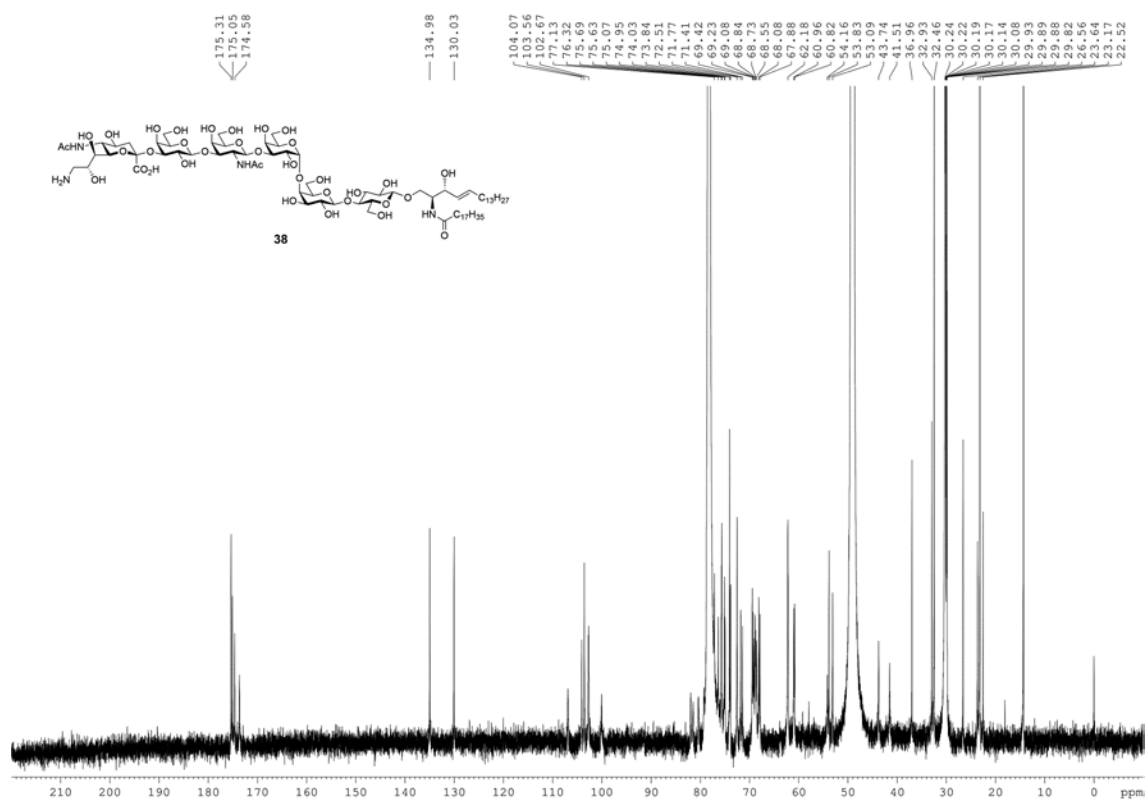



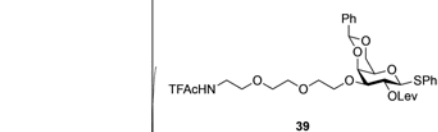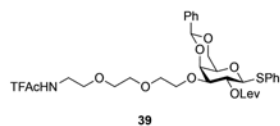





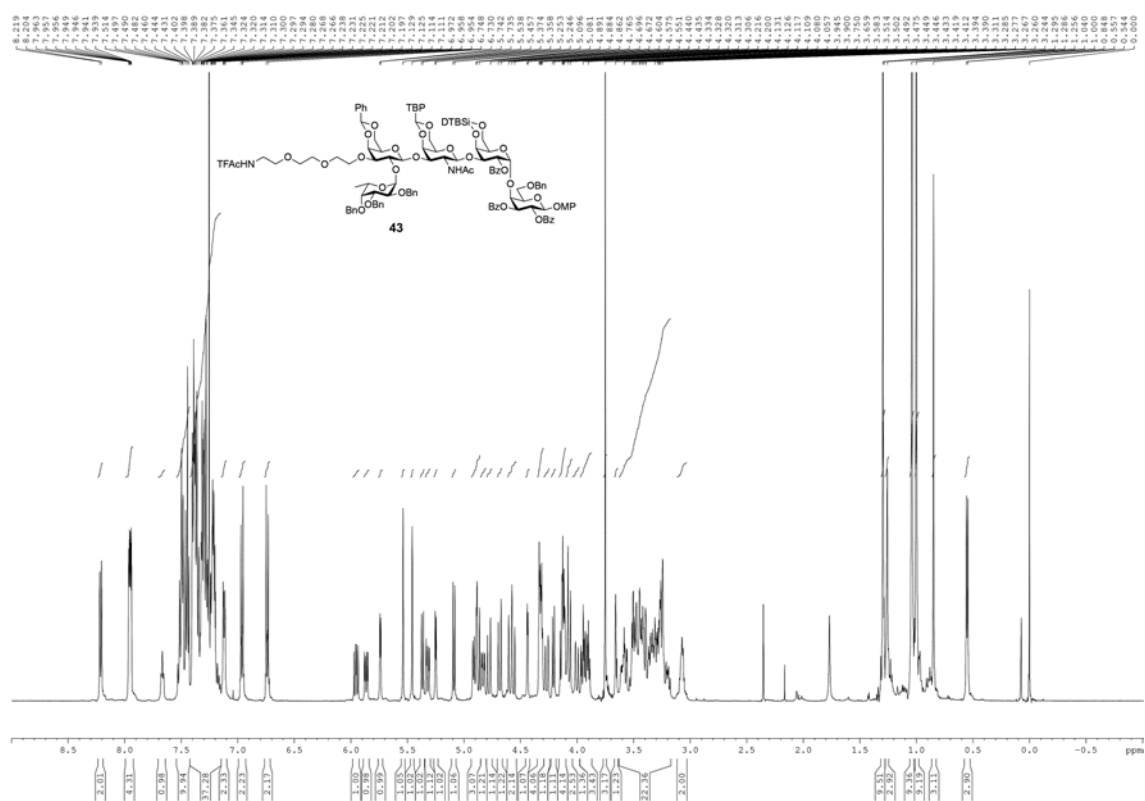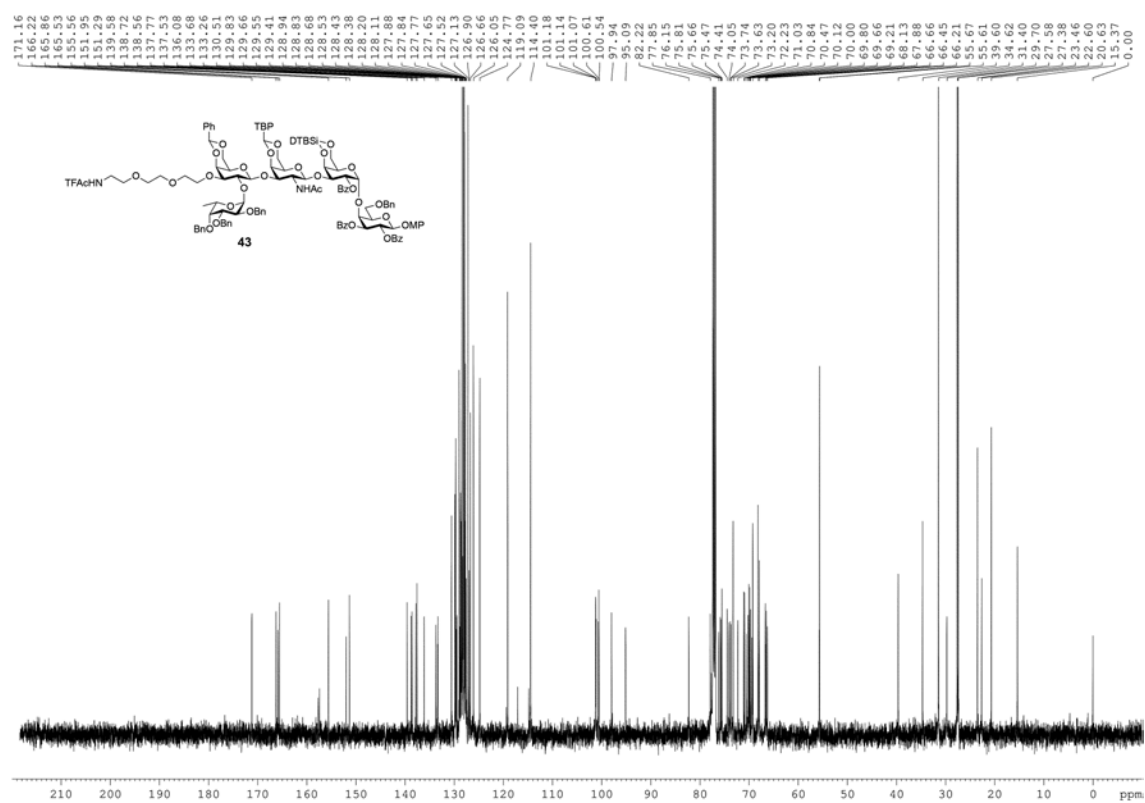

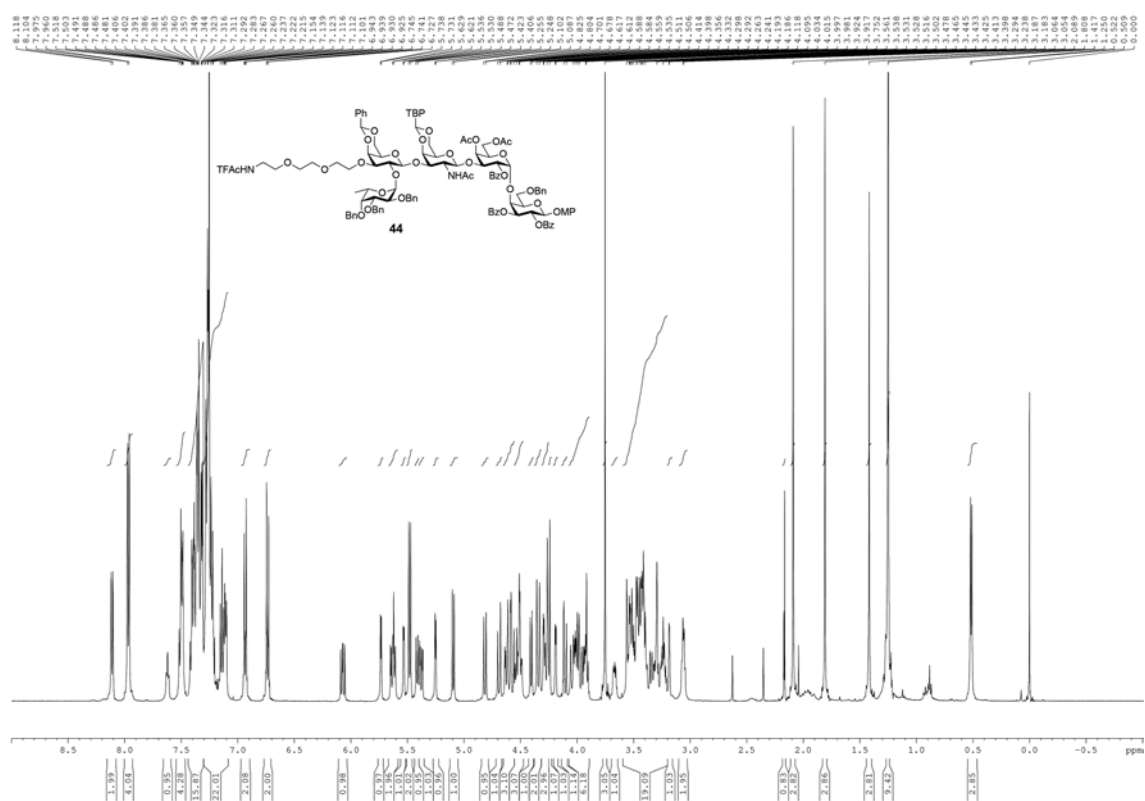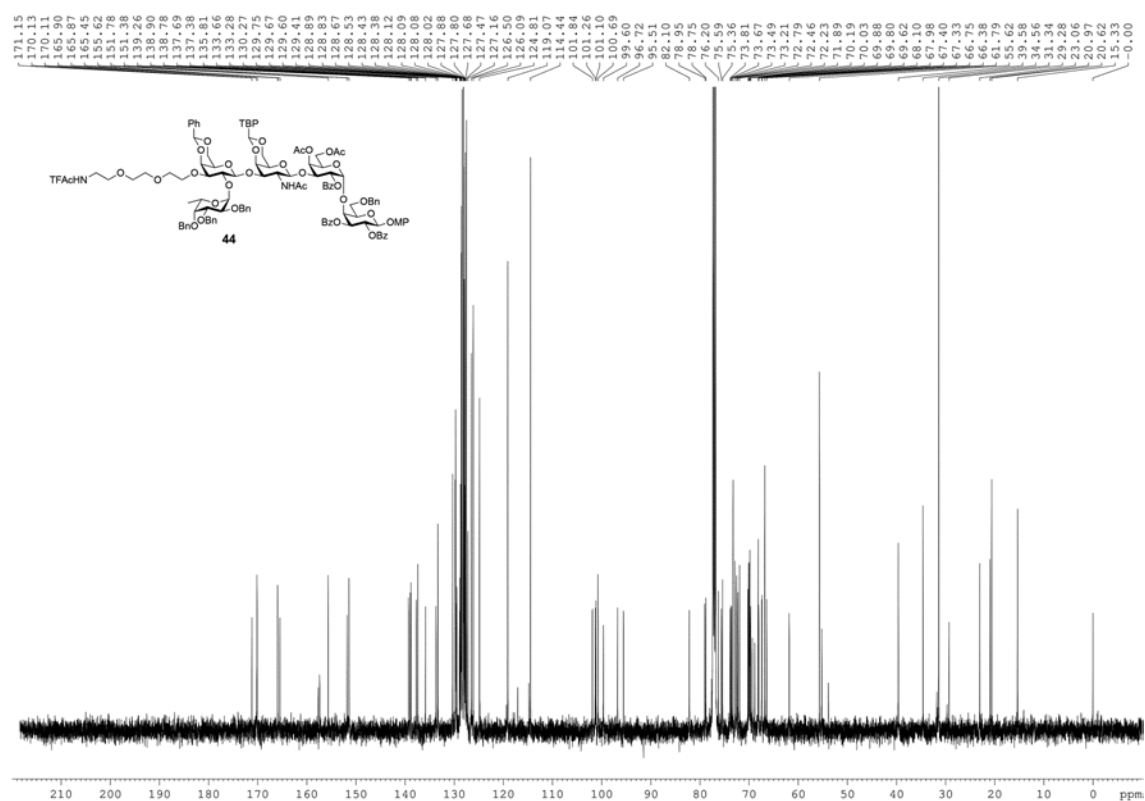





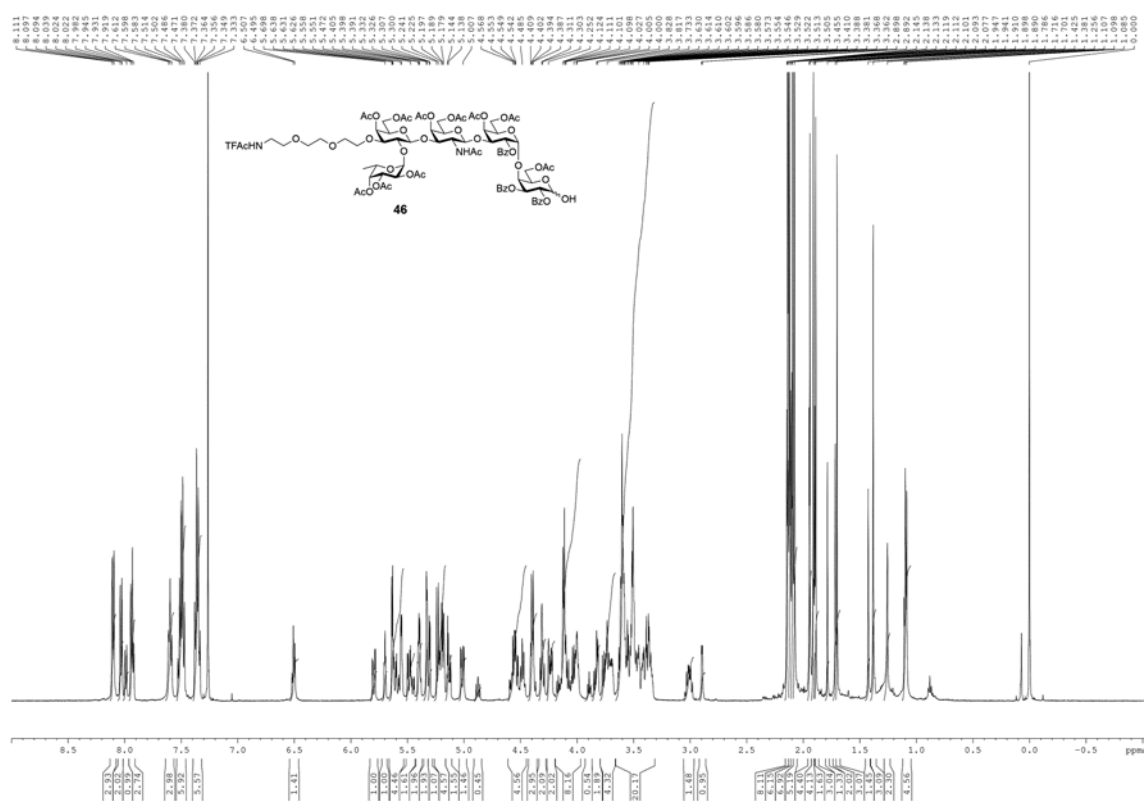

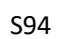





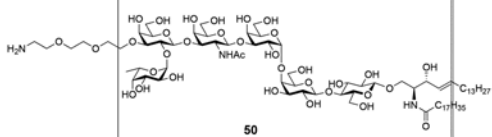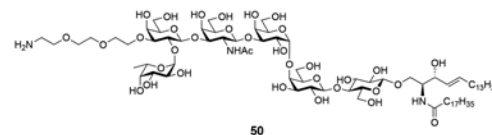

### 3. References

- (S01) Gold, H.; Boot, R. G.; Aerts, J. M. F. G.; Overkleeft, H. S.; Codée, J. D. C.; van der Marel, G. A. A concise synthesis of globotriaosylsphingosine. *Eur. J. Org. Chem.* **2011**, 1652–1663.
- (S02) Panchadhayee, R.; Misra, A. K. Regioselective reductive ring opening of benzylidene acetals using triethylsilane and iodine. *Synlett* **2010**, 1430–1430.
- (S03) Asano, S.; Tanaka, H.-N.; Imamura, A.; Ishida, H.; Ando, H. *p*-*tert*-Butyl groups improve the utility of aromatic protective groups in carbohydrate synthesis. *Org. Lett.* **2019**, *21*, 4197–4200.
- (S04) Gu, G.; Du, Y.; Pan, J. Concise synthesis of a buffalo milk pentasaccharide derivative. *Carbohydr. Res.* **2002**, *337*, 1313–1317.
- (S05) Tanaka, H.; Ando, H.; Ishihara, H.; Koketsu, M. Sialylation reactions with 5-*N*,7-*O*-carbonyl-protected sialyl donors: unusual stereoselectivity with nitrile solvent assistance. *Carbohydr. Res.* **2008**, *343*, 1585–1593.
- (S06) Hossain, M. I.; Hanashima, S.; Nomura, T.; Lethu, S.; Tsuchikawa, H.; Murata, M.; Kusaka, H.; Kita, S.; Maenaka, K. Synthesis and Th1-immunostimulatory activity of  $\alpha$ -galactosylceramide analogues bearing a halogen-containing or selenium-containing acyl chain. *Bioorg. Med. Chem.* **2016**, *24*, 3687–3695.
- (S07) Lu, G.; Burgess, K. A diversity oriented synthesis of 3'-*O*-modified nucleoside triphosphates for DNA 'sequencing by synthesis'. *Bioorg. Med. Chem. Lett.* **2006**, *16*, 3902–3905.
- (S08) Mandal, S. S.; Liao, G.; Guo, Z. Chemical synthesis of the tumor-associated Globo-H antigen. *RSC Adv.* **2015**, *5*, 23311–23319.
